# Supplementary material for: Key of Suppressed Triplet Nonradiative Transition-Dependent Chemical Backbone for Spatial Self-Tunable Afterglow
Source: PubMed Central journal article supplement — JACS Au. 2021 May 26;1(7):945–54. doi: 10.1021/jacsau.1c00132 (PMC8395709; doi:10.1021/jacsau.1c00132), 2021-05-26
Supplement: au1c00132_si_001.pdf [file au1c00132_si_001.pdf]

# Supporting Information

## Key of Suppressed Triplet Nonradiative Transition-Dependent Chemical Backbone for Spatial Self-Tunable Afterglow

*Indranil Bhattacharjee, Kikuya Hayashi and Shuzo Hirata\**

Department of Engineering Science, The University of Electro-Communications, 1-5-1, Chofugaoka, Chofu, Tokyo 182-8585, Japan

\*Corresponding author. E-mail: shuzohirata@uec.ac.jp

This file includes

### **S1. Synthesis of chromophores and characterization**

### **S2. Measurement procedure of $\Phi_{isc}(RT)$**

### **S3. Theoretical analyses of optically measured $\Phi_{isc}(RT)$**

### **S4. Measurement procedure of $\Phi_p(RT)$**

### **S5. Effect of RTP antenna to enhance $k_p$**

### **S6. Supporting display items**

<sup>1</sup>H NMR, <sup>13</sup>C NMR, and HRMS spectra of all the synthesized chromophore (Figure S1–S6)

Absorbance spectra of the samples used for the demonstration of Figure 1c (Figure S7)

Fluorescence decay of the chromophores (Figure S8)

Supporting data to determine  $\Phi_{isc}(RT)$  (Figure S9–S11 and Table S1)

Molecular orbitals relating S<sub>1</sub>–S<sub>0</sub> transition (Figure S12)

Theoretical analysis regarding  $\Phi_{isc}(RT)$  (Figure S13–S16)

Separation of  $\Phi_p(RT)$  from steady state emission under excitation (Figure S17)

Excitation spectra regarding *p*RTP signal (Figure S18)

Temperature dependent afterglow emission and decay spectra (Figure S19 and S20)

Fitting of the  $k_{nr}(T)+k_q(T)$  of all the chromophores (Figure S21)

Role of RTP antenna in **2** and **3** (Figure S22)

Statistic good correlation regarding  $k_{nr}(RT)$  and  $\sum_p |\partial \langle T_1 | \hat{H}_{S_0} | S_0 \rangle / \partial Q_p|^2 P(RT)FC$  (Figure S23)

Data to determine optical  $k_{nr}(RT)$  for molecularly dispersed naphthalene (Figure S24)

Information to determine  $|\partial \langle T_1 | \hat{H}_{S_0} | S_0 \rangle / \partial Q_p|^2 P(RT)$  (Table S2–S7)

Estimation of *FC* (Figure S25)

Steady state emission image of sample 3D depending on excitation intensity (Figure S26)

Absorbance spectra of the samples used for the demonstration of Figure 6f (Figure S27)

Supporting Movies (Movie S1–S3)

### **S7. Supporting Reference**

## **S1. Synthesis of chromophores and characterization**

Chromophore **1** is available commercially and **4** was prepared according to a previous report.<sup>12</sup> Syntheses of **2** and **3** were performed by using the following conventional organic chemistry reactions. The synthesized **2** and **3** were characterized by proton nuclear magnetic resonance (<sup>1</sup>H NMR), carbon nuclear magnetic resonance (<sup>13</sup>C NMR) (ECA-500, JEOL, Japan) spectroscopy, electrospray ionization high-resolution mass spectroscopy (HRMS-ESI) (JMS-T100 AccuTOF, Jeol) (Figure S1–S6) and elemental analysis (Series II CHNS/O 2400 analyzer, PerkinElmer, USA). Chromophores **2D** and **3D** were synthesized after deuteration of 1-aminocoronene (Figure S4) followed by C–N coupling. **2D** and **3D**. Detailed information regarding the synthesis, purification and characterizations is as follows.

### **1-Aminocoronene:**

Coronene (500 mg, 1.67 mmol, 1 equiv.) was placed in a 50-mL round-bottom flask that was charged with acetic anhydride (10 mL) and allowed to stir at 0 °C for 15 min. Fuming nitric acid (126 µL, 2.00 mmol, 1.2 equiv.) was added dropwise to the solution at 0 °C. After 3 h of the reaction, conc. sulfuric acid (196 µL, 2.00 mmol, 1.2 equiv.) was added to the reaction mixture with extreme care. The reaction temperature was maintained at 0 °C during the addition, and allowed to stir at room temperature (RT) for overnight. After completion of the reaction, water was added to the reaction mixture, which formed a yellow precipitate that was filtered out. The precipitate was washed with water, isopropanol and diethyl ether. The next reaction was performed by using the 1-nitrocoronene yellow ppt. without further purification.

1-Nitrocoronene (300 mg, 0.87 mmol, 1 equiv.), tin (II) chloride dihydrate (784 mg,

3.47 mmol, 4 equiv.) and concentrated hydrochloric acid (3 mL) were placed in a 250-mL round-bottom flask and ethanol (10 mL) was added as a solvent. The reaction mixture was stirred at 80 °C for 6 h. After completion of the reaction, the pH of the reaction mixture was kept at 7 by sodium-hydroxide solution addition. Ethyl acetate (25 mL × 3) was added to the reaction mixture and a final wash was undertaken with brine solution. The organic layer was dried with anhydrous sodium sulfate (Na<sub>2</sub>SO<sub>4</sub>) and evaporated to dryness to yield the crude product, which was purified via column-chromatography using silica gel and ethyl acetate:hexane (20:80 v/v) as eluent to give 1-aminocoronene as an orange powder (170 mg, 0.54 mmol, 62 %). <sup>1</sup>H NMR (DMSO-D<sub>6</sub>, 500 MHz): δ 9.20 (d, 1H, *J* = 10 Hz), 8.99–8.80 (m, 8H), 8.71 (d, 1H, *J* = 10 Hz), 8.11 (s, 1H), 6.70 (s, 2H) ppm. <sup>13</sup>C NMR (CDCl<sub>3</sub>, 125 MHz): δ 151.21, 148.32, 132.87, 131.96, 131.12, 130.58, 129.75, 128.37, 126.46, 124.27, 122.34, 121.14, 120.84 ppm. HRMS-ESI (*m/z*): [M+H]<sup>+</sup> calcd. for C<sub>24</sub>H<sub>14</sub>N, 316.1126; found 316.1149 (Figure S1).

#### **General synthetic procedure for 2, 3, 2D and 3D:**

1-Aminocoronene (1 equiv.), bromoaromatic hydrocarbon (2 equiv.), tris(dibenzylideneacetone)dipalladium (0.01 equiv.), sodium *t*-butoxide (1 equiv.) and tri-*t*-butylphosphine (0.04 equiv.) were stirred under nitrogen and heated under reflux at 110 °C overnight. After completion of the reaction, ethyl acetate was added to the mixture and washed with brine solution. The organic layer was dried with anhydrous Na<sub>2</sub>SO<sub>4</sub> and evaporated to yield the crude product.

#### ***N,N*-diphenylcoronen-1-amine (2):**

After aforementioned procedure 1, by using 1-aminocoronene (80 mg, 0.25 mmol, 1.0

equiv.) and 1-bromobenzene (83 mg, 0.53 mmol, 2.1 equiv.) as bromoaromatic hydrocarbon in toluene (3 mL), the resulting crude product was purified via column chromatography (silica gel, dichloromethane (DCM)/hexane; 5:95 v/v as eluent) to give **2** as a yellowish powder (82 mg, 0.17 mmol, 69%). The resulting **2** was purified through vacuum sublimation. <sup>1</sup>H NMR (CDCl<sub>3</sub>, 500 MHz): δ 9.01 (d, 1H, *J* = 10 Hz), 8.87–8.82 (m, 7H), 8.78–8.71 (m, 3H), 7.27–7.25 (m, 6H), 7.02–6.99 (m, 4H) ppm; <sup>13</sup>C NMR (CDCl<sub>3</sub>, 125 MHz): δ 149.20, 142.37, 129.67, 129.41, 128.96, 128.74, 127.07, 127.06, 126.70, 126.63, 126.41, 126.37, 126.34, 126.27, 126.01, 122.87, 122.49, 122.05 ppm; HRMS-ESI (m/z): [M]<sup>+</sup> calcd. for C<sub>36</sub>H<sub>21</sub>N, 467.16740; found 467.16875 (Figure S2); analysis (calcd., found for C<sub>36</sub>H<sub>21</sub>N): C (92.48, 92.52); H (4.53, 4.52); N (3.00, 3.12).

***N,N*-di(9*H*-fluoren-2-yl)coronen-1-amine (**3**):**

After aforementioned procedure 1, by using 1-aminocoronene (80 mg, 0.25 mmol, 1.0 equiv.) and 2-bromo-9*H*-fluorene (130 mg, 0.53 mmol, 2.1 equiv.) as bromoaromatic hydrocarbon in toluene (3 mL), the resulting crude product was purified via column chromatography (silica gel, DCM/hexane; 5:95 v/v as eluent) to give **3** as a yellowish powder (108 mg, 0.17 mmol, 66%). The resulting **3** was purified through vacuum sublimation. <sup>1</sup>H NMR (CDCl<sub>3</sub>, 500 MHz): δ 9.08 (d, *J* = 10 Hz, 1H), 8.93–8.85 (m, 7H), 8.81–8.76 (m, 3H), 7.70 (t, *J* = 10 Hz, 4H), 7.46 (d, *J* = 10 Hz, 2H), 7.41 (s, 2H), 7.36–7.32 (m, 4H), 7.24 (t, *J* = 10 Hz, 2H), 3.75 (s, 4H) ppm; <sup>13</sup>C NMR (CDCl<sub>3</sub>, 125 MHz): 148.80, 144.95, 143.13, 142.84, 141.74, 136.19, 129.70, 128.93, 128.68, 126.98, 126.89, 126.82, 126.70, 126.65, 126.39, 126.33, 126.20, 125.93, 124.99, 124.78, 123.00, 121.90, 120.73, 119.60, 119.36, 37.08 ppm; HRMS (m/z): [M]<sup>+</sup> calcd. for C<sub>50</sub>H<sub>29</sub>N, 643.23000; found 643.23420 (Figure S3); analysis (calcd., found for C<sub>50</sub>H<sub>29</sub>N): C (93.28, 93.35), H

(4.54, 4.60), N (2.18, 2.37).

#### **Deuteration of 1-aminocoronene:**

1-Aminocoronene (200 mg, 0.63 mmol, 1 equiv.) was charged with 10% Pd-C (150 mg) and D<sub>2</sub>O (30 mL) in a 50-mL teflon-lined autoclave at 250 °C for 12 h. The internal pressure using the container and the solution reached 4–5 MPa. After gradual cooling to room temperature, the D<sub>2</sub>O phase was extracted using ethyl acetate (30 mL × 3) and dried over Na<sub>2</sub>SO<sub>4</sub>. Solvent evaporation gave the crude deuterated 1-aminocoronene. Crude product was purified using column-chromatography (silica gel, ethyl acetate:hexane; 20:80 v/v) to afford deuterated 1-aminocoronene (182 mg, 0.55 mmol, 87 %). <sup>1</sup>H NMR analysis indicates that the deuteration yield was 98% (Figure S4). HRMS-ESI (m/z): [M]<sup>+</sup> calcd. for C<sub>24</sub>D<sub>13</sub>N, 328.18; found, 327.13 (Figure S4c) (overall deuteration yield 93%).

#### ***N,N*-diphenylcoronen-1-amine-*d*<sub>11</sub> (**2D**):**

After aforementioned procedure 1, by using deuterated 1-aminocoronene (30 mg, 0.091 mmol, 1.0 equiv.) and 1-bromobenzene (30 mg, 0.19 mmol, 2.0 equiv.) as bromoaromatic hydrocarbon in toluene (1 mL), the resulting crude product was purified via column chromatography (silica gel, DCM/hexane; 5:95 v/v as eluent) to give **2D** as a yellowish powder (35 mg, 0.073 mmol, 80%). The resulting **2D** was purified through vacuum sublimation. <sup>1</sup>H NMR (CDCl<sub>3</sub>, 500 MHz): δ 9.03 (d, 0.02H, *J* = 10 Hz), 8.89–8.84 (m, 0.14H), 8.78–8.73 (m, 0.06H), 7.27–7.25 (m, 6H), 7.02–6.99 (m, 4H) ppm; <sup>13</sup>C NMR (CDCl<sub>3</sub>, 125 MHz): δ 148.82, 141.77, 129.67, 129.41, 128.96, 128.74, 127.07, 127.06, 126.70, 126.63, 126.41, 126.37, 126.34, 126.27, 125.41, 122.29, 121.99, 121.95 ppm; <sup>1</sup>H

NMR analysis showed that the deuteration yield was 98% (Figure S5). HRMS-ESI (m/z): [M]<sup>+</sup> calcd. for C<sub>36</sub>H<sub>10</sub>D<sub>11</sub>N, 478.23; found 477.35 (Figure S5c) (deuteration yield in coronene was 93%).

***N,N*-di(9*H*-fluoren-2-yl)coronen-1-amine-*d*<sub>11</sub> (3D):**

After aforementioned procedure 1, by using deuterated 1-aminocoronene (90 mg, 0.27 mmol, 1.0 equiv.) and 2-bromo-9*H*-fluorene (132 mg, 0.54 mmol, 2.0 equiv.) as bromoaromatic hydrocarbon in toluene (1 mL), the resulting crude product was purified via column chromatography (silica gel, DCM/hexane; 5:95 v/v as eluent) to give **3D** as a yellowish powder (119 mg, 0.18 mmol, 66%). The resulting **3D** was purified through vacuum sublimation. <sup>1</sup>H NMR (CDCl<sub>3</sub>, 500 MHz): δ 9.08 (d, 0.02H, *J* = 10 Hz), 8.93–8.85 (m, 0.14H), 8.81–8.76 (m, 0.05H), 7.70 (t, 4H, *J* = 10 Hz), 7.46 (d, 2H, *J* = 10 Hz), 7.41 (s, 2H), 7.36–7.32 (m, 4H), 7.24 (t, 2H, *J* = 10 Hz), 3.75 (s, 4H) PPM. <sup>13</sup>C NMR (CDCl<sub>3</sub>, 125 MHz): 148.34, 144.42, 142.73, 142.28, 141.18, 136.19, 129.70, 128.93, 127.99, 126.54, 126.13, 126.24, 126.70, 126.65, 126.39, 126.33, 126.20, 125.93, 124.99, 124.78, 123.00, 121.90, 120.73, 119.60, 119.36, 37.08 ppm; <sup>1</sup>H NMR analysis showed that the deuteration yield was 98% (Figure S6). HRMS-ESI (m/z): [M]<sup>+</sup> calcd. for C<sub>50</sub>H<sub>18</sub>D<sub>11</sub>N, 654.30; found, 653.29 (Figure S6c) (deuteration yield in coronene was 92%).

## S2. Measurement procedure of $\Phi_{isc}(RT)$

The measurement of the intersystem crossing yield from the lowest singlet excited state ( $S_1$ ) to the triplet states at RT [ $\Phi_{isc}(RT)$ ] by using the triplet–triplet (T–T) energy transfer from a triplet sensitizer as a donor to  $\beta$ -carotene as an acceptor has been reported in reference 32 in the main text.  $\Phi_{isc}(RT)$  of **2**, **3**, **2D** and **3D** in benzene was determined by a method of T–T energy transfer using a sample and a reference solution. The sample solution contained one of the synthesized chromophores (**2**, **3**, **2D** and **3D**) as a triplet sensitizer and  $\beta$ -carotene ( $5 \times 10^{-4}$  M) as an acceptor in benzene. In the reference solution, benzophenone was used as a triplet sensitizer and  $\beta$ -carotene ( $5 \times 10^{-4}$  M) was used as an acceptor in benzene. In all cases, the absorbance at 355 nm, which was caused by the triplet sensitizer of the sample and reference solutions, was set to 1.0 in a 1-mm-thick quartz cell. The solutions were degassed using the freeze–dry pump method three times and sealed immediately before the measurements.

The transient absorption of the sample and reference solution was measured by using a sub-nanosecond transient absorption spectrophotometer (picoTAS, Unisoku, Osaka, Japan) with a 355-nm Q-switched microchip laser (PNV–M02510–1 $\times$ 0, Teem Photonics, Meylan, France). For the sample solutions, values of  $A$ ,  $B$ ,  $\tau_1$  and  $\tau_2$  were determined from the fitting data of Figure S9 using  $A(1-\exp(-t/\tau_1))\exp(-t/\tau_2) + B\exp(-t/\tau_1)$  equation, where  $t$  is the time after irradiation of an excitation pulse at 355 nm.

The efficiency of the energy transfer from the lowest triplet excited state ( $T_1$ ) of the triplet sensitizer to  $T_1$  of  $\beta$ -carotene ( $\Phi_{TT}$ ) in the benzene solution was calculated by using  $\Phi_{TT} = (\tau_0 - \tau_1)/\tau_0$ , where  $\tau_0$  and  $\tau_1$  are the triplet lifetimes of the sensitizer in the absence and presence of  $\beta$ -carotene, respectively. For all chromophores,  $\tau_0$  was obtained as the average lifetime of the decay data in Figure S10. Figure S11 shows that the changes in

transient absorption decay were caused by T–T energy transfer from a triplet sensitizer to  $\beta$ -carotene.  $\Phi_{\text{isc}}(\text{RT})$  in benzene of all the chromophores was determined based on  $\Phi_{\text{isc}}(\text{RT}) = \alpha A / \Phi_{\text{TT}}$ , where  $\alpha$  is a constant when the optics and excitation power at 355 nm were unchanged between the sample and the reference solution. Because  $\Phi_{\text{isc}}(\text{RT})$  of benzophenone as a triplet sensitizer in the reference solution tends to be 1, the value of  $\alpha$  is determined by using  $\Phi_{\text{isc}}(\text{RT}) = 1$ ,  $A$  and  $\Phi_{\text{TT}}$  of the reference solution. Because the optics and excitation conditions used in the reference solution were unaltered before the measurement of the sample solutions,  $\Phi_{\text{isc}}(\text{RT})$  of all chromophores in benzene was determined by substituting  $A$  and  $\Phi_{\text{TT}}$  of the sample solution and the determined  $\alpha$  into  $\Phi_{\text{isc}}(\text{RT}) = \alpha A / \Phi_{\text{TT}}$ . The values of  $A$ ,  $B$ ,  $\tau_0$  and  $\tau_1$  to determine  $\Phi_{\text{isc}}(\text{RT})$  are provided in Table S1.



### S3. Theoretical analyses of optically measured $\Phi_{isc}(RT)$

To explain the tendency, we performed quantum chemical calculations regarding the rate constant of the internal conversion from  $S_1$  to  $S_0$  at RT [ $k_{ic}(RT)$ ], and the intersystem crossing from the  $S_1$  to triplet states at RT [ $k_{isc}(RT)$ ] for **1-4**.  $k_{ic}(RT)$  is expressed by using a multiplication of the vibronic coupling constant between  $S_1$  and  $S_0$  ( $V_k$ ) and the energy difference between  $S_1$  and  $S_0$  ( $E_{10}$ ).<sup>S1,S2</sup>

$$k_{ic}(RT) \approx 2\pi\Sigma(P(RT)V_k^2/E_{10}^2)=2\pi\Sigma P(RT)R_k, \quad (S1)$$

where  $P(RT)$  is the vibrational factor. We calculated values of  $V_k^2$  for **1-4** (Figure S13) and  $\Sigma V_k^2/E_{10}^2$  ( $=\Sigma R_k$ ) is calculated by integrating the signals. The same magnitude of  $\Sigma R_k$  reasonably explains that  $k_{ic}(RT)$  is comparable for **1-4** when the radiationless process is based on the Franck–Condon process.

Next we analyzed  $k_{isc}(RT)$  of **1-4**.  $k_{isc}(RT)$  is generally expressed as,<sup>S3</sup>

$$k_{isc}(T) = \frac{2\pi}{\hbar} \sum_n |\langle S_1 | \hat{H}_{SO} | T_n \rangle|^2 \exp \left[ \frac{-(\lambda + \Delta E_{S_1-T_n})^2}{4\lambda k_B T} \right] / \sqrt{4\lambda k_B T}, \quad (S2)$$

where  $\hbar$  is the Planck constant,  $\langle S_1 | \hat{H}_{SO} | T_n \rangle^2$  is the spin-orbit coupling between  $S_1$  and  $T_n$ ,  $\lambda$  is the reorganization energy between  $S_1$  and  $T_n$ , and  $\Delta E_{S_1-T_n}$  is the energy difference between  $S_1$  and  $T_n$ . Figure S14 represents the relationship between  $\langle S_1 | \hat{H}_{SO} | T_n \rangle^2$  and  $\Delta E_{S_1-T_n}$  for **1-4**. In Eq. S2, when  $(\lambda + \Delta E_{S_1-T_n})$  approaches 0,  $k_{isc}(RT)$  becomes large. Typical  $\lambda$  changes associated with geometrical relaxations when switching from the equilibrium geometry of  $S_1$  to the transient geometries of  $T_n$  are of the order of  $< 0.3$  eV depending on the singlet-triplet pathway.<sup>S4</sup> When  $\lambda$  approaches 0 eV,

the ISC with  $\Delta E_{S_1-T_n}$  approaching 0 is dominant. When  $\lambda$  approaches 0.3 eV, the ISC with  $\Delta E_{S_1-T_n}$  approaching 0.3 is dominant for the ISC. Thus,  $\langle S_1 | \hat{H}_{S_0} | T_n \rangle^2$  in the range of  $\Delta E_{S_1-T_n} = -0.4 - +0.1$  eV (yellow background in Figure S14) is potentially large enough to affect the increase in  $k_{isc}(RT)$ , whereas  $\langle S_1 | \hat{H}_{S_0} | T_n \rangle^2$  is negligibly small when  $\Delta E_{S_1-T_n}$  lies outside this range. When we focus on **1**, no large  $\langle S_1 | \hat{H}_{S_0} | T_n \rangle^2$  appears in the range. However,  $\langle S_1 | \hat{H}_{S_0} | T_2 \rangle^2$  for **2** is in the range and  $\langle S_1 | \hat{H}_{S_0} | T_2 \rangle^2$  is large. For **3** and **4**,  $\langle S_1 | \hat{H}_{S_0} | T_1 \rangle^2$  and  $\langle S_1 | \hat{H}_{S_0} | T_2 \rangle^2$  are in the range and  $\langle S_1 | \hat{H}_{S_0} | T_1 \rangle^2$  and  $\langle S_1 | \hat{H}_{S_0} | T_2 \rangle^2$  are also large. Therefore, this reasonably explains the larger difference of  $k_{isc}(RT)$  between **1** and **2-4**.

The much larger  $\langle S_1 | \hat{H}_{S_0} | T_1 \rangle^2$  and  $\langle S_1 | \hat{H}_{S_0} | T_2 \rangle^2$  of **2-4** compared with **1** is reasonable. The large  $\langle S_1 | \hat{H}_{S_0} | T_2 \rangle^2$  of **2-4** could be explained by the general El-Sayed rule.<sup>S5</sup> The  $S_1-S_0$  transition has CT transition characteristics, whereas the  $T_2-S_0$  transition contains a local excited (LE) transition nature (Figure S15), which increases  $\langle S_1 | \hat{H}_{S_0} | T_2 \rangle^2$ . In **3** and **4**, the  $T_1-S_0$  transition has an LE nature. Because this is different from the moderate CT nature of the  $T_1-S_0$  transition,  $\langle S_1 | \hat{H}_{S_0} | T_1 \rangle^2$  is not small.

From these investigations, the twisted conjugated substituents to coronene increased  $k_f$  and  $k_{isc}(RT)$ , but hardly increased  $k_{ic}(RT)$  (A in Figure S16). For **2-4**,  $k_f \gg k_{ic}(RT)$  and  $k_{isc}(RT) \gg k_{ic}(RT)$  resulted in  $\Phi_f(RT) + \Phi_{isc}(RT) \approx 1$  and a large  $\Phi_{isc}(RT)$  could be obtained because  $k_{isc}(RT) > k_f \gg k_{ic}(RT)$  (Figure S16b-d). Although deuteration theoretically decreases  $k_{ic}(RT)$ , in **2** and **3**, the small  $k_{ic}(RT)$  compared with  $k_{isc}(RT)$  and  $k_f$  results in no distinct change in yield of internal conversion from  $S_1$  to  $S_0$  because we can estimate it is small. Therefore,  $\Phi_{isc}(RT)$  of **2** and **3** is hardly affected by deuteration. For **1**, however,  $k_f$ ,  $k_{ic}(RT)$  and  $k_{isc}(RT)$  become comparable because  $k_f$  is small as caused by a symmetrically forbidden fluorescence, and  $k_{isc}(RT)$  is also small because of the

planar structure (Figure S16a). Therefore, we consider that our directly measured values that are independent of the  $1-\Phi_{\text{I}}(\text{RT})$  internal conversion of coronene are reasonable.

#### S4. Measurement procedure of $\Phi_p(\text{RT})$

The following is an example of procedure to determine  $\Phi_p(\text{RT})$  of 0.3 wt% **3** or **3D**-doped amorphous  $\beta$ -estradiol film. The total yield of emission under excitation was measured by using a conventional integration sphere system in air (Hamamatsu, C9920-02G) (blue line in Figure S17a). Next, persistent RT emission (persistent TADF ( $p\text{TADF}$ ) +  $p\text{RTP}$ ) spectra for 20 ms soon after ceasing the excitation (green line in Figure S17a) was compared with the steady state emission spectra for 20 ms under excitation (blue line in Figure S17a) to determine the total yield of  $p\text{TADF}$  and  $p\text{RTP}$ . This is because  $p\text{TADF}$  and  $p\text{RTP}$  hardly decrease because of their long lifetime in the short time (20 ms). Then, the temperature dependence of persistent emission characteristics was measured using a cryostat to separate  $p\text{TADF}$  and  $p\text{RTP}$ . Because  $p\text{TADF}$  appears in the temperature more than 200K for **3** and **3D**, phosphorescence spectra at 180K was measured. The phosphorescence spectrum at 180K (orange in Figure S17b) was set along  $p\text{RTP} + p\text{TADF}$  spectrum in 600-750 nm (green in Figure S17b). The difference of log value between the phosphorescence intensity at 180K and  $p\text{RTP} + p\text{TADF}$  intensity was calculated from 600 nm to 750 nm. Minimized mean square values of the difference results in Figure S17c.  $p\text{TADF}$  spectrum (red in Figure S17c) could be obtained by subtracting the  $p\text{RTP}$  area (orange in Figure S17c) from  $p\text{RTP} + p\text{TADF}$  area (green in Figure S17c). By comparing each spectral area, the yield of prompt fluorescence,  $p\text{TADF}$ , and  $p\text{RTP}$  was determined.

For samples without  $p\text{TADF}$ , the separation  $p\text{TADF}$  from  $p\text{TADF} + p\text{RTP}$  was not necessary.  $p\text{RTP}$  spectral intensity for 20 ms soon after ceasing excitation was compared with steady state emission spectral intensity under the excitation to determine  $\Phi_p(\text{RT})$ .

### S5. Effect of RTP antenna to enhance $k_p$

In our previous report we showed the excellent correlation between the calculated and experimental  $k_p$  (Ref. 12 in the main text). The formula of  $k_p$ ,<sup>S6-S8</sup> was expressed approximately as (Refs. 12, 24 and 39 in the main text):

$$k_p \approx \sum_n (\lambda_n \times \mu_{S_n \rightarrow S_0})^2, \quad (\text{S3})$$

$$\lambda_n = \langle S_n | \hat{H}_{SO} | T_1 \rangle / E_{S_n - T_1}, \quad (\text{S4})$$

where  $\mu_{S_n \rightarrow S_0}$  is the transition dipole moment between the higher lying singlet excited state ( $S_n$ ) and  $S_0$ ,  $\langle S_n | \hat{H}_{SO} | T_1 \rangle$  is the SOC between  $S_n$  and  $T_1$  and  $E_{S_n - T_1}$  is the energy difference between  $S_n$  and  $T_1$ . In our previous report, we showed a strong correlation between experimental  $k_p$  and the calculated  $\sum_n (\lambda_n \times \mu_{S_n \rightarrow S_0})^2$  ((Refs. 12 and 24 in the main text)). Therefore, according to Eqs. S3 and S4, contributions of  $\mu_{S_n \rightarrow S_0}^2$  and  $\lambda_n^2$  were discussed for the change in  $k_p$  in **2** and **3**. For **2**, there was no significant contribution of  $(\lambda_n \times \mu_{S_n \rightarrow S_0})^2$  with  $n \geq 2$  to  $k_p$  ((i) in Figure S22a). However, a significant enhancement of  $(\lambda_n \times \mu_{S_n \rightarrow S_0})^2$  at  $S_3$  for **3** anchored the enhancement of  $k_p$  ((i) in Figure S22b). A question arises as to the focused  $S_3$  that is a dominant factor to enhance  $k_p$ ,  $\langle S_3 | \hat{H}_{SO} | T_1 \rangle^2$  in  $\lambda_n$  or  $\mu_{S_3 \rightarrow S_0}^2$ . There was almost negligible  $\langle S_3 | \hat{H}_{SO} | T_1 \rangle^2$  for **2** ((ii) in Figure S22a) whereas a large  $\langle S_3 | \hat{H}_{SO} | T_1 \rangle^2$  was visible in **3** ((ii) in Figure S22b). A comparison of the  $\mu_{S_3 \rightarrow S_0}^2$  for **2** and **3** indicated an enhancement of  $\mu_{S_3 \rightarrow S_0}^2$  in **3** compared with that of **2** ((iii) of Figure S22a,b). This result indicates that  $\langle S_3 | \hat{H}_{SO} | T_1 \rangle^2$

and  $\mu_{S_3 \rightarrow S_0}^2$  enhance  $k_p$  in **3** compared with **2**.

To establish the reason for the large difference in  $\langle S_3 | \hat{H}_{S_0} | T_1 \rangle^2$  and  $\mu_{S_3 \rightarrow S_0}^2$  between **2** and **3**, we analyzed the associated molecular orbital (MO) of these two chromophores. For **2**, MOs that relate to the  $S_3-S_0$  transition are delocalized mostly over the coronene part (A in Figure S22c) and those that relate to the  $T_1-S_0$  transition are located at the coronene part (B in Figure S22c). Therefore, similar local excited (LE) characteristics between the  $S_3-S_0$  and  $T_1-S_0$  transitions makes  $\langle S_3 | \hat{H}_{S_0} | T_1 \rangle^2$  forbidden ( $5.5 \times 10^{-3} \text{ cm}^{-2}$ ), which is the negligible contribution to the enhancement of  $k_p$ . For **3**, in contrast, a large overlap of MOs in fluorene substituents relates to the  $S_3-S_0$  transition, which indicates the LE transition nature (C in Figure S22d) whereas the  $T_1-S_0$  transition has a charge transfer character (D in Figure S22d). The different nature allows for efficient  $\langle S_3 | \hat{H}_{S_0} | T_1 \rangle^2$  ( $3.6 \times 10^{-1} \text{ cm}^{-2}$ ) according to the El-Sayed rule<sup>S5</sup> and enhances the  $k_p$ .  $\mu_{S_3 \rightarrow S_0}^2$  is small in **2** because of the small conjugation length of the RTP antenna, which led to the suppression of  $k_p$  (E in Figure S22c). However, a different scenario was observed for **3** because of the extension of the RTP antenna and increased conjugation length and a larger  $\mu_{S_3 \rightarrow S_0}^2$  resulted for the accelerating  $k_p$  (F in Figure S22d). The combination of  $\mu_{S_3 \rightarrow S_0}^2$  and  $\langle S_3 | \hat{H}_{S_0} | T_1 \rangle^2$  is the driving factor in the enhancement of  $k_p$  in **3** compared with that of **2**.

## S6. Supporting display items

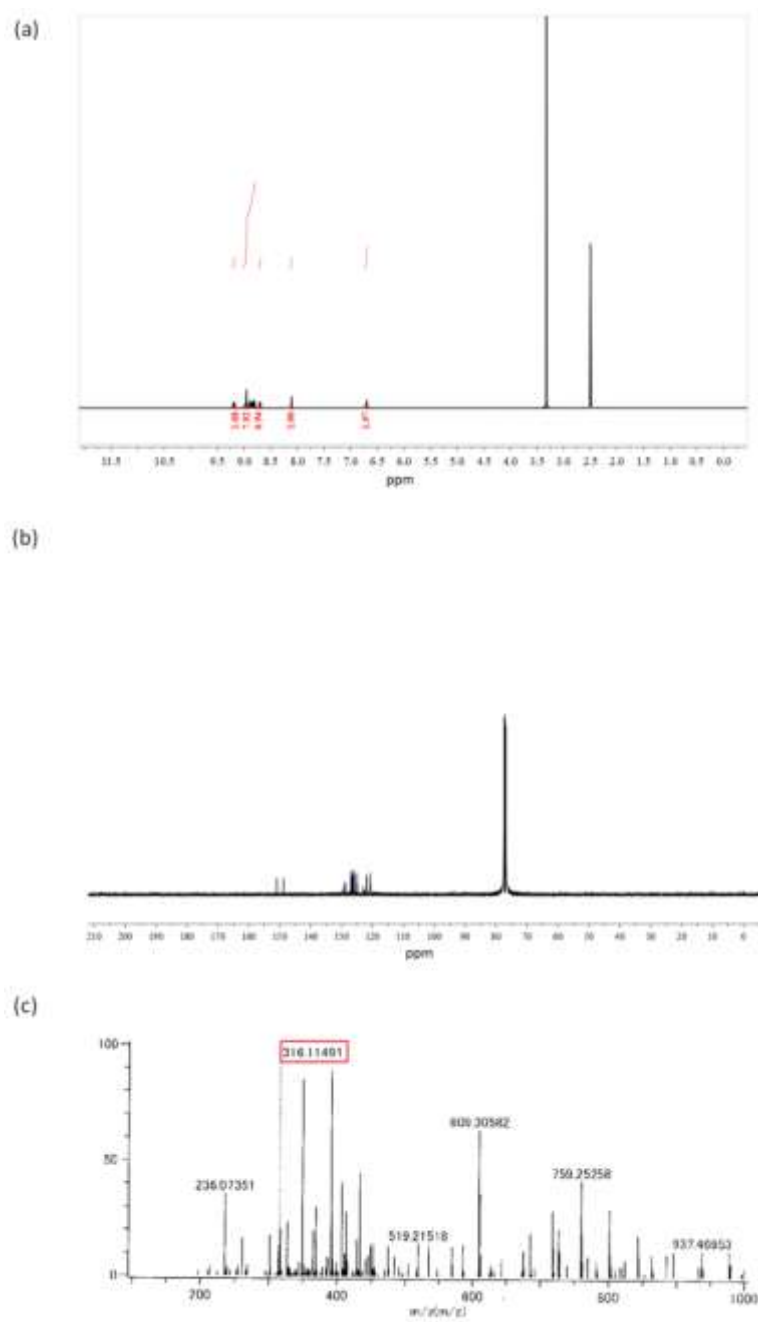

**Figure S1.** (a)  $^1\text{H}$  NMR (500 MHz in  $\text{DMSO-d}_6$  at RT), (b)  $^{13}\text{C}$  NMR (125 MHz in  $\text{CDCl}_3$  at RT) and (c) HRMS-ESI spectra of 1-aminocoronene.

(a)

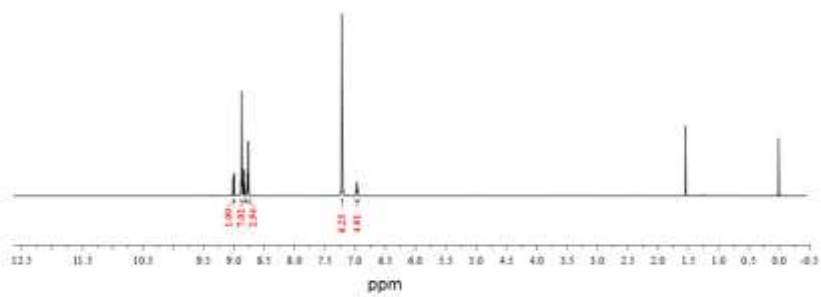

(b)

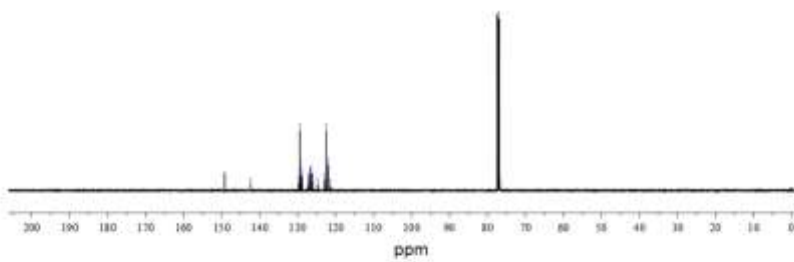

(c)

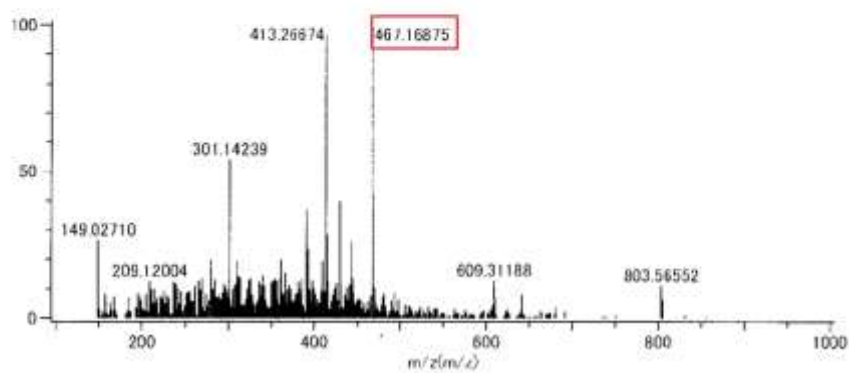

**Figure S2.** (a) <sup>1</sup>H NMR (500 MHz in CDCl<sub>3</sub> at RT), (b) <sup>13</sup>C NMR (125 MHz in CDCl<sub>3</sub> at RT) and (c) HRMS-ESI spectra of **2**.



(a)

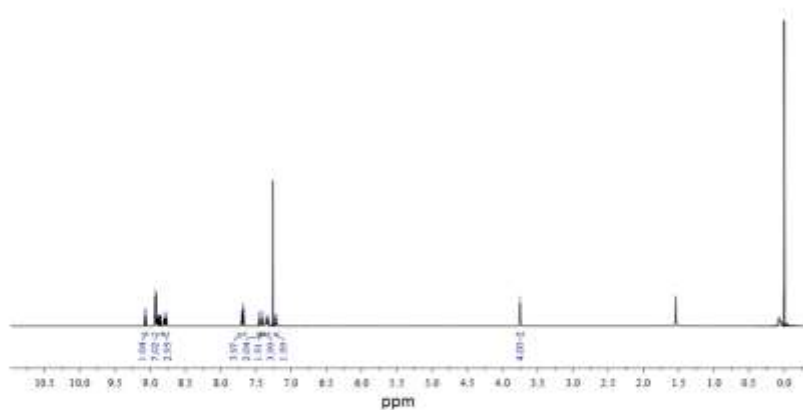

(b)

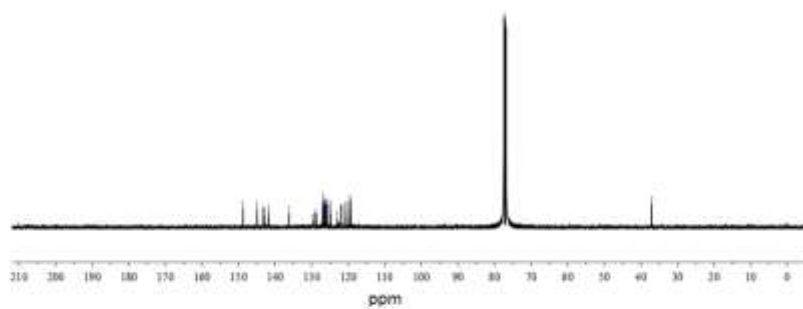

(c)

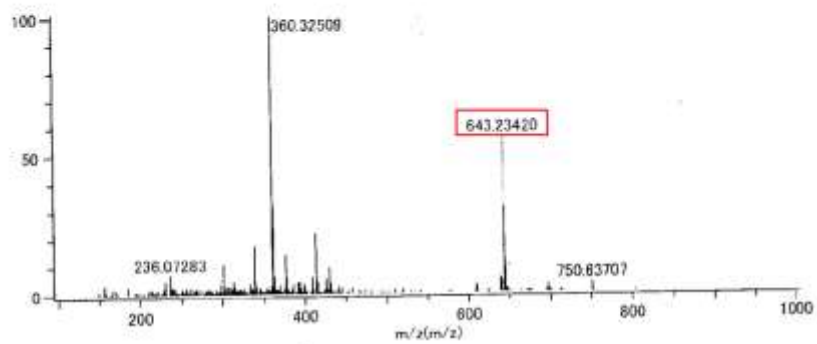

**Figure S3.** (a)  $^1\text{H}$  NMR (500 MHz in  $\text{CDCl}_3$  at RT), (b)  $^{13}\text{C}$  NMR (125 MHz in  $\text{CDCl}_3$  at RT) and (c) HRMS-ESI spectra of **3**.

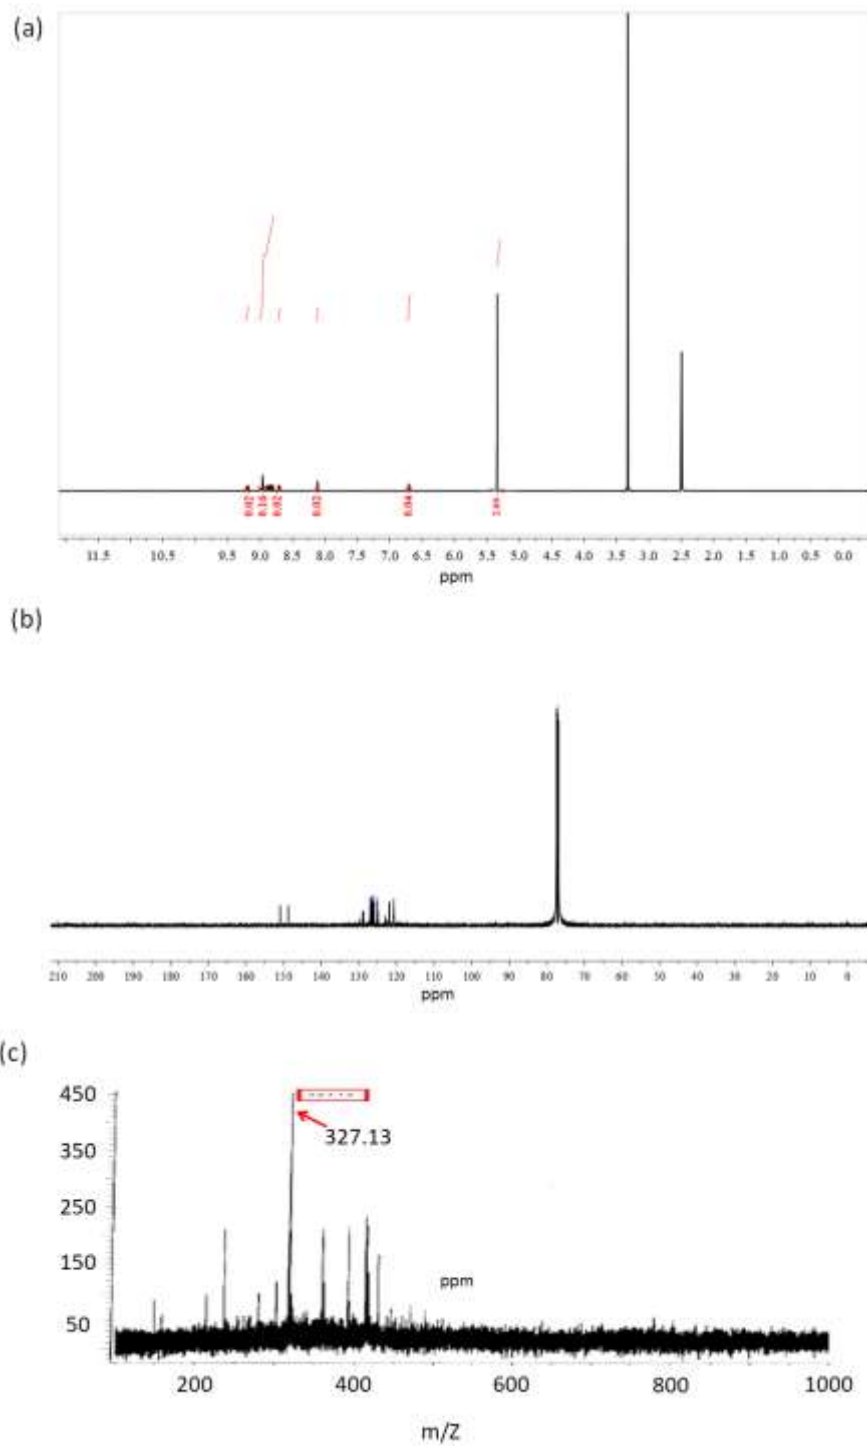

**Figure S4.** (a)  $^1\text{H}$  NMR (500 MHz in  $\text{DMSO-d}_6$  at RT), (b)  $^{13}\text{C}$  NMR (125 MHz in  $\text{CDCl}_3$  at RT) and (c) HRMS-ESI spectra of deuterated 1-aminocoronene.

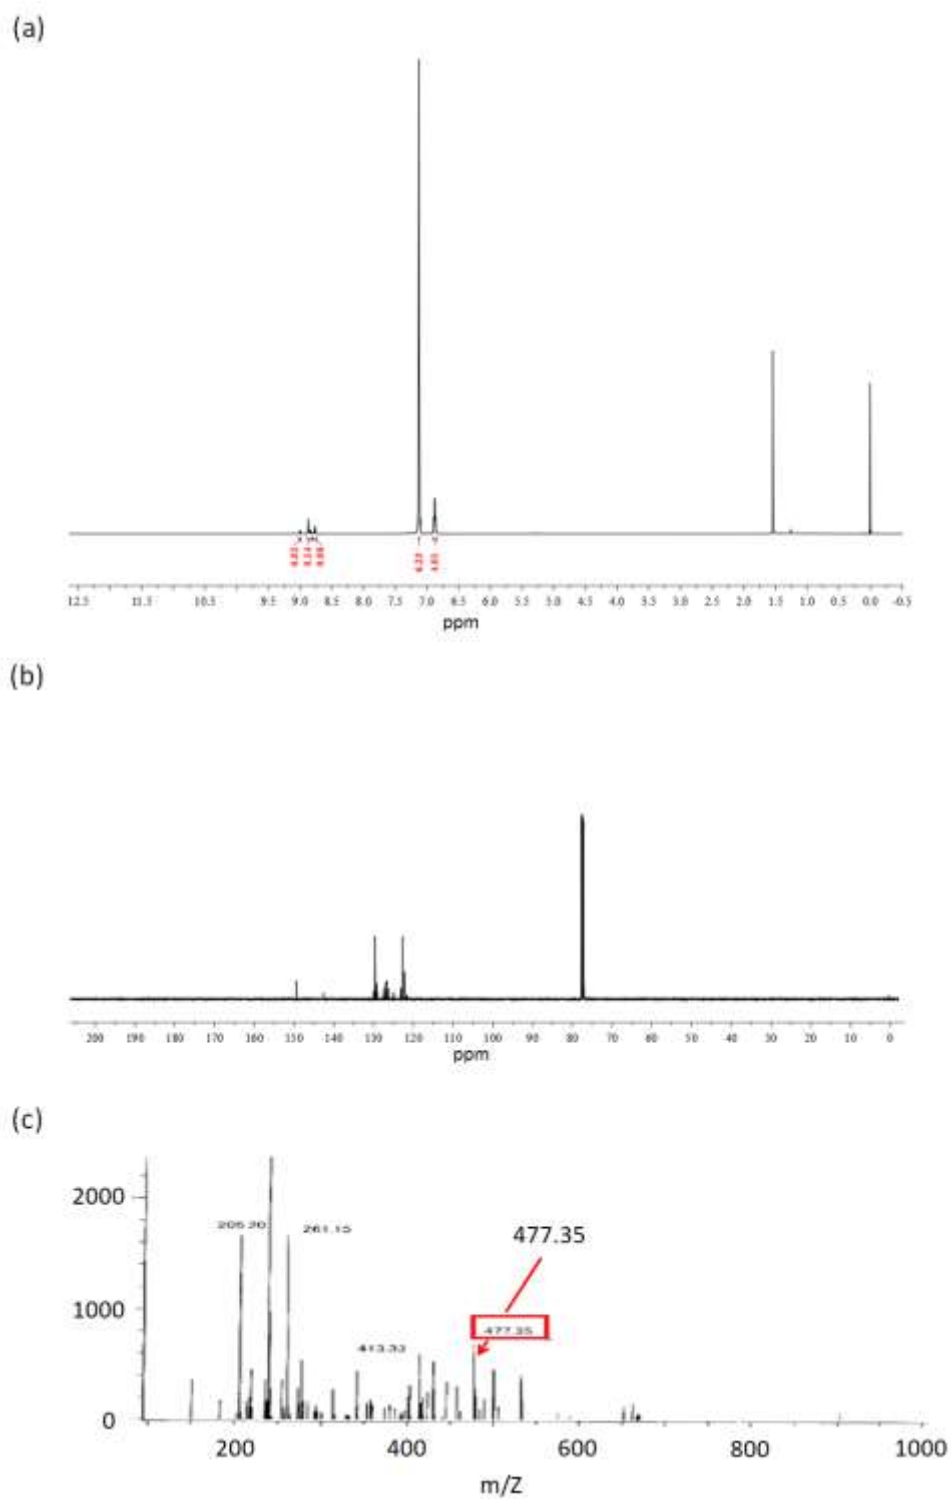

**Figure S5.** (a)  $^1\text{H}$  NMR (500 MHz in  $\text{CDCl}_3$  at RT), (b)  $^{13}\text{C}$  NMR (125 MHz in  $\text{CDCl}_3$  at RT and (c) HRMS-ESI spectra of **2D**.

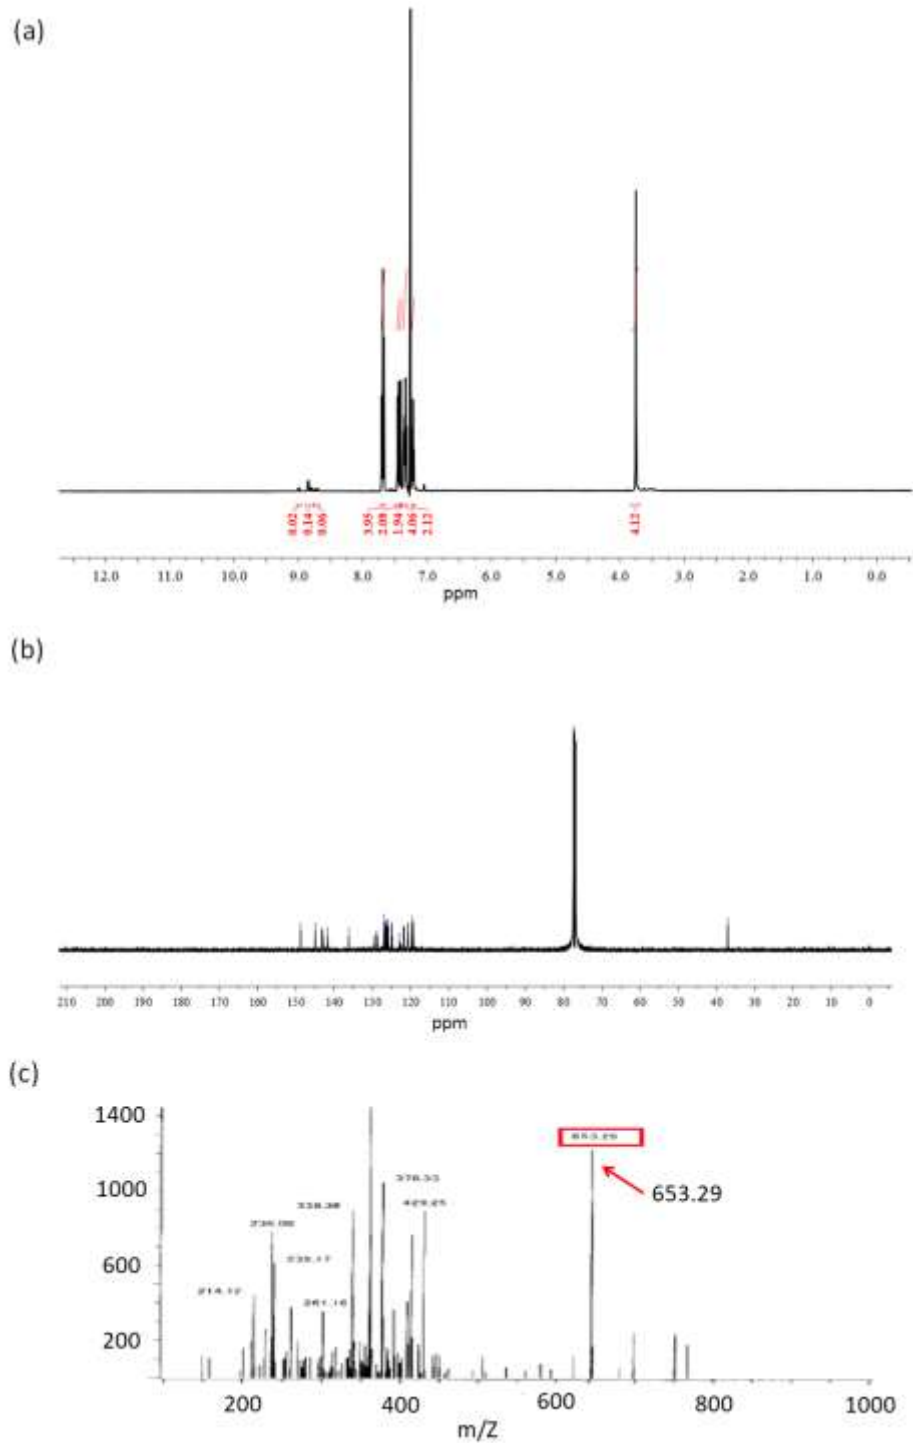

**Figure S6.** (a)  $^1\text{H}$  NMR (500 MHz in  $\text{CDCl}_3$  at RT), (b)  $^{13}\text{C}$  NMR (125 MHz in  $\text{CDCl}_3$  at RT and (c) HRMS-ESI spectra of **3D**.

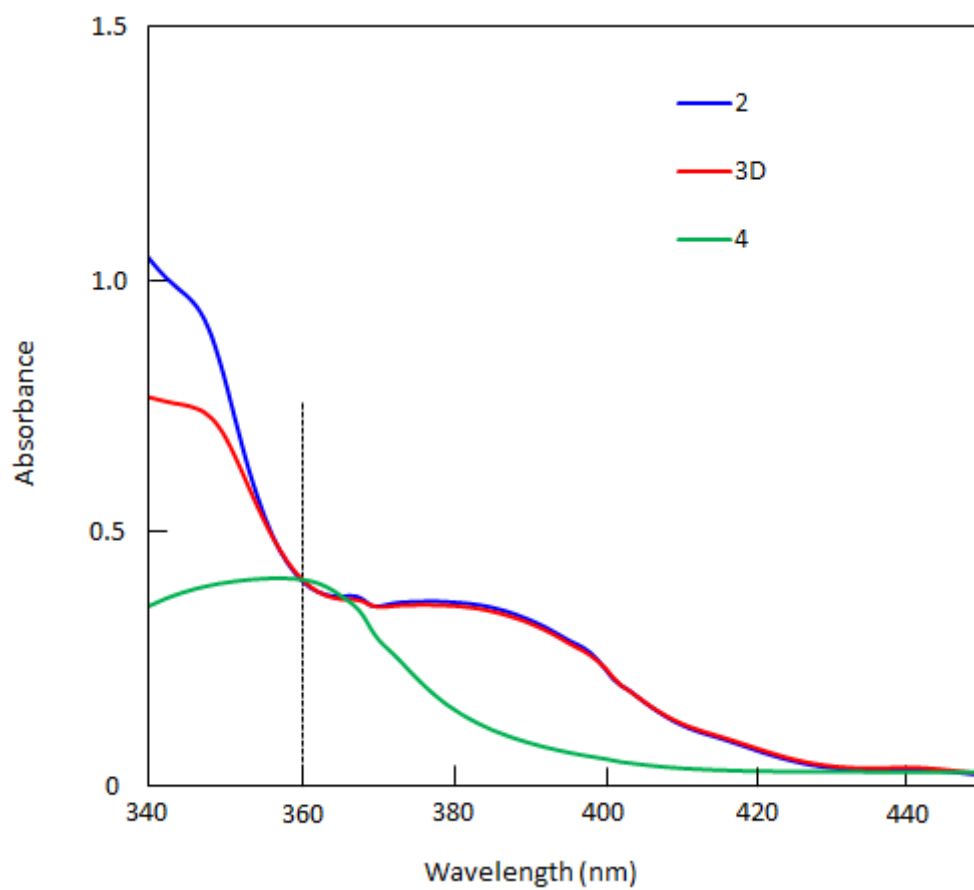

**Figure S7.** Absorbance spectra of **2**, **3D** and **4** used in demonstration in Figure 1c.

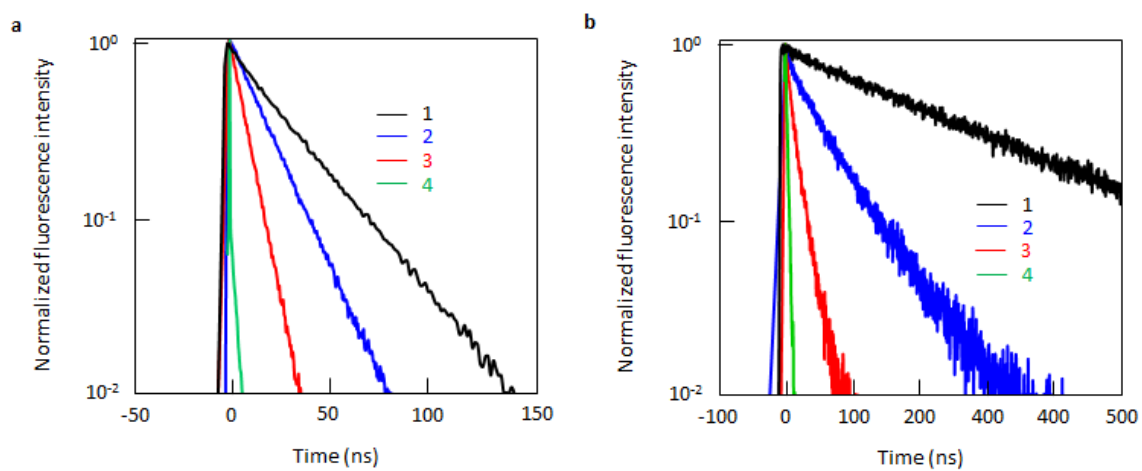

**Figure S8.** Fluorescence lifetime at RT of **1–4** in (a) toluene and (b)  $\beta$ -estradiol. Concentration of **1–4** in toluene is  $1 \times 10^{-5}$  M. Concentration of **1–4** in  $\beta$ -estradiol is 0.3 wt%.

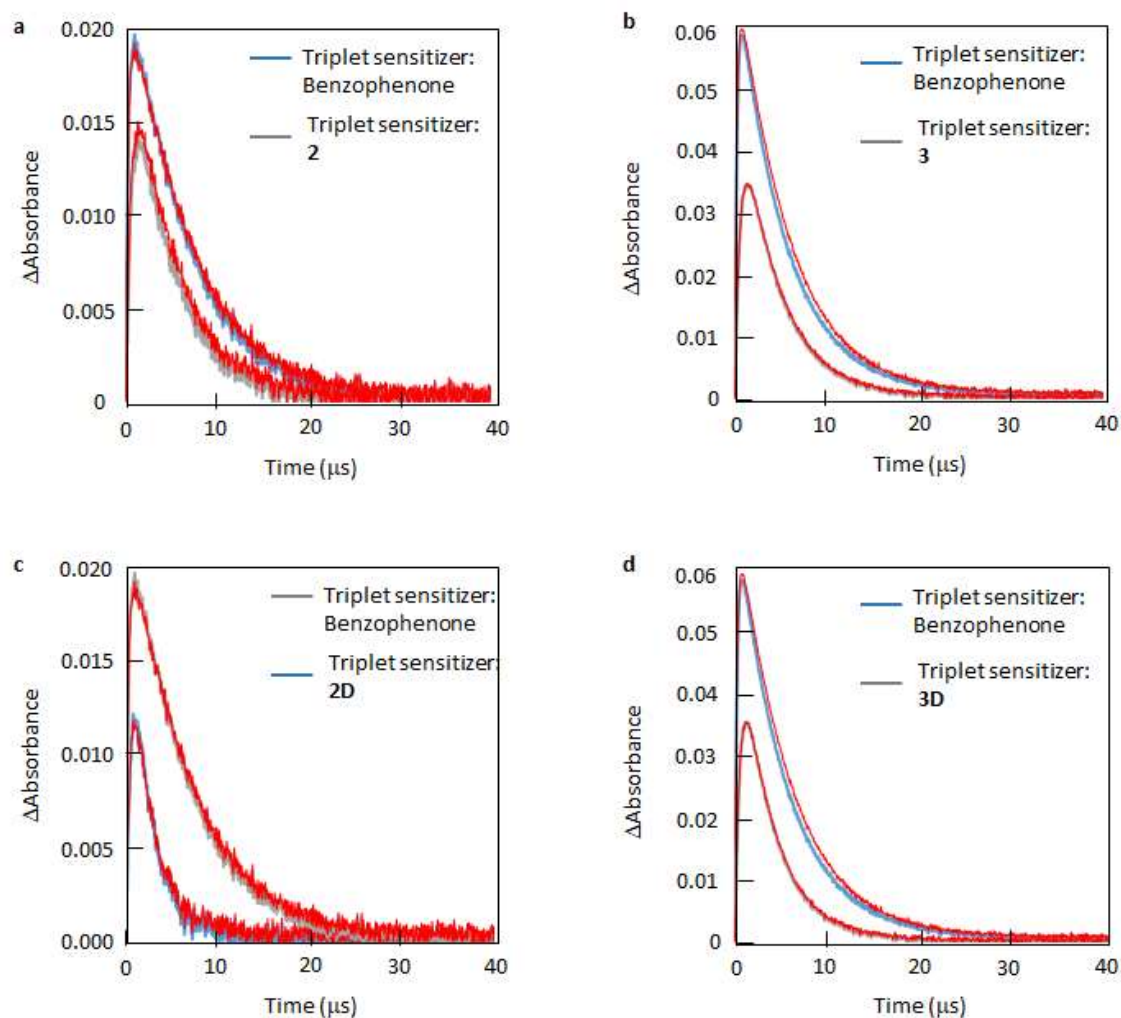

**Figure S9.** T–T absorption intensity changes at 530 nm of sample and reference solution. Sample solution contained one of the synthesized chromophores as triplet sensitizer and  $\beta$ -carotene as an acceptor in benzene. Reference solution contained benzophenone as triplet sensitizer and  $\beta$ -carotene as an acceptor in benzene. (a) Triplet sensitizer of sample solution **2**. (b) Triplet sensitizer of sample solution **3**. (c) Triplet sensitizer of sample solution **2D**. (d) Triplet sensitizer of sample solution **3D**.

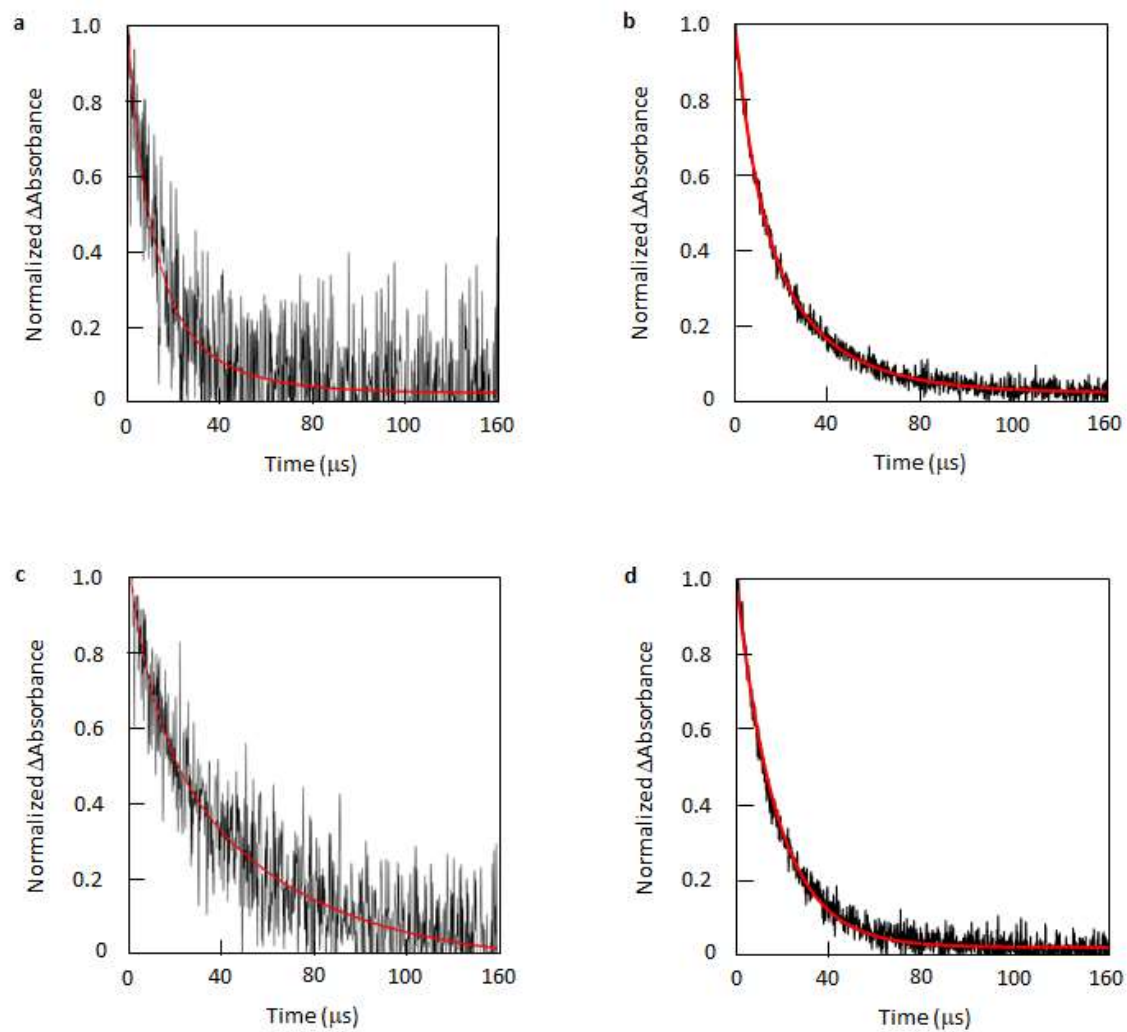

**Figure S10.** T–T absorption decay characteristics of chromophores in benzene solution.

(a) **2**. (b) **3**. (c) **2D** and (d) **3D**.



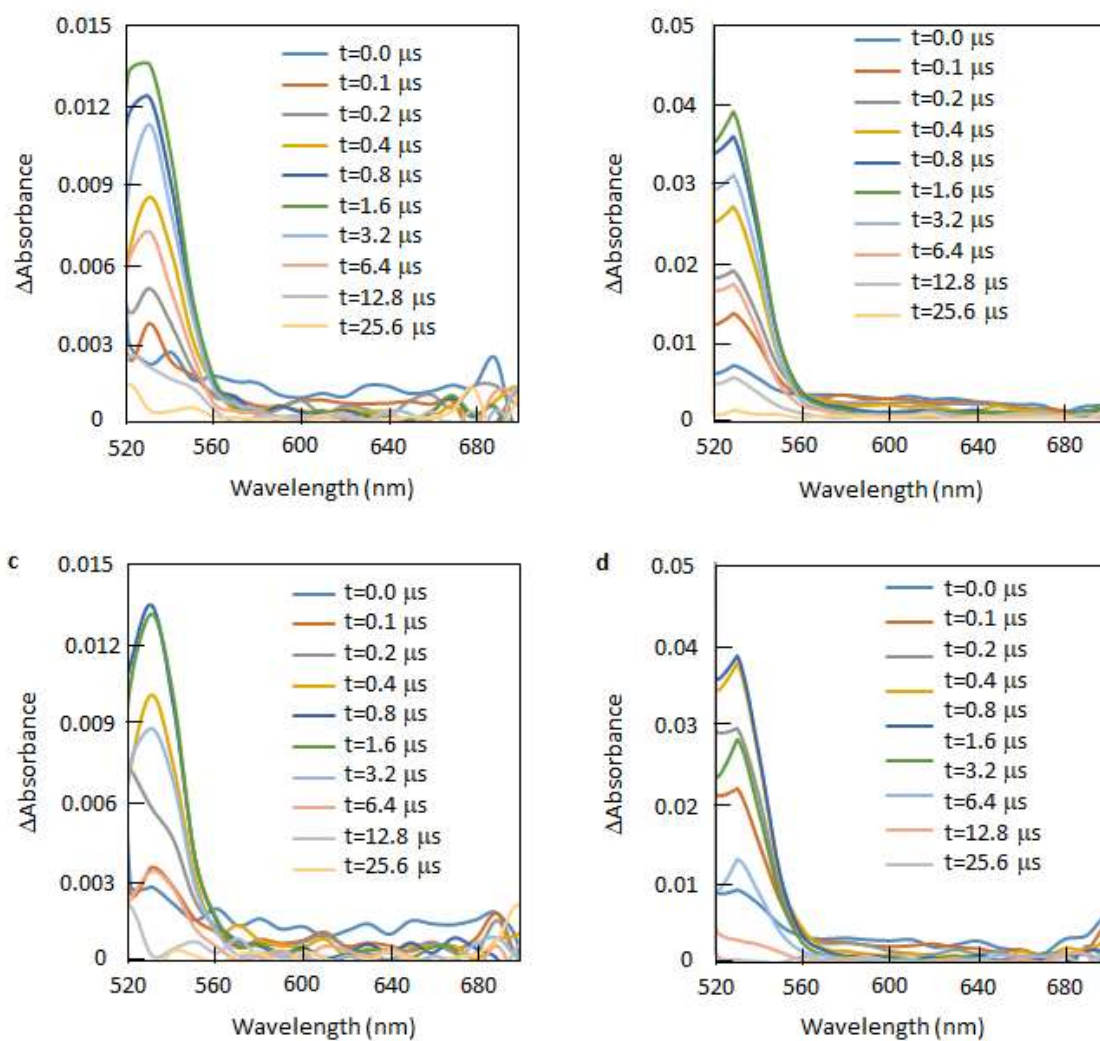

**Figure S11.** T–T absorption spectra changes of sample solution after excitation at 355 nm. Sample solution contains one synthesized chromophore, a triplet sensitizer and  $\beta$ -carotene, an acceptor in benzene. (a) Triplet sensitizer **2**. (b) Triplet sensitizer **3**. (c) Triplet sensitizer **2D**. (d) Triplet sensitizer **3D**.

**Table S1.** Parameters used to determine  $\Phi_{isc}(RT)$  of **2**, **3**, **2D** and **3D**.

| Role of the solution | Triplet sensitizer | Concentration of b-carotene (M) | <i>A</i> | <i>B</i> | $\tau_1$ ( $\mu$ s) | $\tau_0$ ( $\mu$ s) | $\Phi_{TT}$ | $\Phi_{isc}(RT)$ |
|----------------------|--------------------|---------------------------------|----------|----------|---------------------|---------------------|-------------|------------------|
| Sample               | <b>2</b>           | $5 \times 10^{-4}$              | 0.022    | 0.0017   | 0.729               | 14.8                | 0.95        | 0.88             |
| Reference            | Benzophenone       |                                 | 0.024    | 0.0031   | 0.324               | 3.92                | 0.92        |                  |
| Sample               | <b>3</b>           | $5 \times 10^{-4}$              | 0.057    | 0.0028   | 0.647               | 10.2                | 0.94        | 0.84             |
| Reference            | Benzophenone       |                                 | 0.069    | 0.0074   | 0.226               | 4.33                | 0.95        |                  |
| Sample               | <b>2D</b>          | $5 \times 10^{-4}$              | 0.21     | 0.0023   | 0.571               | 38.3                | 0.99        | 0.81             |
| Reference            | Benzophenone       |                                 | 0.24     | 0.0031   | 0.324               | 3.92                | 0.92        |                  |
| Sample               | <b>3D</b>          | $5 \times 10^{-4}$              | 0.061    | 0.0087   | 0.702               | 17.4                | 0.96        | 0.87             |
| Reference            | Benzophenone       |                                 | 0.069    | 0.0074   | 0.226               | 4.33                | 0.95        |                  |

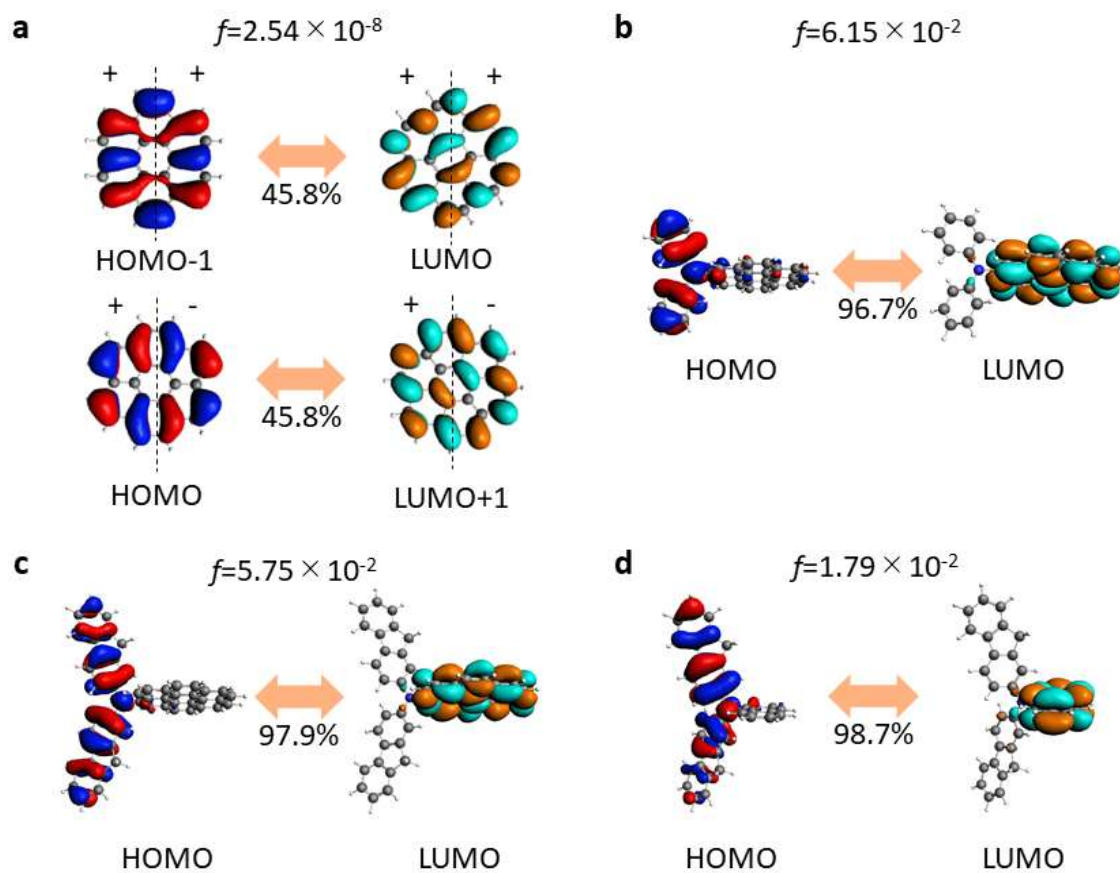

**Figure S12.** Molecular orbitals relating  $S_1$ – $S_0$  transition of **1** (a), **2** (b), **3** (c) and **4** (d). Structures were optimized at  $S_1$  geometry using TD-DFT (Gaussian09/B3LYP/6-31G(d)). Oscillator strength for  $S_1$ – $S_0$  transition ( $f$ ) calculated using ADF2017 with PBE0 functional and TZP basis set.

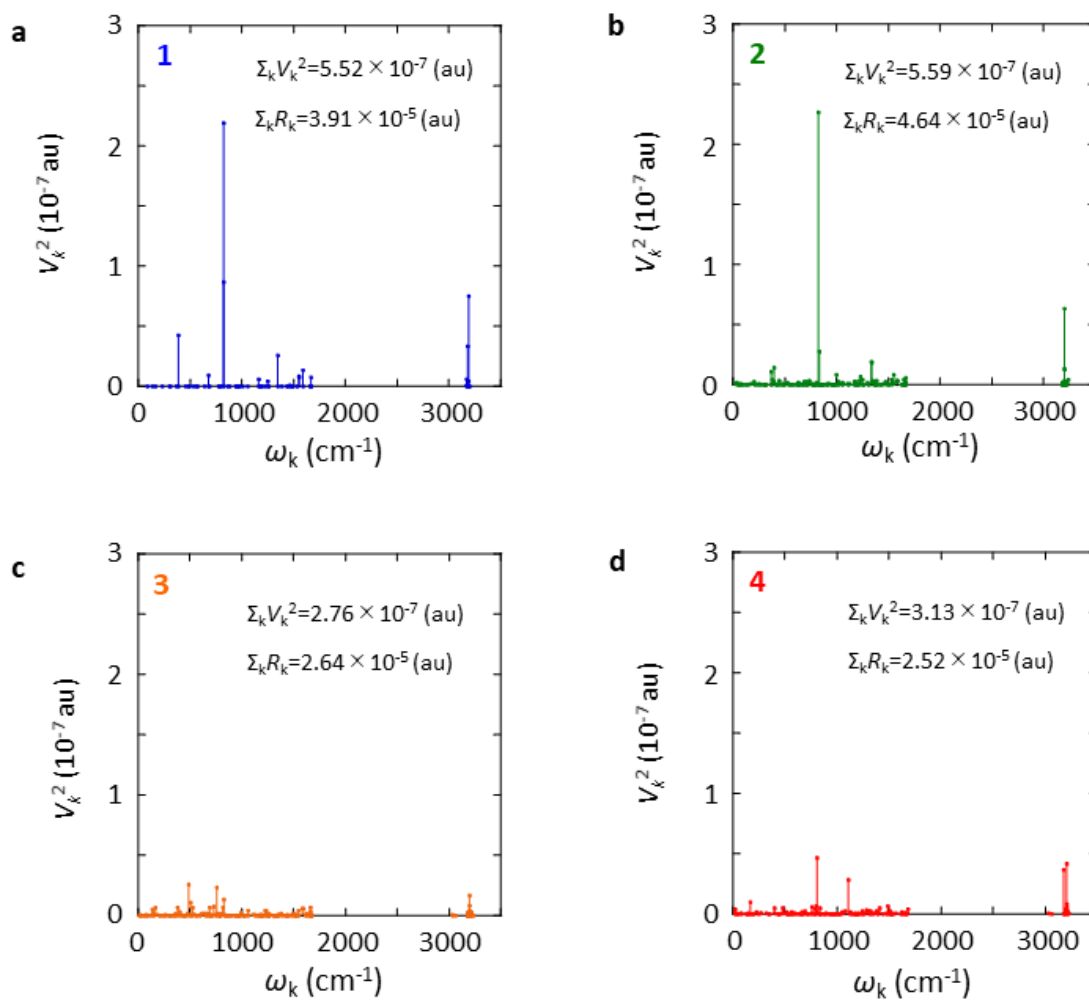

**Figure S13.** Vibronic coupling spectra regarding  $S_1-S_0$  transition of **1-4**. Calculation performed for  $S_0$  geometry using Gaussian09 with B3LYP functional and 6-31G(d) basis sets.

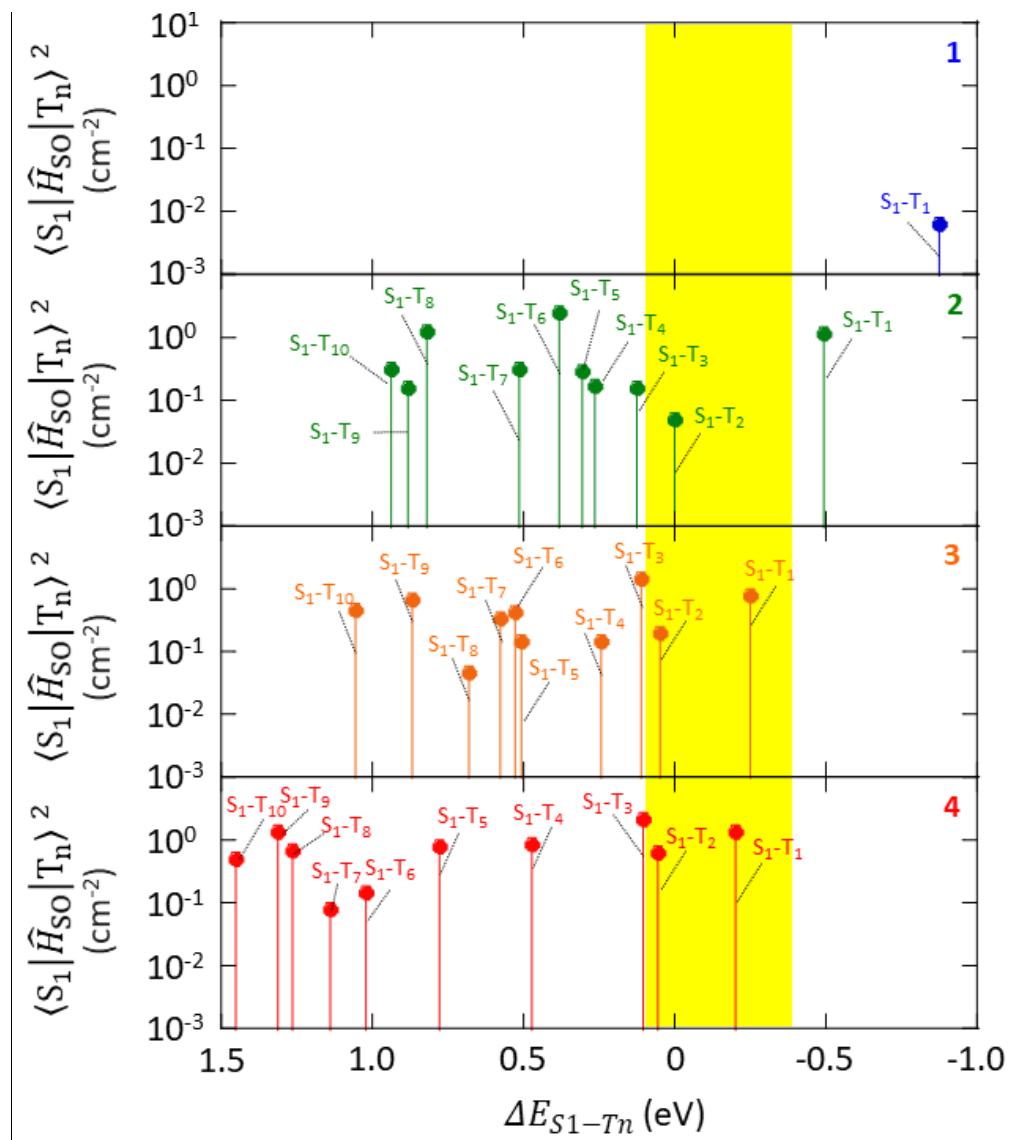

**Figure S14.** Relationship of  $\langle S_1 | \hat{H}_{SO} | T_n \rangle^2$  and  $\Delta E_{S_1-T_n}$  for **1-4**.  $S_1$  geometry optimized using Gaussian09 with B3LYP functional and 6-31G(d) basis sets. Geometries used to calculate  $\langle S_1 | \hat{H}_{SO} | T_n \rangle^2$  and  $\Delta E_{S_1-T_n}$  using ADF2017 with PBE0 functional and TZP basis sets.

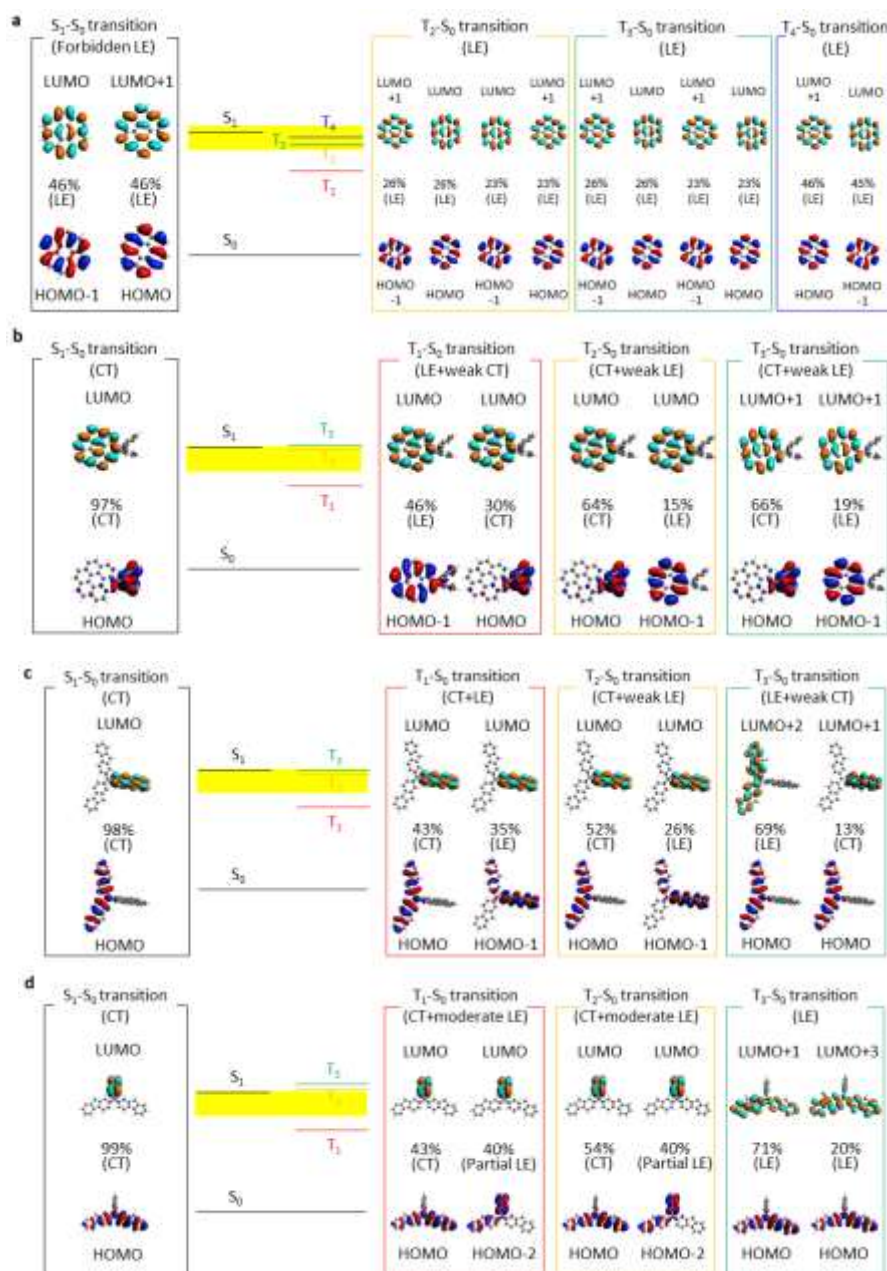

**Figure S15.** Molecular orbitals relating each transition of **1** (a), **2** (b), **3** (c) and **4** (d).  $S_1$  geometry is optimized using Gaussian09 with B3LYP functional and 6-31G(d) basis sets. The geometries are used to calculate  $\langle S_1 | \hat{H}_{SO} | T_n \rangle^2$  and  $\Delta E_{S_1-T_n}$  using ADF2017 with PBE0 functional and TZP basis sets.

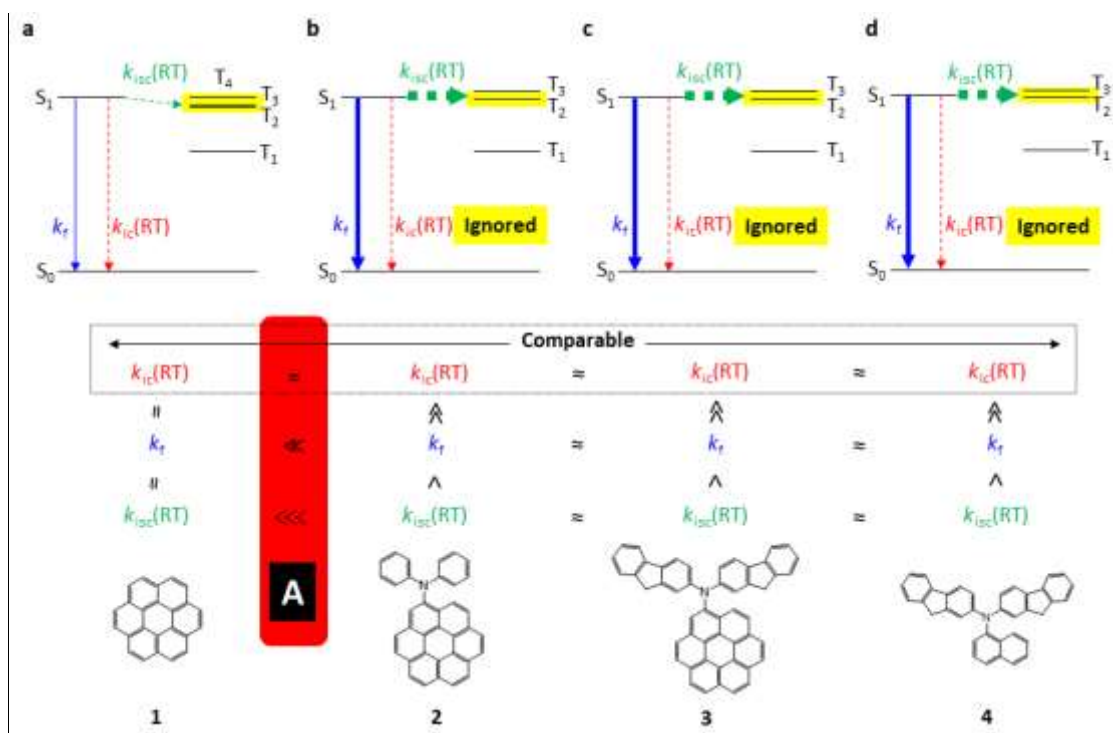

**Figure S16.** Summary of photophysical process from  $S_1$ .

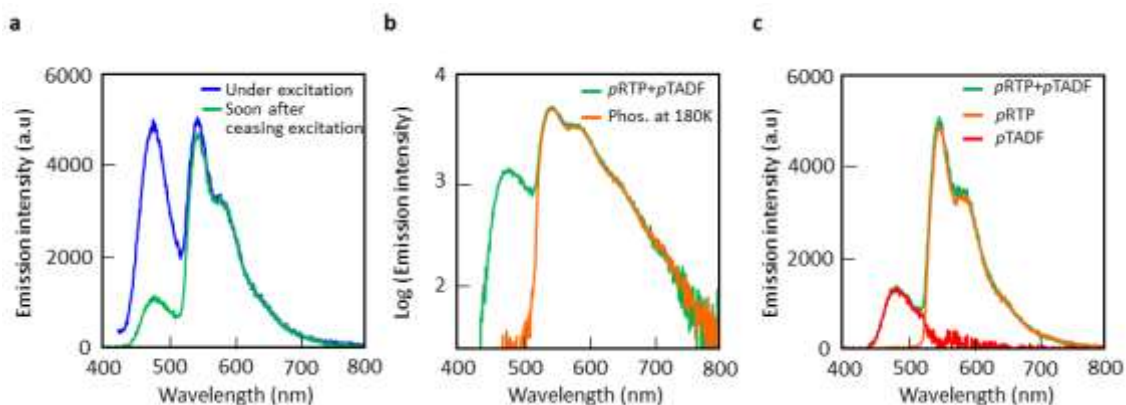

**Figure S17.** Emission spectra of 0.3 wt% **3**-doped amorphous  $\beta$ -estradiol film to explain how to separate prompt fluorescence,  $p$ RTP and  $p$ TADF. (a) Steady-state RT emission and afterglow RT emission spectra. Exposure time to detect the spectra is 20 ms. Blue: steady state RT emission under excitation at 360 nm. Green:  $p$ RTP+ $p$ TADF spectrum soon after ceasing excitation at 360 nm. (b) Log plot of persistent RT emission spectrum soon after ceasing excitation at 360 nm (green) and log plot of phosphorescence spectrum soon after ceasing excitation at 360 nm at 180K (orange). (c) Details of each component contained in persistent RT emission. Green:  $p$ RTP+ $p$ TADF spectrum soon after ceasing excitation at 360 nm. Orange: phosphorescence spectrum soon after ceasing excitation at 360 nm at 180K. Red:  $p$ TADF spectrum soon after ceasing excitation at 360 nm.



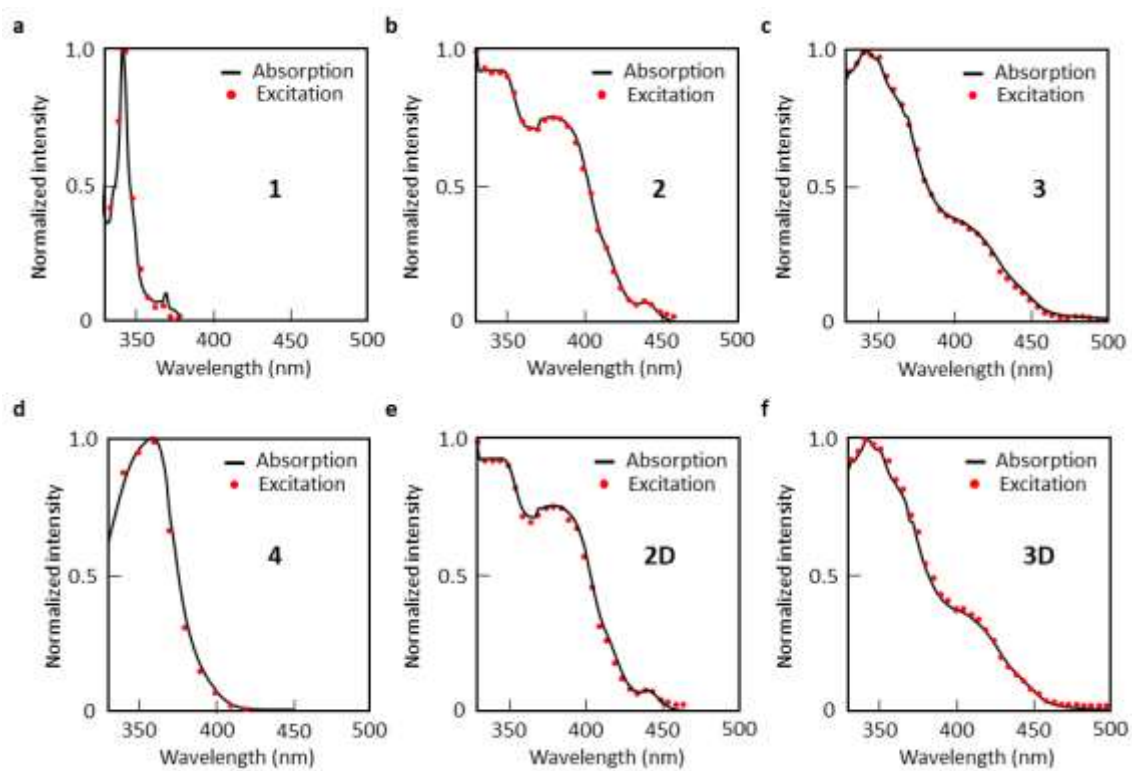

**Figure S18.** Excitation spectra of 0.3 wt% chromophore-doped amorphous  $\beta$ -estradiol.

(a) 1, (b) 2, (c) 3, (d) 4, (e) 2D and (f) 3D.

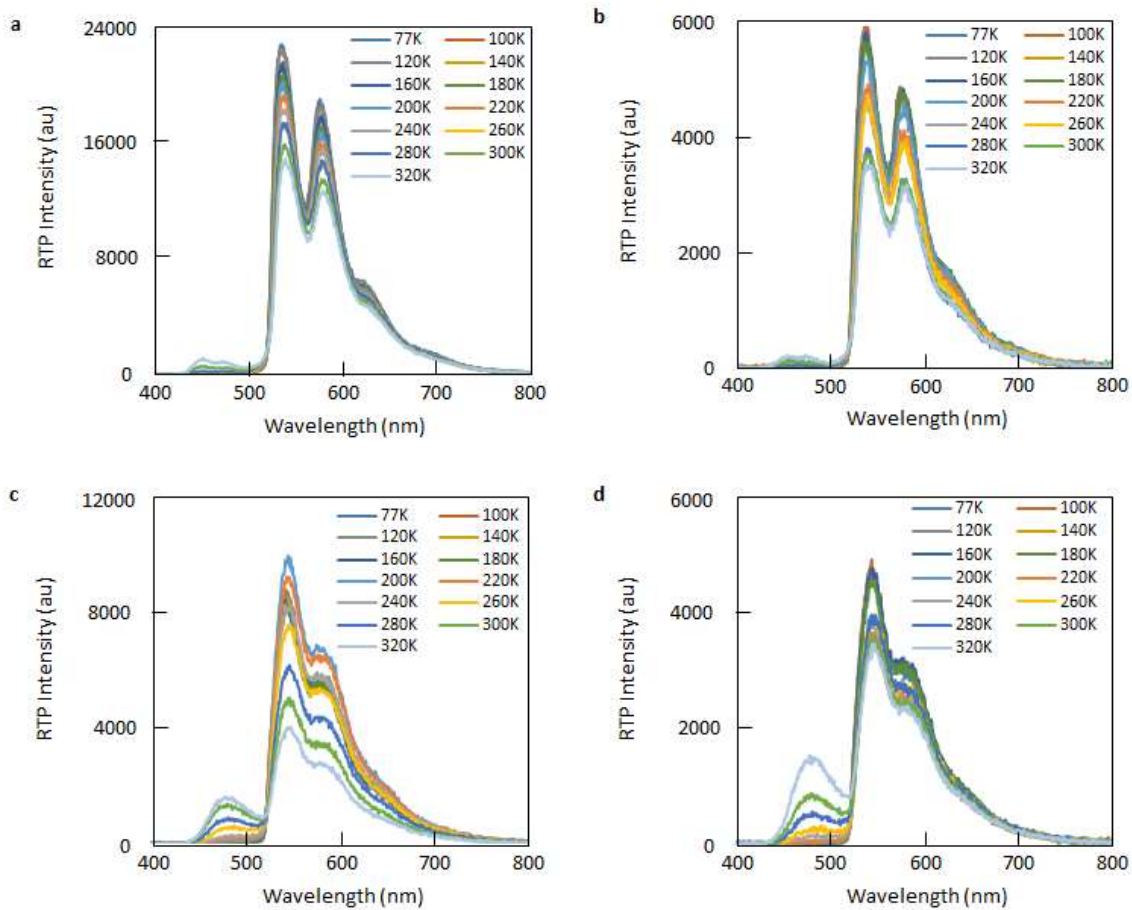

**Figure S19.** Temperature-dependent RTP intensity in 0.3 wt% chromophore doped in amorphous  $\beta$ -estradiol of (a) **2**, (b) **2D**, (c) **3** and (d) **3D**.

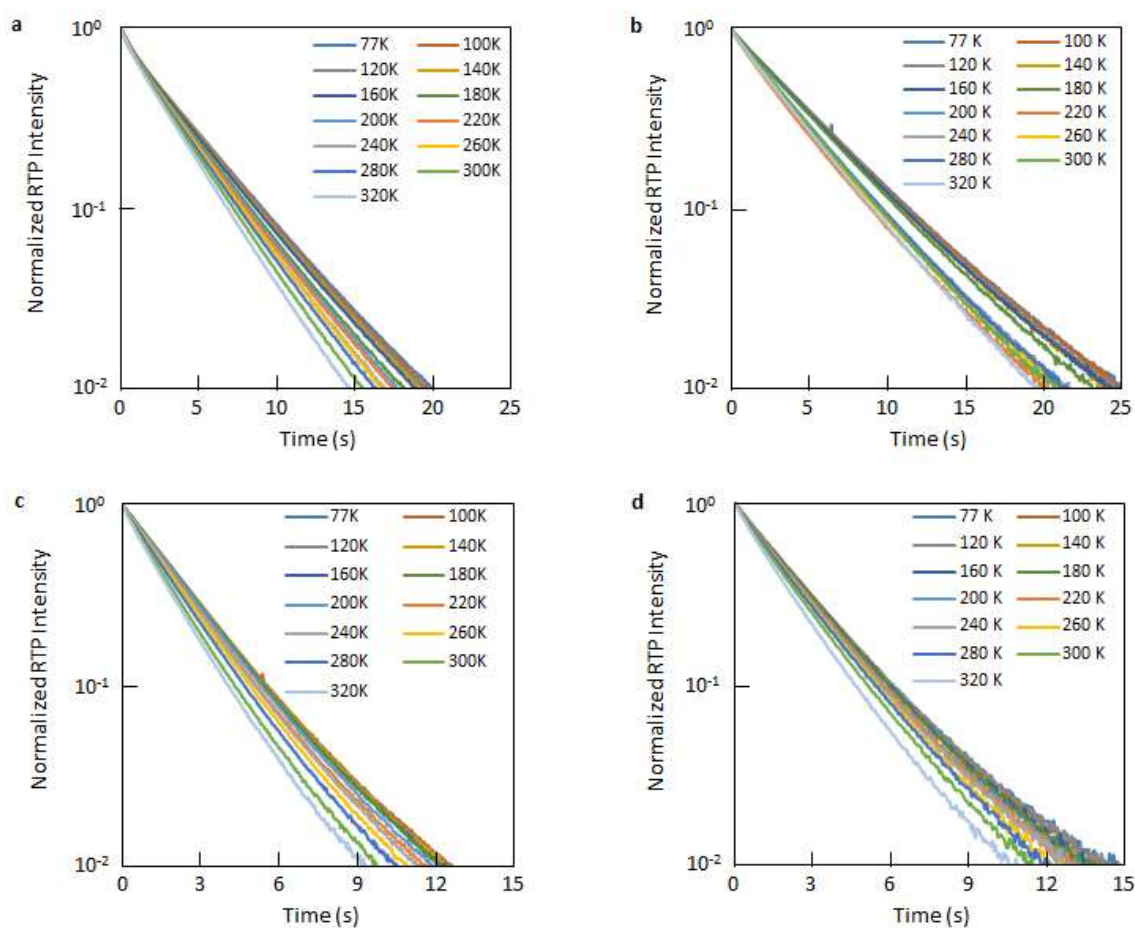

**Figure S20.** Temperature-dependent RTP decay characteristics in 0.3 wt% chromophore doped in amorphous  $\beta$ -estradiol of (a) **2**, (b) **2D**, (c) **3** and (d) **3D**.

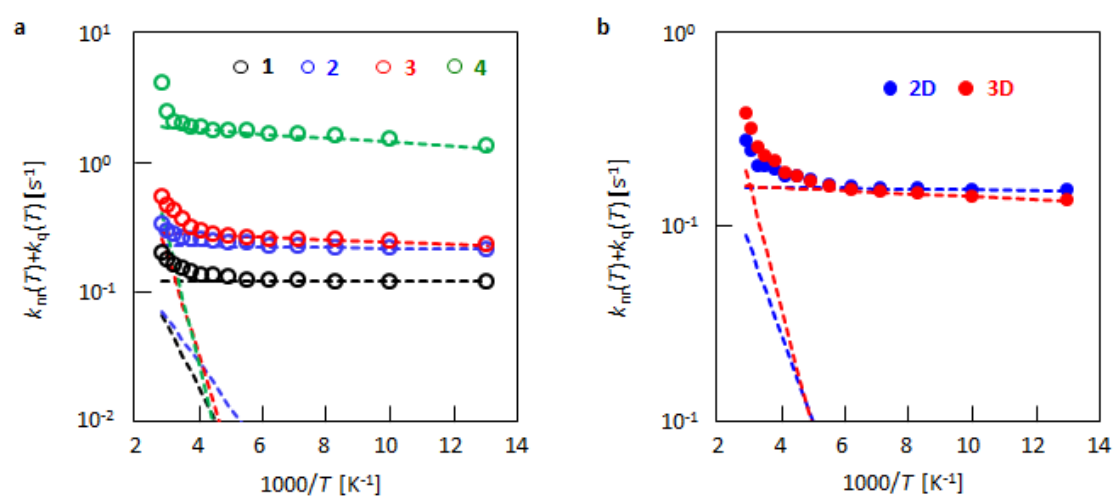

**Figure S21.** Temperature-dependent  $k_{nr}(T) + k_q(T)$  in 0.3 wt% chromophore doped in amorphous  $\beta$ -estradiol of (a) **1–4** and (b) **2D** and **3D**. Red and black dashed line indicates fitting of  $k_{nr}(T)$  and  $k_q(T)$  based on Arrhenius equation, respectively.

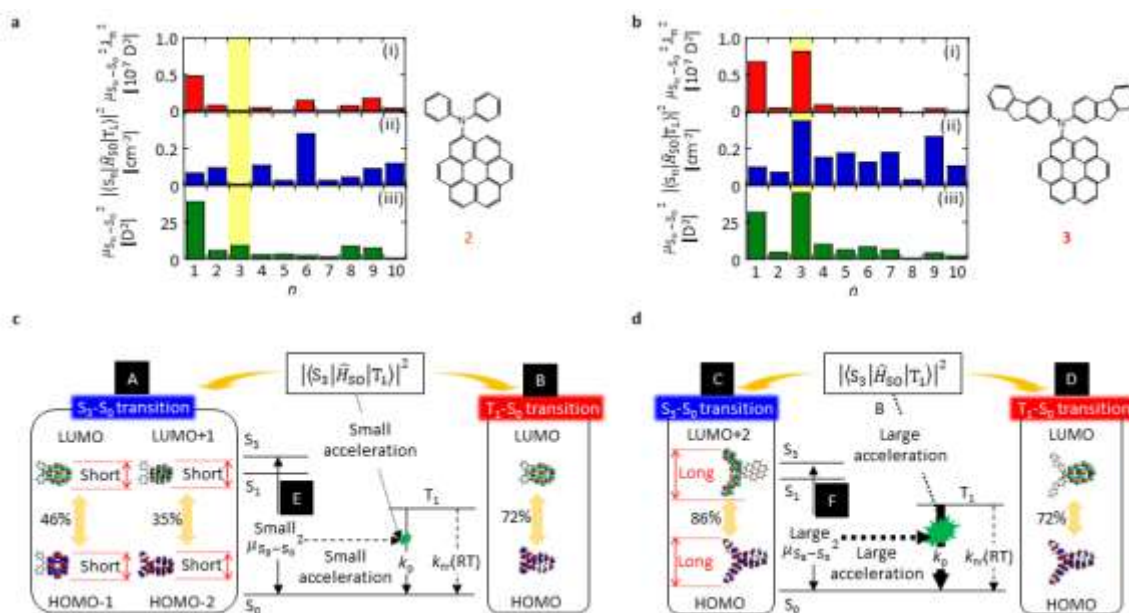

**Figure S22.** Role of RTP antenna in **2** and **3**. (a)  $\mu_{S_n-S_0}^2 \lambda_n^2$  ((i)),  $|\langle S_n | \hat{H}_{SO} | T_1 \rangle|^2$  ((ii)) and  $\mu_{S_n-S_0}^2$  ((iii)) for each  $n$  in **2**. (b)  $\mu_{S_n-S_0}^2 \lambda_n^2$  ((i)),  $|\langle S_n | \hat{H}_{SO} | T_1 \rangle|^2$  ((ii)) and  $\mu_{S_n-S_0}^2$  ((iii)) for each  $n$  in **3**. (c) Molecular orbital related to  $S_3-S_0$  and  $T_1-S_0$  transitions of **2**. (d) Molecular orbital related to  $S_3-S_0$  and  $T_1-S_0$  transitions of **3**. In (c) and (d) iso values of the displayed molecular orbital were set to 0.02.

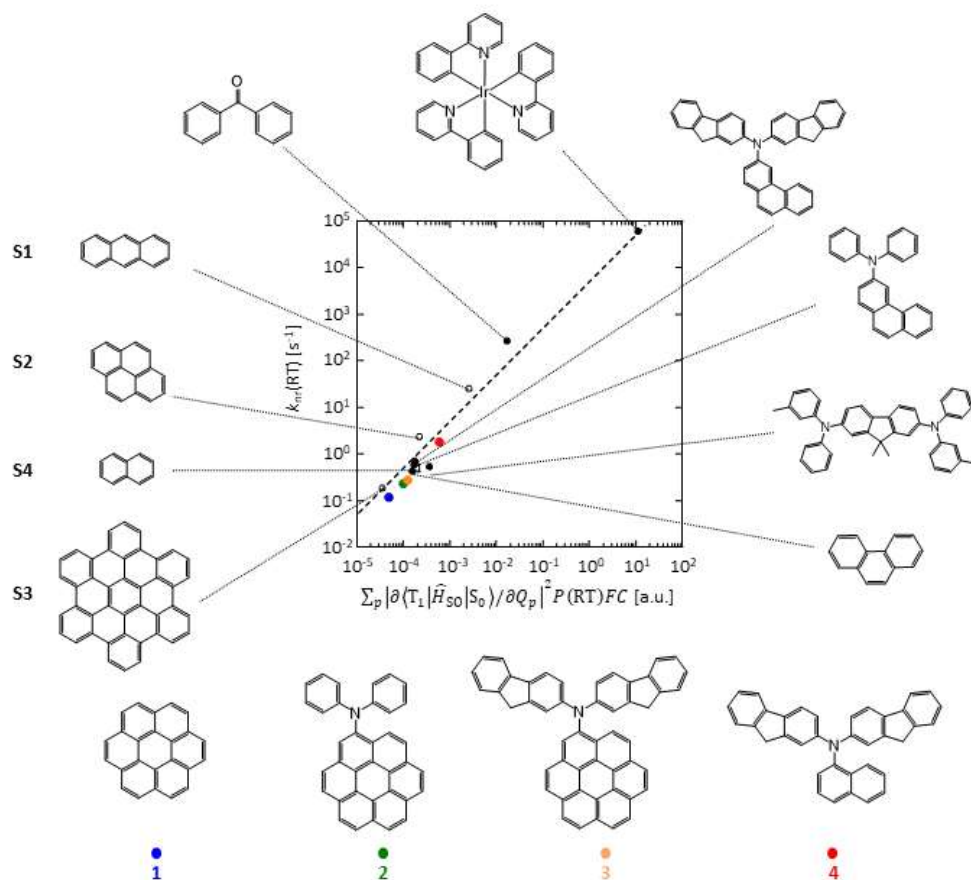

**Figure S23.** Correlation between optically determined  $k_{nr}(RT)$  and  $\sum_p |\partial \langle T_1 | \hat{H}_{SO} | S_0 \rangle / \partial Q_p|^2 P(RT)FC$  for chromophores with a variety of phosphorescence colors. Data of black solid circles.<sup>S9</sup> Black open circles are additional data for chromophores with red RTP characteristics in a  $\beta$ -estradiol matrix.  $k_{nr}(RT)$  of **S1** and **S2** in an amorphous  $\beta$ -estradiol matrix determined from  $k_{nr}(RT) = 1/\tau_p(RT)$  because  $k_p$  could be ignored as  $\Phi_p(RT)$  was small (less than 0.1%).  $k_q(RT)$  could be ignored compared with  $k_{nr}(RT)$  because the temperature dependence of  $k_{nr}(RT) + k_q(RT)$  was linear for an Arrhenius plot between 77 K and RT. For **S3**, the reported optically measured  $k_{nr}(RT)$  of alkyl-substituted hexabenzocoronene in an  $\beta$ -estradiol matrix was used,<sup>S10</sup> because unsubstituted hexabenzocoronene hardly dissolved in  $\beta$ -estradiol.  $\sum_p |\partial \langle T_1 | \hat{H}_{SO} | S_0 \rangle / \partial Q_p|^2 P(RT)FC$  are calculated data using hexabenzocoronene (Table S7). Solid squares are data of molecularly dispersed naphthalene in ZEONEX under vacuum.  $k_{nr}(RT)$  of the molecularly dispersed naphthalene in ZEONEX was determined from data in Figure S24.  $\sum_p |\partial \langle T_1 | \hat{H}_{SO} | S_0 \rangle / \partial Q_p|^2 P(RT)FC$  of **S1**, **S2**, and **S4** is calculated data using Table S4, S5 and S7, respectively.

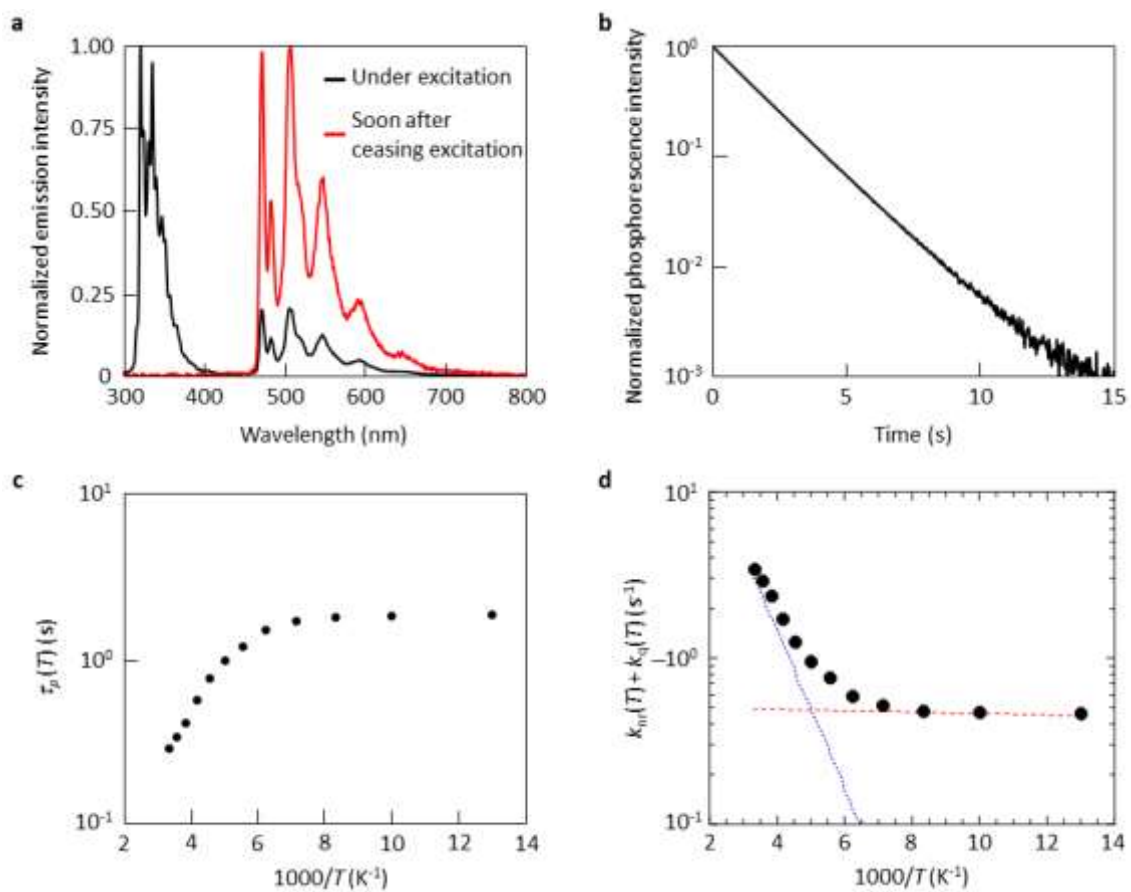

**Figure S24.** Optical characteristics of 0.3 wt% naphthalene-doped ZEONEX. (a) Emission spectra under excitation and soon after ceasing excitation at 77 K. (b) Phosphorescence lifetime at 77 K. (c) Temperature dependence of  $\tau_p(T)$ . (d) Temperature dependence of  $k_{nr}(T) + k_q(T)$ . Excitation is 275 nm.

**Table S2.** Photo-physical parameters ( $\Delta E_{Q_p}$ ,  $P_{Q_p}(\text{RT})$ ,  $E_{T_1-S_0}$ , and  $\langle T_1 | \hat{H}_{S_0} | S_0 \rangle_{Q_p}^2$ ) calculated for geometries allowed by normal-mode vibrations with frequency in  $T_1$  at RT for chromophore **2**.  $\omega_p$  is the wavenumber of the  $p$ th normal vibrational mode in the structure optimized at  $T_1$ .  $Q_p$  is the mass weighted normal coordinates at  $T_1$ . Calculation regarding geometries was stopped when  $\Delta E_{Q_p}$  becomes larger than 0.2 eV because these geometries with  $\Delta E_{Q_p} > 0.2$  eV are hardly allowed below RT.  $E_{T_1-S_0}$  does not largely change for  $Q_p$  with  $P_{Q_p}(\text{RT}) > 0.01$  which corresponds to geometries much allowed at RT.

| $\omega_p$<br>( $\text{cm}^{-1}$ ) | $Q_p$<br>(a.u.) | $\Delta E_{Q_p}$<br>(eV) | $P_{Q_p}(\text{RT})$ | $\langle T_1   \hat{H}_{S_0}   S_0 \rangle_{Q_p}^2$<br>( $\text{cm}^{-2}$ ) | $E_{T_1-S_0}$<br>(eV) |
|------------------------------------|-----------------|--------------------------|----------------------|-----------------------------------------------------------------------------|-----------------------|
| 22.39573                           | -1              | 0.0060                   | 0.7923               | 0.2278                                                                      | 2.11                  |
| 22.39573                           | -0.8            | 0.0034                   | 0.8775               | 0.2340                                                                      | 2.12                  |
| 22.39573                           | -0.6            | 0.0016                   | 0.9381               | 0.2399                                                                      | 2.12                  |
| 22.39573                           | -0.4            | 0.0006                   | 0.9767               | 0.2457                                                                      | 2.12                  |
| 22.39573                           | -0.2            | 0.0001                   | 0.9965               | 0.2509                                                                      | 2.13                  |
| 22.39573                           | 0               | 0.0000                   | 1.0000               | 0.2557                                                                      | 2.13                  |
| 22.39573                           | 0.2             | 0.0003                   | 0.9879               | 0.2602                                                                      | 2.13                  |
| 22.39573                           | 0.4             | 0.0011                   | 0.9593               | 0.2639                                                                      | 2.13                  |
| 22.39573                           | 0.6             | 0.0024                   | 0.9119               | 0.2674                                                                      | 2.13                  |
| 22.39573                           | 0.8             | 0.0044                   | 0.8434               | 0.2702                                                                      | 2.13                  |
| 22.39573                           | 1               | 0.0073                   | 0.7526               | 0.2729                                                                      | 2.13                  |
| 23.22645                           | -1              | 0.0076                   | 0.7430               | 0.2061                                                                      | 2.14                  |
| 23.22645                           | -0.8            | 0.0042                   | 0.8487               | 0.2150                                                                      | 2.13                  |
| 23.22645                           | -0.6            | 0.0020                   | 0.9242               | 0.2238                                                                      | 2.13                  |
| 23.22645                           | -0.4            | 0.0007                   | 0.9717               | 0.2339                                                                      | 2.13                  |
| 23.22645                           | -0.2            | 0.0001                   | 0.9956               | 0.2444                                                                      | 2.13                  |
| 23.22645                           | 0               | 0.0000                   | 1.0000               | 0.2557                                                                      | 2.13                  |
| 23.22645                           | 0.2             | 0.0003                   | 0.9868               | 0.2677                                                                      | 2.13                  |
| 23.22645                           | 0.4             | 0.0012                   | 0.9552               | 0.2807                                                                      | 2.13                  |
| 23.22645                           | 0.6             | 0.0026                   | 0.9022               | 0.2939                                                                      | 2.12                  |
| 23.22645                           | 0.8             | 0.0050                   | 0.8240               | 0.3075                                                                      | 2.12                  |
| 23.22645                           | 1               | 0.0085                   | 0.7186               | 0.3221                                                                      | 2.12                  |



|          |      |        |        |        |      |
|----------|------|--------|--------|--------|------|
| 42.48147 | -1   | 0.0378 | 0.2298 | 0.2774 | 2.13 |
| 42.48147 | -0.8 | 0.0186 | 0.4850 | 0.2723 | 2.13 |
| 42.48147 | -0.6 | 0.0080 | 0.7323 | 0.2674 | 2.13 |
| 42.48147 | -0.4 | 0.0028 | 0.8971 | 0.2630 | 2.13 |
| 42.48147 | -0.2 | 0.0006 | 0.9773 | 0.2592 | 2.13 |
| 42.48147 | 0    | 0.0000 | 1.0000 | 0.2557 | 2.13 |
| 42.48147 | 0.2  | 0.0006 | 0.9762 | 0.2526 | 2.13 |
| 42.48147 | 0.4  | 0.0030 | 0.8884 | 0.2503 | 2.13 |
| 42.48147 | 0.6  | 0.0088 | 0.7094 | 0.2484 | 2.13 |
| 42.48147 | 0.8  | 0.0204 | 0.4517 | 0.2470 | 2.12 |
| 42.48147 | 1    | 0.0411 | 0.2017 | 0.2458 | 2.12 |
| 52.1149  | -1   | 0.0434 | 0.1844 | 0.2629 | 2.13 |
| 52.1149  | -0.8 | 0.0236 | 0.3998 | 0.2623 | 2.13 |
| 52.1149  | -0.6 | 0.0114 | 0.6427 | 0.2610 | 2.13 |
| 52.1149  | -0.4 | 0.0044 | 0.8415 | 0.2599 | 2.13 |
| 52.1149  | -0.2 | 0.0010 | 0.9611 | 0.2581 | 2.13 |
| 52.1149  | 0    | 0.0000 | 1.0000 | 0.2557 | 2.13 |
| 52.1149  | 0.2  | 0.0010 | 0.9636 | 0.2530 | 2.13 |
| 52.1149  | 0.4  | 0.0042 | 0.8489 | 0.2500 | 2.13 |
| 52.1149  | 0.6  | 0.0109 | 0.6549 | 0.2464 | 2.13 |
| 52.1149  | 0.8  | 0.0228 | 0.4115 | 0.2425 | 2.13 |
| 52.1149  | 1    | 0.0426 | 0.1907 | 0.2381 | 2.13 |
| 64.64087 | -1   | 0.0511 | 0.1370 | 0.2337 | 2.11 |
| 64.64087 | -0.8 | 0.0294 | 0.3184 | 0.2388 | 2.12 |
| 64.64087 | -0.6 | 0.0150 | 0.5570 | 0.2437 | 2.12 |
| 64.64087 | -0.4 | 0.0061 | 0.7875 | 0.2482 | 2.12 |
| 64.64087 | -0.2 | 0.0014 | 0.9469 | 0.2518 | 2.13 |
| 64.64087 | 0    | 0.0000 | 1.0000 | 0.2557 | 2.13 |
| 64.64087 | 0.2  | 0.0016 | 0.9397 | 0.2594 | 2.13 |
| 64.64087 | 0.4  | 0.0063 | 0.7820 | 0.2617 | 2.13 |
| 64.64087 | 0.6  | 0.0148 | 0.5628 | 0.2652 | 2.13 |
| 64.64087 | 0.8  | 0.0280 | 0.3357 | 0.2674 | 2.13 |
| 64.64087 | 1    | 0.0477 | 0.1561 | 0.2696 | 2.14 |
| 75.38879 | -1   | 0.0631 | 0.0858 | 0.2739 | 2.11 |
| 75.38879 | -0.8 | 0.0385 | 0.2234 | 0.2713 | 2.11 |
| 75.38879 | -0.6 | 0.0208 | 0.4457 | 0.2683 | 2.12 |

|          |      |        |        |        |      |
|----------|------|--------|--------|--------|------|
| 75.38879 | -0.4 | 0.0089 | 0.7079 | 0.2648 | 2.12 |
| 75.38879 | -0.2 | 0.0021 | 0.9211 | 0.2610 | 2.13 |
| 75.38879 | 0    | 0.0000 | 1.0000 | 0.2557 | 2.13 |
| 75.38879 | 0.2  | 0.0023 | 0.9135 | 0.2501 | 2.13 |
| 75.38879 | 0.4  | 0.0091 | 0.7007 | 0.2434 | 2.13 |
| 75.38879 | 0.6  | 0.0208 | 0.4456 | 0.2399 | 2.12 |
| 75.38879 | 0.8  | 0.0378 | 0.2296 | 0.2549 | 2.12 |
| 75.38879 | 1    | 0.0611 | 0.0927 | 0.2708 | 2.11 |
| 81.38092 | -1   | 0.0688 | 0.0686 | 0.2660 | 2.12 |
| 81.38092 | -0.8 | 0.0393 | 0.2165 | 0.2633 | 2.12 |
| 81.38092 | -0.6 | 0.0201 | 0.4574 | 0.2606 | 2.12 |
| 81.38092 | -0.4 | 0.0083 | 0.7226 | 0.2585 | 2.13 |
| 81.38092 | -0.2 | 0.0020 | 0.9241 | 0.2567 | 2.13 |
| 81.38092 | 0    | 0.0000 | 1.0000 | 0.2557 | 2.13 |
| 81.38092 | 0.2  | 0.0021 | 0.9223 | 0.2557 | 2.13 |
| 81.38092 | 0.4  | 0.0090 | 0.7042 | 0.2553 | 2.13 |
| 81.38092 | 0.6  | 0.0225 | 0.4160 | 0.2564 | 2.13 |
| 81.38092 | 0.8  | 0.0454 | 0.1709 | 0.2584 | 2.12 |
| 81.38092 | 1    | 0.0813 | 0.0422 | 0.2608 | 2.12 |
| 92.19134 | -1   | 0.0840 | 0.0381 | 0.1605 | 2.14 |
| 92.19134 | -0.8 | 0.0518 | 0.1332 | 0.1745 | 2.14 |
| 92.19134 | -0.6 | 0.0283 | 0.3322 | 0.1910 | 2.14 |
| 92.19134 | -0.4 | 0.0123 | 0.6185 | 0.2098 | 2.13 |
| 92.19134 | -0.2 | 0.0031 | 0.8875 | 0.2317 | 2.13 |
| 92.19134 | 0    | 0.0000 | 1.0000 | 0.2557 | 2.13 |
| 92.19134 | 0.2  | 0.0030 | 0.8888 | 0.2823 | 2.12 |
| 92.19134 | 0.4  | 0.0124 | 0.6172 | 0.3110 | 2.12 |
| 92.19134 | 0.6  | 0.0287 | 0.3267 | 0.3419 | 2.11 |
| 92.19134 | 0.8  | 0.0531 | 0.1266 | 0.3750 | 2.10 |
| 92.19134 | 1    | 0.0869 | 0.0340 | 0.4097 | 2.09 |
| 129.9647 | -1   | 0.1985 | 0.0004 | 0.1975 | 2.10 |
| 129.9647 | -0.8 | 0.1198 | 0.0094 | 0.1998 | 2.11 |
| 129.9647 | -0.6 | 0.0642 | 0.0823 | 0.1997 | 2.12 |
| 129.9647 | -0.4 | 0.0275 | 0.3428 | 0.2058 | 2.13 |
| 129.9647 | -0.2 | 0.0067 | 0.7690 | 0.2305 | 2.13 |
| 129.9647 | 0    | 0.0000 | 1.0000 | 0.2557 | 2.13 |

|          |      |        |        |        |      |
|----------|------|--------|--------|--------|------|
| 129.9647 | 0.2  | 0.0066 | 0.7732 | 0.2811 | 2.12 |
| 129.9647 | 0.4  | 0.0272 | 0.3473 | 0.3064 | 2.11 |
| 129.9647 | 0.6  | 0.0635 | 0.0845 | 0.3310 | 2.10 |
| 129.9647 | 0.8  | 0.1185 | 0.0099 | 0.3555 | 2.09 |
| 129.9647 | 1    | 0.1962 | 0.0005 | 0.3788 | 2.07 |
| 139.7246 | -1   | 0.1964 | 0.0005 | 0.1090 | 2.11 |
| 139.7246 | -0.8 | 0.1185 | 0.0099 | 0.1271 | 2.12 |
| 139.7246 | -0.6 | 0.0634 | 0.0847 | 0.1554 | 2.12 |
| 139.7246 | -0.4 | 0.0271 | 0.3479 | 0.1862 | 2.12 |
| 139.7246 | -0.2 | 0.0066 | 0.7731 | 0.2196 | 2.13 |
| 139.7246 | 0    | 0.0000 | 1.0000 | 0.2557 | 2.13 |
| 139.7246 | 0.2  | 0.0066 | 0.7734 | 0.2937 | 2.13 |
| 139.7246 | 0.4  | 0.0270 | 0.3497 | 0.3331 | 2.13 |
| 139.7246 | 0.6  | 0.0630 | 0.0861 | 0.3732 | 2.12 |
| 139.7246 | 0.8  | 0.1177 | 0.0103 | 0.4143 | 2.12 |
| 139.7246 | 1    | 0.1952 | 0.0005 | 0.4549 | 2.12 |
| 171.4148 | -1   | 0.3045 | 0.0000 | 0.2324 | 2.10 |
| 171.4148 | -0.8 | 0.1913 | 0.0006 | 0.2396 | 2.10 |
| 171.4148 | -0.6 | 0.1061 | 0.0161 | 0.2455 | 2.11 |
| 171.4148 | -0.4 | 0.0468 | 0.1621 | 0.2500 | 2.12 |
| 171.4148 | -0.2 | 0.0117 | 0.6349 | 0.2535 | 2.12 |
| 171.4148 | 0    | 0.0000 | 1.0000 | 0.2557 | 2.13 |
| 171.4148 | 0.2  | 0.0117 | 0.6339 | 0.2564 | 2.13 |
| 171.4148 | 0.4  | 0.0476 | 0.1566 | 0.2561 | 2.13 |
| 171.4148 | 0.6  | 0.1095 | 0.0141 | 0.2543 | 2.14 |
| 171.4148 | 0.8  | 0.1998 | 0.0004 | 0.2507 | 2.14 |
| 171.4148 | 1    | 0.3218 | 0.0000 | 0.2520 | 2.14 |
| 196.8336 | -0.8 | 0.2435 | 0.0001 | 0.7046 | 1.97 |
| 196.8336 | -0.6 | 0.1333 | 0.0056 | 0.5166 | 2.02 |
| 196.8336 | -0.4 | 0.0580 | 0.1045 | 0.3822 | 2.06 |
| 196.8336 | -0.2 | 0.0143 | 0.5732 | 0.3107 | 2.10 |
| 196.8336 | 0    | 0.0000 | 1.0000 | 0.2557 | 2.13 |
| 196.8336 | 0.2  | 0.0144 | 0.5713 | 0.2139 | 2.15 |
| 196.8336 | 0.4  | 0.0582 | 0.1039 | 0.1822 | 2.16 |
| 196.8336 | 0.6  | 0.1336 | 0.0055 | 0.1580 | 2.16 |
| 196.8336 | 0.8  | 0.2444 | 0.0001 | 0.1390 | 2.16 |

|          |      |        |        |        |      |
|----------|------|--------|--------|--------|------|
| 204.8164 | -0.8 | 0.2983 | 0.0000 | 0.1469 | 2.17 |
| 204.8164 | -0.6 | 0.1662 | 0.0015 | 0.1693 | 2.16 |
| 204.8164 | -0.4 | 0.0733 | 0.0576 | 0.1950 | 2.15 |
| 204.8164 | -0.2 | 0.0182 | 0.4924 | 0.2235 | 2.14 |
| 204.8164 | 0    | 0.0000 | 1.0000 | 0.2557 | 2.13 |
| 204.8164 | 0.2  | 0.0185 | 0.4864 | 0.2912 | 2.11 |
| 204.8164 | 0.4  | 0.0742 | 0.0556 | 0.3298 | 2.10 |
| 204.8164 | 0.6  | 0.1683 | 0.0014 | 0.3717 | 2.08 |
| 204.8164 | 0.8  | 0.3025 | 0.0000 | 0.4160 | 2.07 |
| 242.3149 | -0.6 | 0.2061 | 0.0003 | 0.3639 | 2.06 |
| 242.3149 | -0.4 | 0.0891 | 0.0311 | 0.3235 | 2.09 |
| 242.3149 | -0.2 | 0.0219 | 0.4268 | 0.2864 | 2.11 |
| 242.3149 | 0    | 0.0000 | 1.0000 | 0.2557 | 2.13 |
| 242.3149 | 0.2  | 0.0218 | 0.4277 | 0.2319 | 2.14 |
| 242.3149 | 0.4  | 0.0884 | 0.0320 | 0.2160 | 2.14 |
| 242.3149 | 0.6  | 0.2035 | 0.0004 | 0.2086 | 2.13 |
| 250.7109 | -0.6 | 0.2064 | 0.0003 | 0.2637 | 2.12 |
| 250.7109 | -0.4 | 0.0895 | 0.0308 | 0.2623 | 2.12 |
| 250.7109 | -0.2 | 0.0220 | 0.4252 | 0.2597 | 2.12 |
| 250.7109 | 0    | 0.0000 | 1.0000 | 0.2557 | 2.13 |
| 250.7109 | 0.2  | 0.0216 | 0.4312 | 0.2509 | 2.13 |
| 250.7109 | 0.4  | 0.0869 | 0.0339 | 0.0000 | 2.13 |
| 250.7109 | 0.6  | 0.1981 | 0.0004 | 0.2406 | 2.13 |
| 250.7109 | 0.8  | 0.3586 | 0.0000 | 0.2362 | 2.13 |
| 263.3815 | -0.6 | 0.2306 | 0.0001 | 0.3805 | 2.09 |
| 263.3815 | -0.4 | 0.1018 | 0.0190 | 0.3150 | 2.11 |
| 263.3815 | -0.2 | 0.0254 | 0.3727 | 0.2734 | 2.12 |
| 263.3815 | 0    | 0.0000 | 1.0000 | 0.2557 | 2.13 |
| 263.3815 | 0.2  | 0.0252 | 0.3749 | 0.2365 | 2.13 |
| 263.3815 | 0.4  | 0.1012 | 0.0195 | 0.2152 | 2.13 |
| 263.3815 | 0.6  | 0.2291 | 0.0001 | 0.1928 | 2.12 |
| 283.224  | -0.6 | 0.2609 | 0.0000 | 0.2915 | 2.09 |
| 283.224  | -0.4 | 0.1127 | 0.0124 | 0.2815 | 2.11 |
| 283.224  | -0.2 | 0.0277 | 0.3406 | 0.2691 | 2.13 |
| 283.224  | 0    | 0.0000 | 1.0000 | 0.2557 | 2.13 |
| 283.224  | 0.2  | 0.0280 | 0.3367 | 0.2412 | 2.12 |

|          |      |        |        |        |      |
|----------|------|--------|--------|--------|------|
| 283.224  | 0.4  | 0.1139 | 0.0119 | 0.2256 | 2.10 |
| 283.224  | 0.6  | 0.2643 | 0.0000 | 0.2097 | 2.08 |
| 288.3902 | -0.6 | 0.2696 | 0.0000 | 0.0318 | 2.09 |
| 288.3902 | -0.4 | 0.1168 | 0.0106 | 0.0745 | 2.12 |
| 288.3902 | -0.2 | 0.0287 | 0.3275 | 0.1484 | 2.13 |
| 288.3902 | 0    | 0.0000 | 1.0000 | 0.2557 | 2.13 |
| 288.3902 | 0.2  | 0.0284 | 0.3313 | 0.3960 | 2.11 |
| 288.3902 | 0.4  | 0.1147 | 0.0115 | 0.5649 | 2.08 |
| 288.3902 | 0.6  | 0.2630 | 0.0000 | 0.7540 | 2.04 |
| 305.8392 | -0.6 | 0.2950 | 0.0000 | 0.5662 | 2.05 |
| 305.8392 | -0.4 | 0.1290 | 0.0066 | 0.4123 | 2.08 |
| 305.8392 | -0.2 | 0.0319 | 0.2890 | 0.3091 | 2.11 |
| 305.8392 | 0    | 0.0000 | 1.0000 | 0.2557 | 2.13 |
| 305.8392 | 0.2  | 0.0320 | 0.2875 | 0.2047 | 2.14 |
| 305.8392 | 0.4  | 0.1291 | 0.0066 | 0.1582 | 2.15 |
| 305.8392 | 0.6  | 0.2952 | 0.0000 | 0.1180 | 2.14 |
| 316.0882 | -0.6 | 0.4726 | 0.0000 | 0.8444 | 1.85 |
| 316.0882 | -0.4 | 0.1987 | 0.0004 | 0.5863 | 1.99 |
| 316.0882 | -0.2 | 0.0470 | 0.1606 | 0.3681 | 2.08 |
| 316.0882 | 0    | 0.0000 | 1.0000 | 0.2557 | 2.13 |
| 316.0882 | 0.2  | 0.0443 | 0.1782 | 0.1643 | 2.11 |
| 316.0882 | 0.4  | 0.1833 | 0.0008 | 0.1019 | 2.04 |
| 316.0882 | 0.6  | 0.4340 | 0.0000 | 0.0624 | 1.93 |
| 320.6745 | -0.6 | 0.3376 | 0.0000 | 0.1716 | 2.13 |
| 320.6745 | -0.4 | 0.1512 | 0.0028 | 0.2009 | 2.13 |
| 320.6745 | -0.2 | 0.0381 | 0.2271 | 0.2291 | 2.13 |
| 320.6745 | 0    | 0.0000 | 1.0000 | 0.2557 | 2.13 |
| 320.6745 | 0.2  | 0.0393 | 0.2165 | 0.2792 | 2.12 |
| 320.6745 | 0.4  | 0.1592 | 0.0020 | 0.2977 | 2.12 |
| 320.6745 | 0.6  | 0.3635 | 0.0000 | 0.3099 | 2.11 |
| 346.1167 | -0.4 | 0.2099 | 0.0003 | 0.3862 | 2.03 |
| 346.1167 | -0.2 | 0.0519 | 0.1327 | 0.2924 | 2.09 |
| 346.1167 | 0    | 0.0000 | 1.0000 | 0.2557 | 2.13 |
| 346.1167 | 0.2  | 0.0513 | 0.1356 | 0.2380 | 2.14 |
| 346.1167 | 0.4  | 0.2058 | 0.0003 | 0.1977 | 2.13 |
| 374.0578 | -0.4 | 0.2478 | 0.0001 | 0.1836 | 2.22 |

|          |      |        |        |        |      |
|----------|------|--------|--------|--------|------|
| 374.0578 | -0.2 | 0.0616 | 0.0908 | 0.2201 | 2.18 |
| 374.0578 | 0    | 0.0000 | 1.0000 | 0.2557 | 2.13 |
| 374.0578 | 0.2  | 0.0614 | 0.0918 | 0.2884 | 2.07 |
| 374.0578 | 0.4  | 0.2447 | 0.0001 | 0.3169 | 2.01 |
| 391.9648 | -0.4 | 0.3121 | 0.0000 | 0.1644 | 2.04 |
| 391.9648 | -0.2 | 0.0786 | 0.0470 | 0.2065 | 2.09 |
| 391.9648 | 0    | 0.0000 | 1.0000 | 0.2557 | 2.13 |
| 391.9648 | 0.2  | 0.0793 | 0.0456 | 0.3118 | 2.16 |
| 391.9648 | 0.4  | 0.3201 | 0.0000 | 0.3735 | 2.19 |
| 403.1072 | -0.4 | 0.2661 | 0.0000 | 0.3039 | 2.18 |
| 403.1072 | -0.2 | 0.0665 | 0.0751 | 0.2815 | 2.16 |
| 403.1072 | 0    | 0.0000 | 1.0000 | 0.2557 | 2.13 |
| 403.1072 | 0.2  | 0.0667 | 0.0747 | 0.2280 | 2.10 |
| 403.1072 | 0.4  | 0.2672 | 0.0000 | 0.1992 | 2.06 |
| 420.748  | -0.6 | 0.3754 | 0.0000 | 0.2734 | 2.12 |
| 420.748  | -0.4 | 0.1632 | 0.0017 | 0.2650 | 2.13 |
| 420.748  | -0.2 | 0.0402 | 0.2088 | 0.2592 | 2.13 |
| 420.748  | 0    | 0.0000 | 1.0000 | 0.2557 | 2.13 |
| 420.748  | 0.2  | 0.0401 | 0.2098 | 0.2542 | 2.13 |
| 420.748  | 0.4  | 0.1627 | 0.0018 | 0.2544 | 2.13 |
| 420.748  | 0.6  | 0.3739 | 0.0000 | 0.2574 | 2.13 |
| 425.6565 | -0.6 | 0.3869 | 0.0000 | 0.2220 | 2.14 |
| 425.6565 | -0.4 | 0.1684 | 0.0014 | 0.2306 | 2.14 |
| 425.6565 | -0.2 | 0.0416 | 0.1983 | 0.2420 | 2.13 |
| 425.6565 | 0    | 0.0000 | 1.0000 | 0.2557 | 2.13 |
| 425.6565 | 0.2  | 0.0416 | 0.1984 | 0.2723 | 2.12 |
| 425.6565 | 0.4  | 0.1685 | 0.0014 | 0.2921 | 2.12 |
| 425.6565 | 0.6  | 0.3873 | 0.0000 | 0.3159 | 2.11 |
| 440.068  | -0.4 | 0.2958 | 0.0000 | 0.1909 | 2.09 |
| 440.068  | -0.2 | 0.0740 | 0.0561 | 0.2230 | 2.11 |
| 440.068  | 0    | 0.0000 | 1.0000 | 0.2557 | 2.13 |
| 440.068  | 0.2  | 0.0744 | 0.0552 | 0.2874 | 2.13 |
| 440.068  | 0.4  | 0.2989 | 0.0000 | 0.3149 | 2.13 |
| 444.6616 | -0.4 | 0.2437 | 0.0001 | 0.3844 | 2.07 |
| 444.6616 | -0.2 | 0.0604 | 0.0954 | 0.3195 | 2.10 |
| 444.6616 | 0    | 0.0000 | 1.0000 | 0.2557 | 2.13 |

|          |      |        |        |        |      |
|----------|------|--------|--------|--------|------|
| 444.6616 | 0.2  | 0.0601 | 0.0963 | 0.1949 | 2.14 |
| 444.6616 | 0.4  | 0.2416 | 0.0001 | 0.1387 | 2.15 |
| 463.6607 | -0.4 | 0.3022 | 0.0000 | 0.3177 | 2.05 |
| 463.6607 | -0.2 | 0.0749 | 0.0542 | 0.2836 | 2.10 |
| 463.6607 | 0    | 0.0000 | 1.0000 | 0.2557 | 2.13 |
| 463.6607 | 0.2  | 0.0743 | 0.0555 | 0.2298 | 2.15 |
| 463.6607 | 0.4  | 0.2973 | 0.0000 | 0.2051 | 2.15 |
| 475.2207 | -0.4 | 0.4463 | 0.0000 | 0.2043 | 2.06 |
| 475.2207 | -0.2 | 0.1123 | 0.0126 | 0.2296 | 2.10 |
| 475.2207 | 0    | 0.0000 | 1.0000 | 0.2557 | 2.13 |
| 475.2207 | 0.2  | 0.1136 | 0.0120 | 0.2819 | 2.15 |
| 475.2207 | 0.4  | 0.4579 | 0.0000 | 0.3089 | 2.16 |
| 486.7418 | -0.4 | 0.3402 | 0.0000 | 0.1406 | 2.19 |
| 486.7418 | -0.2 | 0.0850 | 0.0366 | 0.1966 | 2.16 |
| 486.7418 | 0    | 0.0000 | 1.0000 | 0.2557 | 2.13 |
| 486.7418 | 0.2  | 0.0852 | 0.0363 | 0.3143 | 2.08 |
| 486.7418 | 0.4  | 0.3412 | 0.0000 | 0.3690 | 2.03 |
| 488.6372 | -0.4 | 0.3251 | 0.0000 | 0.2939 | 2.14 |
| 488.6372 | -0.2 | 0.0806 | 0.0434 | 0.2746 | 2.14 |
| 488.6372 | 0    | 0.0000 | 1.0000 | 0.2557 | 2.13 |
| 488.6372 | 0.2  | 0.0800 | 0.0445 | 0.2363 | 2.11 |
| 488.6372 | 0.4  | 0.3187 | 0.0000 | 0.2159 | 2.09 |
| 508.8203 | -0.4 | 0.3342 | 0.0000 | 0.1241 | 2.04 |
| 508.8203 | -0.2 | 0.0830 | 0.0396 | 0.1654 | 2.10 |
| 508.8203 | 0    | 0.0000 | 1.0000 | 0.2557 | 2.13 |
| 508.8203 | 0.2  | 0.0821 | 0.0410 | 0.3657 | 2.13 |
| 508.8203 | 0.4  | 0.3287 | 0.0000 | 0.5013 | 2.10 |
| 517.2451 | -0.4 | 0.3408 | 0.0000 | 0.2384 | 2.17 |
| 517.2451 | -0.2 | 0.0849 | 0.0367 | 0.2488 | 2.15 |
| 517.2451 | 0    | 0.0000 | 1.0000 | 0.2557 | 2.13 |
| 517.2451 | 0.2  | 0.0849 | 0.0367 | 0.2603 | 2.09 |
| 517.2451 | 0.4  | 0.3414 | 0.0000 | 0.2633 | 2.05 |
| 529.4512 | -0.4 | 0.3642 | 0.0000 | 0.2173 | 2.14 |
| 529.4512 | -0.2 | 0.0903 | 0.0298 | 0.2303 | 2.13 |
| 529.4512 | 0    | 0.0000 | 1.0000 | 0.2557 | 2.13 |
| 529.4512 | 0.2  | 0.0901 | 0.0300 | 0.2804 | 2.12 |

|          |      |        |        |        |      |
|----------|------|--------|--------|--------|------|
| 529.4512 | 0.4  | 0.3617 | 0.0000 | 0.3024 | 2.10 |
| 534.9099 | -0.4 | 0.3729 | 0.0000 | 0.3388 | 2.11 |
| 534.9099 | -0.2 | 0.0928 | 0.0270 | 0.2950 | 2.12 |
| 534.9099 | 0    | 0.0000 | 1.0000 | 0.2557 | 2.13 |
| 534.9099 | 0.2  | 0.0926 | 0.0272 | 0.2206 | 2.12 |
| 534.9099 | 0.4  | 0.3715 | 0.0000 | 0.1891 | 2.10 |
| 542.2004 | -0.4 | 0.3849 | 0.0000 | 0.1353 | 2.12 |
| 542.2004 | -0.2 | 0.0956 | 0.0243 | 0.1910 | 2.13 |
| 542.2004 | 0    | 0.0000 | 1.0000 | 0.2557 | 2.13 |
| 542.2004 | 0.2  | 0.0952 | 0.0246 | 0.3251 | 2.12 |
| 542.2004 | 0.4  | 0.3835 | 0.0000 | 0.4023 | 2.11 |
| 547.2982 | -0.4 | 0.3717 | 0.0000 | 0.1882 | 2.11 |
| 547.2982 | -0.2 | 0.0926 | 0.0272 | 0.2133 | 2.12 |
| 547.2982 | 0    | 0.0000 | 1.0000 | 0.2557 | 2.13 |
| 547.2982 | 0.2  | 0.0924 | 0.0275 | 0.3154 | 2.12 |
| 547.2982 | 0.4  | 0.3718 | 0.0000 | 0.3911 | 2.11 |
| 572.1508 | -0.4 | 0.4218 | 0.0000 | 0.4118 | 2.06 |
| 572.1508 | -0.2 | 0.1046 | 0.0171 | 0.2875 | 2.10 |
| 572.1508 | 0    | 0.0000 | 1.0000 | 0.2557 | 2.13 |
| 572.1508 | 0.2  | 0.1042 | 0.0173 | 0.2424 | 2.14 |
| 572.1508 | 0.4  | 0.4190 | 0.0000 | 0.2287 | 2.13 |
| 591.0848 | -0.4 | 0.6224 | 0.0000 | 0.4472 | 2.08 |
| 591.0848 | -0.2 | 0.1553 | 0.0024 | 0.3006 | 2.11 |
| 591.0848 | 0    | 0.0000 | 1.0000 | 0.2557 | 2.13 |
| 591.0848 | 0.2  | 0.1555 | 0.0024 | 0.2220 | 2.13 |
| 591.0848 | 0.4  | 0.6235 | 0.0000 | 0.1899 | 2.11 |
| 619.4819 | -0.4 | 0.6691 | 0.0000 | 0.1852 | 2.09 |
| 619.4819 | -0.2 | 0.1630 | 0.0018 | 0.2149 | 2.12 |
| 619.4819 | 0    | 0.0000 | 1.0000 | 0.2557 | 2.13 |
| 619.4819 | 0.2  | 0.1627 | 0.0018 | 0.3014 | 2.13 |
| 619.4819 | 0.4  | 0.6661 | 0.0000 | 0.3558 | 2.11 |
| 629.0966 | -0.4 | 0.7285 | 0.0000 | 0.2017 | 2.13 |
| 629.0966 | -0.2 | 0.1810 | 0.0009 | 0.2281 | 2.13 |
| 629.0966 | 0    | 0.0000 | 1.0000 | 0.2557 | 2.13 |
| 629.0966 | 0.2  | 0.1809 | 0.0009 | 0.2848 | 2.12 |
| 629.0966 | 0.4  | 0.7263 | 0.0000 | 0.3152 | 2.12 |



|          |      |        |        |        |      |
|----------|------|--------|--------|--------|------|
| 631.5182 | -0.4 | 0.7459 | 0.0000 | 0.2883 | 2.12 |
| 631.5182 | -0.2 | 0.1857 | 0.0007 | 0.2731 | 2.12 |
| 631.5182 | 0    | 0.0000 | 1.0000 | 0.2557 | 2.13 |
| 631.5182 | 0.2  | 0.1855 | 0.0007 | 0.2376 | 2.13 |
| 631.5182 | 0.4  | 0.7460 | 0.0000 | 0.2192 | 2.13 |
| 636.4164 | -0.4 | 0.7603 | 0.0000 | 0.1712 | 2.13 |
| 636.4164 | -0.2 | 0.1893 | 0.0006 | 0.2017 | 2.14 |
| 636.4164 | 0    | 0.0000 | 1.0000 | 0.2557 | 2.13 |
| 636.4164 | 0.2  | 0.1898 | 0.0006 | 0.3380 | 2.10 |
| 636.4164 | 0.4  | 0.7649 | 0.0000 | 0.4543 | 2.04 |
| 637.4615 | -0.2 | 0.2266 | 0.0001 | 0.2345 | 2.15 |
| 637.4615 | 0    | 0.0000 | 1.0000 | 0.2557 | 2.13 |
| 637.4615 | 0.2  | 0.2268 | 0.0001 | 0.2783 | 2.10 |
| 648.4423 | -0.4 | 0.5437 | 0.0000 | 0.1541 | 2.09 |
| 648.4423 | -0.2 | 0.1347 | 0.0053 | 0.1946 | 2.12 |
| 648.4423 | 0    | 0.0000 | 1.0000 | 0.2557 | 2.13 |
| 648.4423 | 0.2  | 0.1344 | 0.0053 | 0.3385 | 2.11 |
| 648.4423 | 0.4  | 0.5433 | 0.0000 | 0.4475 | 2.07 |
| 669.6632 | -0.2 | 0.2017 | 0.0004 | 0.2181 | 2.14 |
| 669.6632 | 0    | 0.0000 | 1.0000 | 0.2557 | 2.13 |
| 669.6632 | 0.2  | 0.2006 | 0.0004 | 0.3006 | 2.11 |
| 672.7602 | -0.4 | 0.5357 | 0.0000 | 0.5017 | 2.07 |
| 672.7602 | -0.2 | 0.1328 | 0.0057 | 0.3530 | 2.11 |
| 672.7602 | 0    | 0.0000 | 1.0000 | 0.2557 | 2.13 |
| 672.7602 | 0.2  | 0.1334 | 0.0056 | 0.1833 | 2.13 |
| 672.7602 | 0.4  | 0.5390 | 0.0000 | 0.1313 | 2.11 |
| 682.9728 | -0.2 | 0.2189 | 0.0002 | 0.2081 | 2.12 |
| 682.9728 | 0    | 0.0000 | 1.0000 | 0.2557 | 2.13 |
| 682.9728 | 0.2  | 0.2160 | 0.0002 | 0.3096 | 2.13 |
| 692.9592 | -0.4 | 0.6775 | 0.0000 | 0.4770 | 2.07 |
| 692.9592 | -0.2 | 0.1695 | 0.0014 | 0.3521 | 2.10 |
| 692.9592 | 0    | 0.0000 | 1.0000 | 0.2557 | 2.13 |
| 692.9592 | 0.2  | 0.1704 | 0.0013 | 0.1815 | 2.15 |
| 692.9592 | 0.4  | 0.6836 | 0.0000 | 0.1258 | 2.17 |
| 706.2962 | -0.4 | 0.3186 | 0.0000 | 0.2248 | 2.14 |
| 706.2962 | -0.2 | 0.0787 | 0.0467 | 0.2277 | 2.13 |

|          |      |        |        |        |      |
|----------|------|--------|--------|--------|------|
| 706.2962 | 0    | 0.0000 | 1.0000 | 0.2557 | 2.13 |
| 706.2962 | 0.2  | 0.0787 | 0.0467 | 0.2881 | 2.12 |
| 706.2962 | 0.4  | 0.3185 | 0.0000 | 0.3258 | 2.11 |
| 709.7009 | -0.4 | 0.3031 | 0.0000 | 0.2524 | 2.13 |
| 709.7009 | -0.2 | 0.0749 | 0.0543 | 0.2524 | 2.13 |
| 709.7009 | 0    | 0.0000 | 1.0000 | 0.2557 | 2.13 |
| 709.7009 | 0.2  | 0.0747 | 0.0546 | 0.2630 | 2.13 |
| 709.7009 | 0.4  | 0.3031 | 0.0000 | 0.2755 | 2.12 |
| 730.9989 | -0.2 | 0.2378 | 0.0001 | 0.2488 | 2.10 |
| 730.9989 | 0    | 0.0000 | 1.0000 | 0.2557 | 2.13 |
| 730.9989 | 0.2  | 0.2403 | 0.0001 | 0.2547 | 2.15 |
| 744.9636 | -0.4 | 0.7484 | 0.0000 | 0.3276 | 2.08 |
| 744.9636 | -0.2 | 0.1798 | 0.0009 | 0.2791 | 2.12 |
| 744.9636 | 0    | 0.0000 | 1.0000 | 0.2557 | 2.13 |
| 744.9636 | 0.2  | 0.1806 | 0.0009 | 0.2554 | 2.12 |
| 744.9636 | 0.4  | 0.7512 | 0.0000 | 0.2821 | 2.10 |
| 761.3388 | -0.4 | 0.5487 | 0.0000 | 0.4815 | 2.10 |
| 761.3388 | -0.2 | 0.1329 | 0.0057 | 0.3640 | 2.12 |
| 761.3388 | 0    | 0.0000 | 1.0000 | 0.2557 | 2.13 |
| 761.3388 | 0.2  | 0.1328 | 0.0057 | 0.1951 | 2.12 |
| 761.3388 | 0.4  | 0.5488 | 0.0000 | 0.1972 | 2.09 |
| 764.7436 | -0.4 | 0.2888 | 0.0000 | 0.3031 | 2.11 |
| 764.7436 | -0.2 | 0.0684 | 0.0697 | 0.2469 | 2.12 |
| 764.7436 | 0    | 0.0000 | 1.0000 | 0.2557 | 2.13 |
| 764.7436 | 0.2  | 0.0685 | 0.0696 | 0.2862 | 2.12 |
| 764.7436 | 0.4  | 0.2893 | 0.0000 | 0.3186 | 2.11 |
| 767.7311 | -0.4 | 0.3789 | 0.0000 | 0.2606 | 2.12 |
| 767.7311 | -0.2 | 0.0925 | 0.0274 | 0.2598 | 2.13 |
| 767.7311 | 0    | 0.0000 | 1.0000 | 0.2557 | 2.13 |
| 767.7311 | 0.2  | 0.0923 | 0.0275 | 0.2482 | 2.12 |
| 767.7311 | 0.4  | 0.3776 | 0.0000 | 0.2375 | 2.11 |
| 771.3582 | -0.4 | 0.3174 | 0.0000 | 0.2253 | 2.13 |
| 771.3582 | -0.2 | 0.0764 | 0.0510 | 0.2409 | 2.13 |
| 771.3582 | 0    | 0.0000 | 1.0000 | 0.2557 | 2.13 |
| 771.3582 | 0.2  | 0.0763 | 0.0513 | 0.2694 | 2.13 |
| 771.3582 | 0.4  | 0.3170 | 0.0000 | 0.2816 | 2.13 |

|          |      |        |        |        |      |
|----------|------|--------|--------|--------|------|
| 777.5385 | -0.2 | 0.2088 | 0.0003 | 0.2160 | 2.15 |
| 777.5385 | 0    | 0.0000 | 1.0000 | 0.2557 | 2.13 |
| 777.5385 | 0.2  | 0.2089 | 0.0003 | 0.2862 | 2.10 |
| 778.1848 | -0.4 | 0.4853 | 0.0000 | 0.3409 | 2.10 |
| 778.1848 | -0.2 | 0.1164 | 0.0108 | 0.2975 | 2.12 |
| 778.1848 | 0    | 0.0000 | 1.0000 | 0.2557 | 2.13 |
| 778.1848 | 0.2  | 0.1162 | 0.0108 | 0.2169 | 2.13 |
| 778.1848 | 0.4  | 0.4823 | 0.0000 | 0.1832 | 2.11 |
| 789.6987 | -0.2 | 0.2769 | 0.0000 | 0.2042 | 2.08 |
| 789.6987 | 0    | 0.0000 | 1.0000 | 0.2557 | 2.13 |
| 789.6987 | 0.2  | 0.2771 | 0.0000 | 0.2892 | 2.13 |
| 791.5943 | -0.4 | 0.6189 | 0.0000 | 0.1912 | 2.13 |
| 791.5943 | -0.2 | 0.1523 | 0.0027 | 0.1920 | 2.14 |
| 791.5943 | 0    | 0.0000 | 1.0000 | 0.2557 | 2.13 |
| 791.5943 | 0.2  | 0.1519 | 0.0027 | 0.3513 | 2.10 |
| 791.5943 | 0.4  | 0.6147 | 0.0000 | 0.4737 | 2.06 |
| 794.4002 | -0.4 | 0.4844 | 0.0000 | 0.4862 | 2.11 |
| 794.4002 | -0.2 | 0.1170 | 0.0105 | 0.3603 | 2.13 |
| 794.4002 | 0    | 0.0000 | 1.0000 | 0.2557 | 2.13 |
| 794.4002 | 0.2  | 0.1171 | 0.0105 | 0.2077 | 2.11 |
| 794.4002 | 0.4  | 0.4843 | 0.0000 | 0.2354 | 2.08 |
| 805.3342 | -0.4 | 0.3671 | 0.0000 | 0.3763 | 2.10 |
| 805.3342 | -0.2 | 0.0882 | 0.0322 | 0.2993 | 2.12 |
| 805.3342 | 0    | 0.0000 | 1.0000 | 0.2557 | 2.13 |
| 805.3342 | 0.2  | 0.0879 | 0.0327 | 0.2428 | 2.12 |
| 805.3342 | 0.4  | 0.3650 | 0.0000 | 0.2706 | 2.10 |
| 824.7721 | -0.4 | 0.3364 | 0.0000 | 0.1918 | 2.11 |
| 824.7721 | -0.2 | 0.0802 | 0.0440 | 0.2220 | 2.13 |
| 824.7721 | 0    | 0.0000 | 1.0000 | 0.2557 | 2.13 |
| 824.7721 | 0.2  | 0.0804 | 0.0437 | 0.2906 | 2.12 |
| 824.7721 | 0.4  | 0.3366 | 0.0000 | 0.3236 | 2.09 |
| 828.244  | -0.2 | 0.2850 | 0.0000 | 0.2764 | 2.11 |
| 828.244  | 0    | 0.0000 | 1.0000 | 0.2557 | 2.13 |
| 828.244  | 0.2  | 0.2834 | 0.0000 | 0.2280 | 2.13 |
| 837.7315 | -0.4 | 0.3967 | 0.0000 | 0.1573 | 2.07 |
| 837.7315 | -0.2 | 0.0915 | 0.0284 | 0.1648 | 2.11 |

|          |      |        |        |        |      |
|----------|------|--------|--------|--------|------|
| 837.7315 | 0    | 0.0000 | 1.0000 | 0.2557 | 2.13 |
| 837.7315 | 0.2  | 0.0879 | 0.0327 | 0.4309 | 2.10 |
| 837.7315 | 0.4  | 0.3701 | 0.0000 | 0.7063 | 2.02 |
| 846.1911 | -0.4 | 0.2817 | 0.0000 | 0.2569 | 2.13 |
| 846.1911 | -0.2 | 0.0671 | 0.0733 | 0.2556 | 2.13 |
| 846.1911 | 0    | 0.0000 | 1.0000 | 0.2557 | 2.13 |
| 846.1911 | 0.2  | 0.0672 | 0.0731 | 0.2575 | 2.13 |
| 846.1911 | 0.4  | 0.2823 | 0.0000 | 0.2605 | 2.13 |
| 850.3916 | -0.4 | 0.2926 | 0.0000 | 0.3853 | 2.12 |
| 850.3916 | -0.2 | 0.0707 | 0.0637 | 0.3178 | 2.12 |
| 850.3916 | 0    | 0.0000 | 1.0000 | 0.2557 | 2.13 |
| 850.3916 | 0.2  | 0.0708 | 0.0636 | 0.2005 | 2.13 |
| 850.3916 | 0.4  | 0.2931 | 0.0000 | 0.1528 | 2.13 |
| 851.3382 | -0.4 | 0.3351 | 0.0000 | 0.1148 | 2.11 |
| 851.3382 | -0.2 | 0.0815 | 0.0419 | 0.1755 | 2.12 |
| 851.3382 | 0    | 0.0000 | 1.0000 | 0.2557 | 2.13 |
| 851.3382 | 0.2  | 0.0816 | 0.0418 | 0.3488 | 2.12 |
| 851.3382 | 0.4  | 0.3360 | 0.0000 | 0.4539 | 2.11 |
| 882.5261 | -0.2 | 0.2332 | 0.0001 | 0.3655 | 1.99 |
| 882.5261 | 0    | 0.0000 | 1.0000 | 0.2557 | 2.13 |
| 882.5261 | 0.2  | 0.2304 | 0.0001 | 0.1276 | 1.97 |
| 916.7111 | -0.4 | 0.4096 | 0.0000 | 0.3287 | 2.13 |
| 916.7111 | -0.2 | 0.0978 | 0.0222 | 0.2982 | 2.13 |
| 916.7111 | 0    | 0.0000 | 1.0000 | 0.2557 | 2.13 |
| 916.7111 | 0.2  | 0.0971 | 0.0228 | 0.2084 | 2.11 |
| 916.7111 | 0.4  | 0.4061 | 0.0000 | 0.1745 | 2.08 |
| 918.2242 | -0.4 | 0.4277 | 0.0000 | 0.1924 | 2.12 |
| 918.2242 | -0.2 | 0.1020 | 0.0188 | 0.2258 | 2.12 |
| 918.2242 | 0    | 0.0000 | 1.0000 | 0.2557 | 2.13 |
| 918.2242 | 0.2  | 0.1022 | 0.0187 | 0.2823 | 2.13 |
| 918.2242 | 0.4  | 0.4290 | 0.0000 | 0.3059 | 2.14 |
| 923.6281 | -0.4 | 0.3582 | 0.0000 | 0.1966 | 2.10 |
| 923.6281 | -0.2 | 0.0844 | 0.0374 | 0.2242 | 2.12 |
| 923.6281 | 0    | 0.0000 | 1.0000 | 0.2557 | 2.13 |
| 923.6281 | 0.2  | 0.0845 | 0.0373 | 0.2908 | 2.13 |
| 923.6281 | 0.4  | 0.3582 | 0.0000 | 0.3308 | 2.12 |

|          |      |        |        |        |      |
|----------|------|--------|--------|--------|------|
| 928.7401 | -0.4 | 0.4541 | 0.0000 | 0.3610 | 2.13 |
| 928.7401 | -0.2 | 0.1091 | 0.0143 | 0.3032 | 2.13 |
| 928.7401 | 0    | 0.0000 | 1.0000 | 0.2557 | 2.13 |
| 928.7401 | 0.2  | 0.1088 | 0.0145 | 0.2113 | 2.11 |
| 928.7401 | 0.4  | 0.4513 | 0.0000 | 0.1651 | 2.08 |
| 929.8553 | -0.4 | 0.6197 | 0.0000 | 0.2483 | 2.11 |
| 929.8553 | -0.2 | 0.1524 | 0.0027 | 0.2504 | 2.13 |
| 929.8553 | 0    | 0.0000 | 1.0000 | 0.2557 | 2.13 |
| 929.8553 | 0.2  | 0.1523 | 0.0027 | 0.2589 | 2.12 |
| 929.8553 | 0.4  | 0.6193 | 0.0000 | 0.2562 | 2.10 |
| 935.1128 | -0.4 | 0.3688 | 0.0000 | 0.4687 | 2.12 |
| 935.1128 | -0.2 | 0.0871 | 0.0337 | 0.3491 | 2.13 |
| 935.1128 | 0    | 0.0000 | 1.0000 | 0.2557 | 2.13 |
| 935.1128 | 0.2  | 0.0870 | 0.0338 | 0.1794 | 2.12 |
| 935.1128 | 0.4  | 0.3684 | 0.0000 | 0.1478 | 2.10 |
| 945.1761 | -0.2 | 0.2690 | 0.0000 | 0.3002 | 2.04 |
| 945.1761 | 0    | 0.0000 | 1.0000 | 0.2557 | 2.13 |
| 945.1761 | 0.2  | 0.2686 | 0.0000 | 0.2077 | 2.13 |
| 962.2516 | -0.4 | 0.3951 | 0.0000 | 0.5958 | 2.12 |
| 962.2516 | -0.2 | 0.0914 | 0.0285 | 0.3979 | 2.13 |
| 962.2516 | 0    | 0.0000 | 1.0000 | 0.2557 | 2.13 |
| 962.2516 | 0.2  | 0.0914 | 0.0285 | 0.1527 | 2.13 |
| 962.2516 | 0.4  | 0.3953 | 0.0000 | 0.0846 | 2.12 |
| 966.0444 | -0.4 | 0.4011 | 0.0000 | 0.3631 | 2.12 |
| 966.0444 | -0.2 | 0.0929 | 0.0269 | 0.3047 | 2.13 |
| 966.0444 | 0    | 0.0000 | 1.0000 | 0.2557 | 2.13 |
| 966.0444 | 0.2  | 0.0928 | 0.0270 | 0.2116 | 2.13 |
| 966.0444 | 0.4  | 0.4004 | 0.0000 | 0.1673 | 2.12 |
| 968.0805 | -0.4 | 0.3958 | 0.0000 | 0.2426 | 2.12 |
| 968.0805 | -0.2 | 0.0952 | 0.0246 | 0.2492 | 2.12 |
| 968.0805 | 0    | 0.0000 | 1.0000 | 0.2557 | 2.13 |
| 968.0805 | 0.2  | 0.0949 | 0.0248 | 0.2627 | 2.13 |
| 968.0805 | 0.4  | 0.3949 | 0.0000 | 0.2698 | 2.14 |
| 969.4005 | -0.4 | 0.3897 | 0.0000 | 0.3061 | 2.12 |
| 969.4005 | -0.2 | 0.0937 | 0.0261 | 0.2806 | 2.12 |
| 969.4005 | 0    | 0.0000 | 1.0000 | 0.2557 | 2.13 |

|          |      |        |        |        |      |
|----------|------|--------|--------|--------|------|
| 969.4005 | 0.2  | 0.0939 | 0.0259 | 0.2311 | 2.13 |
| 969.4005 | 0.4  | 0.3905 | 0.0000 | 0.2070 | 2.14 |
| 984.6882 | -0.2 | 0.3206 | 0.0000 | 0.2001 | 2.14 |
| 984.6882 | 0    | 0.0000 | 1.0000 | 0.2557 | 2.13 |
| 984.6882 | 0.2  | 0.3178 | 0.0000 | 0.3140 | 2.09 |
| 990.9975 | -0.4 | 0.3794 | 0.0000 | 0.2654 | 2.13 |
| 990.9975 | -0.2 | 0.0922 | 0.0276 | 0.2603 | 2.13 |
| 990.9975 | 0    | 0.0000 | 1.0000 | 0.2557 | 2.13 |
| 990.9975 | 0.2  | 0.0922 | 0.0276 | 0.2502 | 2.13 |
| 990.9975 | 0.4  | 0.3794 | 0.0000 | 0.2425 | 2.13 |
| 991.9721 | -0.4 | 0.3873 | 0.0000 | 0.2519 | 2.13 |
| 991.9721 | -0.2 | 0.0944 | 0.0254 | 0.2537 | 2.13 |
| 991.9721 | 0    | 0.0000 | 1.0000 | 0.2557 | 2.13 |
| 991.9721 | 0.2  | 0.0944 | 0.0254 | 0.2569 | 2.13 |
| 991.9721 | 0.4  | 0.3876 | 0.0000 | 0.2564 | 2.13 |
| 994.715  | -0.2 | 0.3317 | 0.0000 | 0.2587 | 2.12 |
| 994.715  | 0    | 0.0000 | 1.0000 | 0.2557 | 2.13 |
| 994.715  | 0.2  | 0.3291 | 0.0000 | 0.2477 | 2.12 |
| 1013.264 | -0.2 | 0.4612 | 0.0000 | 0.2351 | 2.14 |
| 1013.264 | 0    | 0.0000 | 1.0000 | 0.2557 | 2.13 |
| 1013.264 | 0.2  | 0.4322 | 0.0000 | 0.2665 | 2.12 |
| 1015.008 | -0.2 | 0.4396 | 0.0000 | 0.2863 | 2.13 |
| 1015.008 | 0    | 0.0000 | 1.0000 | 0.2557 | 2.13 |
| 1015.008 | 0.2  | 0.4678 | 0.0000 | 0.2292 | 2.13 |
| 1050.671 | -0.2 | 0.2749 | 0.0000 | 0.2383 | 2.07 |
| 1050.671 | 0    | 0.0000 | 1.0000 | 0.2557 | 2.13 |
| 1050.671 | 0.2  | 0.2718 | 0.0000 | 0.2718 | 2.18 |
| 1055.513 | -0.4 | 0.7142 | 0.0000 | 0.2656 | 2.07 |
| 1055.513 | -0.2 | 0.1830 | 0.0008 | 0.2614 | 2.10 |
| 1055.513 | 0    | 0.0000 | 1.0000 | 0.2557 | 2.13 |
| 1055.513 | 0.2  | 0.1942 | 0.0005 | 0.2480 | 2.15 |
| 1055.513 | 0.4  | 0.8064 | 0.0000 | 0.2389 | 2.18 |
| 1057.41  | -0.4 | 0.6834 | 0.0000 | 0.2369 | 2.10 |
| 1057.41  | -0.2 | 0.1737 | 0.0012 | 0.2475 | 2.11 |
| 1057.41  | 0    | 0.0000 | 1.0000 | 0.2557 | 2.13 |
| 1057.41  | 0.2  | 0.1817 | 0.0008 | 0.2621 | 2.14 |

|          |      |        |        |        |      |
|----------|------|--------|--------|--------|------|
| 1057.41  | 0.4  | 0.7476 | 0.0000 | 0.2658 | 2.15 |
| 1075.207 | -0.2 | 0.3393 | 0.0000 | 0.3909 | 2.02 |
| 1075.207 | 0    | 0.0000 | 1.0000 | 0.2557 | 2.13 |
| 1075.207 | 0.2  | 0.3263 | 0.0000 | 0.1225 | 2.13 |
| 1115.424 | -0.4 | 0.5753 | 0.0000 | 0.2332 | 2.13 |
| 1115.424 | -0.2 | 0.1427 | 0.0039 | 0.2451 | 2.13 |
| 1115.424 | 0    | 0.0000 | 1.0000 | 0.2557 | 2.13 |
| 1115.424 | 0.2  | 0.1429 | 0.0038 | 0.2656 | 2.13 |
| 1115.424 | 0.4  | 0.5755 | 0.0000 | 0.2757 | 2.12 |
| 1118.536 | -0.4 | 0.5871 | 0.0000 | 0.3215 | 2.10 |
| 1118.536 | -0.2 | 0.1456 | 0.0035 | 0.2880 | 2.12 |
| 1118.536 | 0    | 0.0000 | 1.0000 | 0.2557 | 2.13 |
| 1118.536 | 0.2  | 0.1452 | 0.0035 | 0.2254 | 2.14 |
| 1118.536 | 0.4  | 0.5838 | 0.0000 | 0.1972 | 2.14 |
| 1146.654 | -0.2 | 0.2051 | 0.0003 | 0.1796 | 2.12 |
| 1146.654 | 0    | 0.0000 | 1.0000 | 0.2557 | 2.13 |
| 1146.654 | 0.2  | 0.2069 | 0.0003 | 0.3433 | 2.12 |
| 1151.921 | -0.4 | 0.6470 | 0.0000 | 0.2741 | 2.14 |
| 1151.921 | -0.2 | 0.1603 | 0.0020 | 0.2689 | 2.14 |
| 1151.921 | 0    | 0.0000 | 1.0000 | 0.2557 | 2.13 |
| 1151.921 | 0.2  | 0.1602 | 0.0020 | 0.2352 | 2.11 |
| 1151.921 | 0.4  | 0.6450 | 0.0000 | 0.2094 | 2.09 |
| 1162.573 | -0.4 | 0.6365 | 0.0000 | 0.2570 | 2.14 |
| 1162.573 | -0.2 | 0.1571 | 0.0022 | 0.2576 | 2.14 |
| 1162.573 | 0    | 0.0000 | 1.0000 | 0.2557 | 2.13 |
| 1162.573 | 0.2  | 0.1570 | 0.0022 | 0.2513 | 2.11 |
| 1162.573 | 0.4  | 0.6360 | 0.0000 | 0.2450 | 2.09 |
| 1177.825 | -0.4 | 0.7871 | 0.0000 | 0.3051 | 1.96 |
| 1177.825 | -0.2 | 0.1953 | 0.0005 | 0.2808 | 2.04 |
| 1177.825 | 0    | 0.0000 | 1.0000 | 0.2557 | 2.13 |
| 1177.825 | 0.2  | 0.1965 | 0.0005 | 0.2291 | 2.21 |
| 1177.825 | 0.4  | 0.7975 | 0.0000 | 0.2003 | 2.28 |
| 1191.821 | -0.4 | 0.4754 | 0.0000 | 0.2573 | 2.12 |
| 1191.821 | -0.2 | 0.1166 | 0.0107 | 0.2570 | 2.12 |
| 1191.821 | 0    | 0.0000 | 1.0000 | 0.2557 | 2.13 |
| 1191.821 | 0.2  | 0.1165 | 0.0108 | 0.2538 | 2.13 |

|          |      |        |        |        |      |
|----------|------|--------|--------|--------|------|
| 1191.821 | 0.4  | 0.4745 | 0.0000 | 0.2518 | 2.14 |
| 1192.593 | -0.4 | 0.4936 | 0.0000 | 0.2960 | 2.11 |
| 1192.593 | -0.2 | 0.1211 | 0.0090 | 0.2757 | 2.12 |
| 1192.593 | 0    | 0.0000 | 1.0000 | 0.2557 | 2.13 |
| 1192.593 | 0.2  | 0.1209 | 0.0091 | 0.2372 | 2.13 |
| 1192.593 | 0.4  | 0.4916 | 0.0000 | 0.2201 | 2.14 |
| 1194.435 | -0.2 | 0.2337 | 0.0001 | 0.1810 | 2.14 |
| 1194.435 | 0    | 0.0000 | 1.0000 | 0.2557 | 2.13 |
| 1194.435 | 0.2  | 0.2376 | 0.0001 | 0.3476 | 2.10 |
| 1206.895 | -0.4 | 0.5260 | 0.0000 | 0.2270 | 2.17 |
| 1206.895 | -0.2 | 0.1310 | 0.0061 | 0.2429 | 2.15 |
| 1206.895 | 0    | 0.0000 | 1.0000 | 0.2557 | 2.13 |
| 1206.895 | 0.2  | 0.1316 | 0.0060 | 0.2657 | 2.10 |
| 1206.895 | 0.4  | 0.5321 | 0.0000 | 0.2729 | 2.08 |
| 1210.189 | -0.4 | 0.6367 | 0.0000 | 0.2961 | 2.04 |
| 1210.189 | -0.2 | 0.1582 | 0.0021 | 0.2776 | 2.09 |
| 1210.189 | 0    | 0.0000 | 1.0000 | 0.2557 | 2.13 |
| 1210.189 | 0.2  | 0.1580 | 0.0021 | 0.2315 | 2.16 |
| 1210.189 | 0.4  | 0.6359 | 0.0000 | 0.2060 | 2.19 |
| 1212.63  | -0.4 | 0.5701 | 0.0000 | 0.3364 | 2.11 |
| 1212.63  | -0.2 | 0.1428 | 0.0039 | 0.2942 | 2.12 |
| 1212.63  | 0    | 0.0000 | 1.0000 | 0.2557 | 2.13 |
| 1212.63  | 0.2  | 0.1446 | 0.0036 | 0.2208 | 2.13 |
| 1212.63  | 0.4  | 0.5860 | 0.0000 | 0.1887 | 2.12 |
| 1216.107 | -0.4 | 0.6507 | 0.0000 | 0.2034 | 1.99 |
| 1216.107 | -0.2 | 0.1616 | 0.0019 | 0.2306 | 2.06 |
| 1216.107 | 0    | 0.0000 | 1.0000 | 0.2557 | 2.13 |
| 1216.107 | 0.2  | 0.1625 | 0.0018 | 0.2745 | 2.19 |
| 1216.107 | 0.4  | 0.6569 | 0.0000 | 0.2814 | 2.25 |
| 1234.424 | -0.2 | 0.2116 | 0.0003 | 0.2664 | 2.06 |
| 1234.424 | 0    | 0.0000 | 1.0000 | 0.2557 | 2.13 |
| 1234.424 | 0.2  | 0.2142 | 0.0002 | 0.2399 | 2.19 |
| 1250.015 | -0.2 | 0.2132 | 0.0002 | 0.2278 | 2.15 |
| 1250.015 | 0    | 0.0000 | 1.0000 | 0.2557 | 2.13 |
| 1250.015 | 0.2  | 0.2105 | 0.0003 | 0.2771 | 2.10 |
| 1257.771 | -0.2 | 0.2165 | 0.0002 | 0.2829 | 2.14 |



|          |      |        |        |        |      |
|----------|------|--------|--------|--------|------|
| 1257.771 | 0    | 0.0000 | 1.0000 | 0.2557 | 2.13 |
| 1257.771 | 0.2  | 0.2148 | 0.0002 | 0.2216 | 2.11 |
| 1268.475 | -0.2 | 0.3177 | 0.0000 | 0.2673 | 2.08 |
| 1268.475 | 0    | 0.0000 | 1.0000 | 0.2557 | 2.13 |
| 1268.475 | 0.2  | 0.3234 | 0.0000 | 0.2345 | 2.19 |
| 1281.288 | -0.2 | 0.3340 | 0.0000 | 0.2215 | 2.18 |
| 1281.288 | 0    | 0.0000 | 1.0000 | 0.2557 | 2.13 |
| 1281.288 | 0.2  | 0.3261 | 0.0000 | 0.2881 | 2.06 |
| 1296.597 | -0.2 | 0.4809 | 0.0000 | 0.2117 | 2.12 |
| 1296.597 | 0    | 0.0000 | 1.0000 | 0.2557 | 2.13 |
| 1296.597 | 0.2  | 0.5227 | 0.0000 | 0.2445 | 2.10 |
| 1310.471 | -0.2 | 0.3144 | 0.0000 | 0.2509 | 2.16 |
| 1310.471 | 0    | 0.0000 | 1.0000 | 0.2557 | 2.13 |
| 1310.471 | 0.2  | 0.3218 | 0.0000 | 0.2430 | 2.09 |
| 1324.92  | -0.2 | 0.5688 | 0.0000 | 0.3179 | 2.30 |
| 1324.92  | 0    | 0.0000 | 1.0000 | 0.2557 | 2.13 |
| 1324.92  | 0.2  | 0.5899 | 0.0000 | 0.1969 | 1.88 |
| 1338.779 | -0.2 | 0.4915 | 0.0000 | 0.2449 | 2.05 |
| 1338.779 | 0    | 0.0000 | 1.0000 | 0.2557 | 2.13 |
| 1338.779 | 0.2  | 0.4867 | 0.0000 | 0.2525 | 2.19 |
| 1342.38  | -0.2 | 0.4760 | 0.0000 | 0.2077 | 2.04 |
| 1342.38  | 0    | 0.0000 | 1.0000 | 0.2557 | 2.13 |
| 1342.38  | 0.2  | 0.4718 | 0.0000 | 0.2931 | 2.19 |
| 1355.449 | -0.2 | 0.3700 | 0.0000 | 0.2069 | 2.08 |
| 1355.449 | 0    | 0.0000 | 1.0000 | 0.2557 | 2.13 |
| 1355.449 | 0.2  | 0.3695 | 0.0000 | 0.3091 | 2.16 |
| 1360.448 | -0.2 | 0.6547 | 0.0000 | 0.2851 | 2.25 |
| 1360.448 | 0    | 0.0000 | 1.0000 | 0.2557 | 2.13 |
| 1360.448 | 0.2  | 0.6510 | 0.0000 | 0.2080 | 1.96 |
| 1366.4   | -0.2 | 0.5303 | 0.0000 | 0.2612 | 2.13 |
| 1366.4   | 0    | 0.0000 | 1.0000 | 0.2557 | 2.13 |
| 1366.4   | 0.2  | 0.5259 | 0.0000 | 0.2403 | 2.12 |
| 1367.926 | -0.2 | 0.2560 | 0.0000 | 0.2622 | 2.13 |
| 1367.926 | 0    | 0.0000 | 1.0000 | 0.2557 | 2.13 |
| 1367.926 | 0.2  | 0.2561 | 0.0000 | 0.2489 | 2.13 |
| 1377.145 | -0.2 | 0.2940 | 0.0000 | 0.2482 | 2.10 |

|          |      |        |        |        |      |
|----------|------|--------|--------|--------|------|
| 1377.145 | 0    | 0.0000 | 1.0000 | 0.2557 | 2.13 |
| 1377.145 | 0.2  | 0.2884 | 0.0000 | 0.2571 | 2.14 |
| 1399.644 | -0.2 | 1.0408 | 0.0000 | 0.2457 | 2.35 |
| 1399.644 | 0    | 0.0000 | 1.0000 | 0.2557 | 2.13 |
| 1399.644 | 0.2  | 1.0996 | 0.0000 | 0.2664 | 1.95 |
| 1405.91  | -0.2 | 0.6650 | 0.0000 | 0.2063 | 1.92 |
| 1405.91  | 0    | 0.0000 | 1.0000 | 0.2557 | 2.13 |
| 1405.91  | 0.2  | 0.7111 | 0.0000 | 0.2624 | 2.32 |
| 1423.211 | -0.2 | 0.4708 | 0.0000 | 0.2081 | 2.14 |
| 1423.211 | 0    | 0.0000 | 1.0000 | 0.2557 | 2.13 |
| 1423.211 | 0.2  | 0.4815 | 0.0000 | 0.3137 | 2.12 |
| 1436.749 | -0.2 | 0.7130 | 0.0000 | 0.2103 | 2.06 |
| 1436.749 | 0    | 0.0000 | 1.0000 | 0.2557 | 2.13 |
| 1436.749 | 0.2  | 0.6744 | 0.0000 | 0.2849 | 2.21 |
| 1446.842 | -0.2 | 0.3740 | 0.0000 | 0.2139 | 2.14 |
| 1446.842 | 0    | 0.0000 | 1.0000 | 0.2557 | 2.13 |
| 1446.842 | 0.2  | 0.3839 | 0.0000 | 0.3136 | 2.11 |
| 1455.327 | -0.2 | 0.2972 | 0.0000 | 0.2986 | 2.12 |
| 1455.327 | 0    | 0.0000 | 1.0000 | 0.2557 | 2.13 |
| 1455.327 | 0.2  | 0.2996 | 0.0000 | 0.2178 | 2.13 |
| 1467.233 | -0.2 | 0.4573 | 0.0000 | 0.2743 | 2.10 |
| 1467.233 | 0    | 0.0000 | 1.0000 | 0.2557 | 2.13 |
| 1467.233 | 0.2  | 0.4561 | 0.0000 | 0.2441 | 2.15 |
| 1495.458 | -0.2 | 0.8211 | 0.0000 | 0.2730 | 2.20 |
| 1495.458 | 0    | 0.0000 | 1.0000 | 0.2557 | 2.13 |
| 1495.458 | 0.2  | 0.8205 | 0.0000 | 0.2282 | 2.11 |
| 1496.824 | -0.2 | 0.3998 | 0.0000 | 0.2646 | 2.11 |
| 1496.824 | 0    | 0.0000 | 1.0000 | 0.2557 | 2.13 |
| 1496.824 | 0.2  | 0.4006 | 0.0000 | 0.2485 | 2.14 |
| 1506.292 | -0.2 | 0.4308 | 0.0000 | 0.2566 | 2.16 |
| 1506.292 | 0    | 0.0000 | 1.0000 | 0.2557 | 2.13 |
| 1506.292 | 0.2  | 0.4314 | 0.0000 | 0.2533 | 2.10 |
| 1508.475 | -0.2 | 0.5120 | 0.0000 | 0.2754 | 2.21 |
| 1508.475 | 0    | 0.0000 | 1.0000 | 0.2557 | 2.13 |
| 1508.475 | 0.2  | 0.5169 | 0.0000 | 0.2284 | 2.05 |
| 1518.601 | -0.2 | 0.8003 | 0.0000 | 0.2651 | 2.27 |

|          |      |        |        |        |      |
|----------|------|--------|--------|--------|------|
| 1518.601 | 0    | 0.0000 | 1.0000 | 0.2557 | 2.13 |
| 1518.601 | 0.2  | 0.8037 | 0.0000 | 0.1946 | 2.01 |
| 1529.602 | -0.2 | 0.9491 | 0.0000 | 0.1893 | 2.18 |
| 1529.602 | 0    | 0.0000 | 1.0000 | 0.2557 | 2.13 |
| 1529.602 | 0.2  | 0.9618 | 0.0000 | 0.3145 | 2.06 |
| 1532.806 | -0.2 | 0.4038 | 0.0000 | 0.2765 | 2.12 |
| 1532.806 | 0    | 0.0000 | 1.0000 | 0.2557 | 2.13 |
| 1532.806 | 0.2  | 0.4040 | 0.0000 | 0.2383 | 2.13 |
| 1534.29  | -0.2 | 0.5691 | 0.0000 | 0.1869 | 2.12 |
| 1534.29  | 0    | 0.0000 | 1.0000 | 0.2557 | 2.13 |
| 1534.29  | 0.2  | 0.5702 | 0.0000 | 0.3188 | 2.12 |
| 1537.712 | -0.2 | 0.3880 | 0.0000 | 0.2973 | 2.13 |
| 1537.712 | 0    | 0.0000 | 1.0000 | 0.2557 | 2.13 |
| 1537.712 | 0.2  | 0.3866 | 0.0000 | 0.2191 | 2.12 |
| 1569.609 | -0.2 | 1.0298 | 0.0000 | 0.1767 | 2.12 |
| 1569.609 | 0    | 0.0000 | 1.0000 | 0.2557 | 2.13 |
| 1569.609 | 0.2  | 1.1355 | 0.0000 | 0.2446 | 2.08 |
| 1587.548 | -0.2 | 1.0362 | 0.0000 | 0.2458 | 2.08 |
| 1587.548 | 0    | 0.0000 | 1.0000 | 0.2557 | 2.13 |
| 1587.548 | 0.2  | 0.9765 | 0.0000 | 0.2119 | 2.13 |
| 1598.763 | -0.2 | 1.0398 | 0.0000 | 0.1977 | 2.15 |
| 1598.763 | 0    | 0.0000 | 1.0000 | 0.2557 | 2.13 |
| 1598.763 | 0.2  | 1.0339 | 0.0000 | 0.2399 | 2.02 |
| 1618.826 | -0.2 | 1.0441 | 0.0000 | 0.2300 | 1.88 |
| 1618.826 | 0    | 0.0000 | 1.0000 | 0.2557 | 2.13 |
| 1618.826 | 0.2  | 1.1381 | 0.0000 | 0.2465 | 2.35 |
| 1627.449 | -0.2 | 1.0716 | 0.0000 | 0.2046 | 2.03 |
| 1627.449 | 0    | 0.0000 | 1.0000 | 0.2557 | 2.13 |
| 1627.449 | 0.2  | 1.0423 | 0.0000 | 0.3249 | 2.20 |
| 1631.686 | -0.2 | 1.1736 | 0.0000 | 0.2413 | 2.36 |
| 1631.686 | 0    | 0.0000 | 1.0000 | 0.2557 | 2.13 |
| 1631.686 | 0.2  | 1.1495 | 0.0000 | 0.1764 | 1.84 |
| 1636.246 | -0.2 | 1.1584 | 0.0000 | 0.2513 | 2.13 |
| 1636.246 | 0    | 0.0000 | 1.0000 | 0.2557 | 2.13 |
| 1636.246 | 0.2  | 1.1305 | 0.0000 | 0.2774 | 2.12 |
| 1643.883 | -0.2 | 1.0345 | 0.0000 | 0.2575 | 2.11 |

|          |      |        |        |        |      |
|----------|------|--------|--------|--------|------|
| 1643.883 | 0    | 0.0000 | 1.0000 | 0.2557 | 2.13 |
| 1643.883 | 0.2  | 1.0795 | 0.0000 | 0.2880 | 2.12 |
| 1651.928 | -0.2 | 1.1138 | 0.0000 | 0.2053 | 1.95 |
| 1651.928 | 0    | 0.0000 | 1.0000 | 0.2557 | 2.13 |
| 1651.928 | 0.2  | 1.1777 | 0.0000 | 0.2868 | 2.28 |
| 1662.899 | -0.2 | 1.4520 | 0.0000 | 0.1831 | 1.64 |
| 1662.899 | 0    | 0.0000 | 1.0000 | 0.2557 | 2.13 |
| 1662.899 | 0.2  | 1.0615 | 0.0000 | 0.0688 | 2.36 |
| 3173.951 | -0.2 | 0.8179 | 0.0000 | 0.2583 | 2.13 |
| 3173.951 | 0    | 0.0000 | 1.0000 | 0.2557 | 2.13 |
| 3173.951 | 0.2  | 0.8240 | 0.0000 | 0.2547 | 2.13 |
| 3174.25  | -0.2 | 0.8608 | 0.0000 | 0.2547 | 2.13 |
| 3174.25  | 0    | 0.0000 | 1.0000 | 0.2557 | 2.13 |
| 3174.25  | 0.2  | 0.7915 | 0.0000 | 0.2580 | 2.12 |
| 3176.503 | -0.2 | 0.7898 | 0.0000 | 0.2558 | 2.12 |
| 3176.503 | 0    | 0.0000 | 1.0000 | 0.2557 | 2.13 |
| 3176.503 | 0.2  | 0.8532 | 0.0000 | 0.2558 | 2.13 |
| 3177.723 | -0.2 | 0.8864 | 0.0000 | 0.2570 | 2.13 |
| 3177.723 | 0    | 0.0000 | 1.0000 | 0.2557 | 2.13 |
| 3177.723 | 0.2  | 0.7682 | 0.0000 | 0.2547 | 2.12 |
| 3180.94  | -0.2 | 1.2060 | 0.0000 | 0.2485 | 2.13 |
| 3180.94  | 0    | 0.0000 | 1.0000 | 0.2557 | 2.13 |
| 3180.94  | 0.2  | 0.5816 | 0.0000 | 0.2649 | 2.12 |
| 3187.707 | -0.2 | 0.9069 | 0.0000 | 0.2523 | 2.13 |
| 3187.707 | 0    | 0.0000 | 1.0000 | 0.2557 | 2.13 |
| 3187.707 | 0.2  | 0.7699 | 0.0000 | 0.2562 | 2.13 |
| 3187.991 | -0.2 | 0.8877 | 0.0000 | 0.2595 | 2.13 |
| 3187.991 | 0    | 0.0000 | 1.0000 | 0.2557 | 2.13 |
| 3187.991 | 0.2  | 0.7896 | 0.0000 | 0.2496 | 2.13 |
| 3192.895 | -0.2 | 0.7701 | 0.0000 | 0.2568 | 2.13 |
| 3192.895 | 0    | 0.0000 | 1.0000 | 0.2557 | 2.13 |
| 3192.895 | 0.2  | 0.9154 | 0.0000 | 0.2543 | 2.13 |
| 3194.942 | -0.2 | 0.9333 | 0.0000 | 0.2522 | 2.13 |
| 3194.942 | 0    | 0.0000 | 1.0000 | 0.2557 | 2.13 |
| 3194.942 | 0.2  | 0.7494 | 0.0000 | 0.2600 | 2.13 |
| 3195.46  | -0.2 | 0.9660 | 0.0000 | 0.2543 | 2.13 |

|          |      |        |        |        |      |
|----------|------|--------|--------|--------|------|
| 3195.46  | 0    | 0.0000 | 1.0000 | 0.2557 | 2.13 |
| 3195.46  | 0.2  | 0.7339 | 0.0000 | 0.2573 | 2.13 |
| 3195.735 | -0.2 | 0.9191 | 0.0000 | 0.2532 | 2.13 |
| 3195.735 | 0    | 0.0000 | 1.0000 | 0.2557 | 2.13 |
| 3195.735 | 0.2  | 0.7977 | 0.0000 | 0.2552 | 2.13 |
| 3196.622 | -0.2 | 0.8288 | 0.0000 | 0.2570 | 2.13 |
| 3196.622 | 0    | 0.0000 | 1.0000 | 0.2557 | 2.13 |
| 3196.622 | 0.2  | 0.8921 | 0.0000 | 0.2520 | 2.13 |
| 3197.379 | -0.2 | 0.6730 | 0.0000 | 0.2659 | 2.13 |
| 3197.379 | 0    | 0.0000 | 1.0000 | 0.2557 | 2.13 |
| 3197.379 | 0.2  | 1.0291 | 0.0000 | 0.2459 | 2.12 |
| 3208.706 | -0.2 | 1.2836 | 0.0000 | 0.2812 | 2.12 |
| 3208.706 | 0    | 0.0000 | 1.0000 | 0.2557 | 2.13 |
| 3208.706 | 0.2  | 0.5618 | 0.0000 | 0.2422 | 2.14 |
| 3209.929 | -0.2 | 0.9373 | 0.0000 | 0.2492 | 2.13 |
| 3209.929 | 0    | 0.0000 | 1.0000 | 0.2557 | 2.13 |
| 3209.929 | 0.2  | 0.7786 | 0.0000 | 0.2606 | 2.13 |
| 3210.457 | -0.2 | 0.7125 | 0.0000 | 0.2616 | 2.13 |
| 3210.457 | 0    | 0.0000 | 1.0000 | 0.2557 | 2.13 |
| 3210.457 | 0.2  | 1.0100 | 0.0000 | 0.2477 | 2.13 |
| 3217.316 | -0.2 | 0.6756 | 0.0000 | 0.2501 | 2.13 |
| 3217.316 | 0    | 0.0000 | 1.0000 | 0.2557 | 2.13 |
| 3217.316 | 0.2  | 1.0787 | 0.0000 | 0.2592 | 2.13 |
| 3221.769 | -0.2 | 0.8805 | 0.0000 | 0.2548 | 2.13 |
| 3221.769 | 0    | 0.0000 | 1.0000 | 0.2557 | 2.13 |
| 3221.769 | 0.2  | 0.8425 | 0.0000 | 0.2510 | 2.13 |
| 3221.843 | -0.2 | 0.7126 | 0.0000 | 0.2363 | 2.13 |
| 3221.843 | 0    | 0.0000 | 1.0000 | 0.2557 | 2.13 |
| 3221.843 | 0.2  | 1.0121 | 0.0000 | 0.2705 | 2.13 |
| 3223.328 | -0.2 | 1.1094 | 0.0000 | 0.2594 | 2.12 |
| 3223.328 | 0    | 0.0000 | 1.0000 | 0.2557 | 2.13 |
| 3223.328 | 0.2  | 0.6536 | 0.0000 | 0.2511 | 2.13 |
| 3234.819 | -0.2 | 1.3016 | 0.0000 | 0.2486 | 2.12 |
| 3234.819 | 0    | 0.0000 | 1.0000 | 0.2557 | 2.13 |
| 3234.819 | 0.2  | 0.5731 | 0.0000 | 0.2680 | 2.13 |

**Table S3.** Photo-physical parameters ( $\Delta E_{Q_p}$ ,  $P_{Q_p}(\text{RT})$ ,  $E_{T_1-S_0}$ , and  $\langle T_1 | \hat{H}_{SO} | S_0 \rangle_{Q_p}^2$ ) calculated for geometries allowed by normal-mode vibrations with frequency in  $T_1$  at RT for chromophore **3**.  $\omega_p$  is the wavenumber of the  $p$ th normal vibrational mode in the structure optimized at  $T_1$ .  $Q_p$  is the mass weighted normal coordinates at  $T_1$ . Calculation regarding geometries was stopped when  $\Delta E_{Q_p}$  becomes larger than 0.2 eV because these geometries with  $\Delta E_{Q_p} > 0.2$  eV are hardly allowed below RT.  $E_{T_1-S_0}$  does not largely change for  $Q_p$  with  $P_{Q_p}(\text{RT}) > 0.01$  which corresponds to geometries much allowed at RT.

| $\omega_p$<br>( $\text{cm}^{-1}$ ) | $Q_p$<br>(a.u.) | $\Delta E_{Q_p}$<br>(eV) | $P_{Q_p}(\text{RT})$ | $\langle T_1   \hat{H}_{SO}   S_0 \rangle_{Q_p}^2$<br>( $\text{cm}^{-2}$ ) | $E_{T_1-S_0}$<br>(eV) |
|------------------------------------|-----------------|--------------------------|----------------------|----------------------------------------------------------------------------|-----------------------|
| 15.40404                           | -1              | 0.0033                   | 0.8791               | 0.3186                                                                     | 2.10                  |
| 15.40404                           | -0.8            | 0.0023                   | 0.9145               | 0.3267                                                                     | 2.10                  |
| 15.40404                           | -0.6            | 0.0016                   | 0.9384               | 0.3359                                                                     | 2.10                  |
| 15.40404                           | -0.4            | 0.0010                   | 0.9604               | 0.3451                                                                     | 2.09                  |
| 15.40404                           | -0.2            | 0.0005                   | 0.9821               | 0.3552                                                                     | 2.09                  |
| 15.40404                           | 0               | 0.0000                   | 1.0000               | 0.3656                                                                     | 2.09                  |
| 15.40404                           | 0.2             | 0.0000                   | 1.0000               | 0.3766                                                                     | 2.09                  |
| 15.40404                           | 0.4             | 0.0000                   | 1.0000               | 0.3883                                                                     | 2.09                  |
| 15.40404                           | 0.6             | 0.0003                   | 0.9874               | 0.4004                                                                     | 2.09                  |
| 15.40404                           | 0.8             | 0.0012                   | 0.9548               | 0.4131                                                                     | 2.09                  |
| 15.40404                           | 1               | 0.0025                   | 0.9064               | 0.4257                                                                     | 2.09                  |
| 18.36152                           | -1              | 0.0055                   | 0.8058               | 0.3402                                                                     | 2.08                  |
| 18.36152                           | -0.8            | 0.0032                   | 0.8833               | 0.3461                                                                     | 2.08                  |
| 18.36152                           | -0.6            | 0.0016                   | 0.9392               | 0.3519                                                                     | 2.09                  |
| 18.36152                           | -0.4            | 0.0006                   | 0.9754               | 0.3568                                                                     | 2.09                  |
| 18.36152                           | -0.2            | 0.0001                   | 0.9948               | 0.3616                                                                     | 2.09                  |
| 18.36152                           | 0               | 0.0000                   | 1.0000               | 0.3656                                                                     | 2.09                  |
| 18.36152                           | 0.2             | 0.0002                   | 0.9921               | 0.3697                                                                     | 2.09                  |
| 18.36152                           | 0.4             | 0.0007                   | 0.9714               | 0.3725                                                                     | 2.09                  |
| 18.36152                           | 0.6             | 0.0017                   | 0.9367               | 0.3751                                                                     | 2.09                  |
| 18.36152                           | 0.8             | 0.0031                   | 0.8860               | 0.3772                                                                     | 2.09                  |

|          |      |        |        |        |      |
|----------|------|--------|--------|--------|------|
| 18.36152 | 1    | 0.0052 | 0.8170 | 0.3791 | 2.09 |
| 19.31795 | -1   | 0.0070 | 0.7614 | 0.3908 | 2.09 |
| 19.31795 | -0.8 | 0.0041 | 0.8510 | 0.3857 | 2.09 |
| 19.31795 | -0.6 | 0.0022 | 0.9164 | 0.3808 | 2.09 |
| 19.31795 | -0.4 | 0.0010 | 0.9608 | 0.3758 | 2.09 |
| 19.31795 | -0.2 | 0.0003 | 0.9878 | 0.3706 | 2.09 |
| 19.31795 | 0    | 0.0000 | 1.0000 | 0.3656 | 2.09 |
| 19.31795 | 0.2  | 0.0001 | 0.9977 | 0.3605 | 2.09 |
| 19.31795 | 0.4  | 0.0005 | 0.9792 | 0.3555 | 2.09 |
| 19.31795 | 0.6  | 0.0016 | 0.9408 | 0.3501 | 2.09 |
| 19.31795 | 0.8  | 0.0034 | 0.8777 | 0.3448 | 2.09 |
| 19.31795 | 1    | 0.0062 | 0.7865 | 0.3399 | 2.09 |
| 21.3418  | -1   | 0.0064 | 0.7789 | 0.3821 | 2.10 |
| 21.3418  | -0.8 | 0.0042 | 0.8489 | 0.3794 | 2.10 |
| 21.3418  | -0.6 | 0.0026 | 0.9035 | 0.3760 | 2.10 |
| 21.3418  | -0.4 | 0.0014 | 0.9461 | 0.3727 | 2.09 |
| 21.3418  | -0.2 | 0.0006 | 0.9786 | 0.3691 | 2.09 |
| 21.3418  | 0    | 0.0000 | 1.0000 | 0.3656 | 2.09 |
| 21.3418  | 0.2  | 0.0000 | 1.0000 | 0.3619 | 2.09 |
| 21.3418  | 0.4  | 0.0005 | 0.9816 | 0.3580 | 2.09 |
| 21.3418  | 0.6  | 0.0020 | 0.9259 | 0.3546 | 2.09 |
| 21.3418  | 0.8  | 0.0044 | 0.8416 | 0.3512 | 2.09 |
| 21.3418  | 1    | 0.0077 | 0.7419 | 0.3473 | 2.09 |
| 28.48751 | -1   | 0.0174 | 0.5077 | 0.3458 | 2.09 |
| 28.48751 | -0.8 | 0.0086 | 0.7155 | 0.3487 | 2.09 |
| 28.48751 | -0.6 | 0.0037 | 0.8654 | 0.3522 | 2.09 |
| 28.48751 | -0.4 | 0.0013 | 0.9510 | 0.3560 | 2.09 |
| 28.48751 | -0.2 | 0.0003 | 0.9896 | 0.3603 | 2.09 |
| 28.48751 | 0    | 0.0000 | 1.0000 | 0.3656 | 2.09 |
| 28.48751 | 0.2  | 0.0003 | 0.9898 | 0.3713 | 2.09 |
| 28.48751 | 0.4  | 0.0013 | 0.9525 | 0.3776 | 2.09 |
| 28.48751 | 0.6  | 0.0036 | 0.8698 | 0.3841 | 2.09 |
| 28.48751 | 0.8  | 0.0083 | 0.7239 | 0.3923 | 2.09 |
| 28.48751 | 1    | 0.0168 | 0.5194 | 0.4004 | 2.09 |
| 44.23038 | -1   | 0.0272 | 0.3467 | 0.3576 | 2.10 |
| 44.23038 | -0.8 | 0.0144 | 0.5717 | 0.3583 | 2.10 |

|          |      |        |        |        |      |
|----------|------|--------|--------|--------|------|
| 44.23038 | -0.6 | 0.0067 | 0.7700 | 0.3594 | 2.10 |
| 44.23038 | -0.4 | 0.0025 | 0.9057 | 0.3610 | 2.10 |
| 44.23038 | -0.2 | 0.0006 | 0.9783 | 0.3629 | 2.09 |
| 44.23038 | 0    | 0.0000 | 1.0000 | 0.3656 | 2.09 |
| 44.23038 | 0.2  | 0.0006 | 0.9768 | 0.3686 | 2.09 |
| 44.23038 | 0.4  | 0.0027 | 0.9018 | 0.3718 | 2.09 |
| 44.23038 | 0.6  | 0.0069 | 0.7636 | 0.3758 | 2.09 |
| 44.23038 | 0.8  | 0.0148 | 0.5631 | 0.3806 | 2.08 |
| 44.23038 | 1    | 0.0280 | 0.3369 | 0.3856 | 2.08 |
| 63.7835  | -1   | 0.0493 | 0.1470 | 0.3955 | 2.08 |
| 63.7835  | -0.8 | 0.0306 | 0.3039 | 0.3911 | 2.08 |
| 63.7835  | -0.6 | 0.0169 | 0.5189 | 0.3864 | 2.09 |
| 63.7835  | -0.4 | 0.0074 | 0.7490 | 0.3806 | 2.09 |
| 63.7835  | -0.2 | 0.0019 | 0.9293 | 0.3737 | 2.09 |
| 63.7835  | 0    | 0.0000 | 1.0000 | 0.3656 | 2.09 |
| 63.7835  | 0.2  | 0.0017 | 0.9355 | 0.3566 | 2.09 |
| 63.7835  | 0.4  | 0.0071 | 0.7583 | 0.3461 | 2.10 |
| 63.7835  | 0.6  | 0.0165 | 0.5271 | 0.3347 | 2.09 |
| 63.7835  | 0.8  | 0.0302 | 0.3087 | 0.3215 | 2.09 |
| 63.7835  | 1    | 0.0489 | 0.1490 | 0.3074 | 2.09 |
| 77.66401 | -1   | 0.0698 | 0.0662 | 0.2768 | 2.10 |
| 77.66401 | -0.8 | 0.0429 | 0.1883 | 0.2945 | 2.10 |
| 77.66401 | -0.6 | 0.0234 | 0.4028 | 0.3126 | 2.10 |
| 77.66401 | -0.4 | 0.0101 | 0.6743 | 0.3303 | 2.10 |
| 77.66401 | -0.2 | 0.0025 | 0.9081 | 0.3478 | 2.10 |
| 77.66401 | 0    | 0.0000 | 1.0000 | 0.3656 | 2.09 |
| 77.66401 | 0.2  | 0.0026 | 0.9047 | 0.3833 | 2.09 |
| 77.66401 | 0.4  | 0.0104 | 0.6678 | 0.4005 | 2.09 |
| 77.66401 | 0.6  | 0.0239 | 0.3945 | 0.4177 | 2.09 |
| 77.66401 | 0.8  | 0.0439 | 0.1810 | 0.4344 | 2.09 |
| 77.66401 | 1    | 0.0715 | 0.0618 | 0.4506 | 2.08 |
| 79.57408 | -1   | 0.0818 | 0.0414 | 0.3935 | 2.10 |
| 79.57408 | -0.8 | 0.0491 | 0.1481 | 0.3890 | 2.10 |
| 79.57408 | -0.6 | 0.0262 | 0.3609 | 0.3837 | 2.10 |
| 79.57408 | -0.4 | 0.0112 | 0.6455 | 0.3775 | 2.10 |
| 79.57408 | -0.2 | 0.0028 | 0.8964 | 0.3720 | 2.09 |



|          |      |        |        |        |      |
|----------|------|--------|--------|--------|------|
| 79.57408 | 0    | 0.0000 | 1.0000 | 0.3656 | 2.09 |
| 79.57408 | 0.2  | 0.0025 | 0.9072 | 0.3593 | 2.09 |
| 79.57408 | 0.4  | 0.0106 | 0.6624 | 0.3526 | 2.09 |
| 79.57408 | 0.6  | 0.0251 | 0.3766 | 0.3451 | 2.09 |
| 79.57408 | 0.8  | 0.0474 | 0.1578 | 0.3374 | 2.09 |
| 79.57408 | 1    | 0.0796 | 0.0452 | 0.3297 | 2.09 |
| 93.08721 | -1   | 0.0903 | 0.0298 | 0.2561 | 2.10 |
| 93.08721 | -0.8 | 0.0557 | 0.1143 | 0.2743 | 2.10 |
| 93.08721 | -0.6 | 0.0305 | 0.3056 | 0.2945 | 2.10 |
| 93.08721 | -0.4 | 0.0133 | 0.5960 | 0.3164 | 2.10 |
| 93.08721 | -0.2 | 0.0033 | 0.8786 | 0.3401 | 2.10 |
| 93.08721 | 0    | 0.0000 | 1.0000 | 0.3656 | 2.09 |
| 93.08721 | 0.2  | 0.0032 | 0.8838 | 0.3926 | 2.09 |
| 93.08721 | 0.4  | 0.0130 | 0.6022 | 0.4212 | 2.08 |
| 93.08721 | 0.6  | 0.0302 | 0.3093 | 0.4505 | 2.08 |
| 93.08721 | 0.8  | 0.0555 | 0.1153 | 0.4808 | 2.07 |
| 93.08721 | 1    | 0.0904 | 0.0297 | 0.5115 | 2.06 |
| 121.2646 | -1   | 0.1681 | 0.0014 | 0.2038 | 2.09 |
| 121.2646 | -0.8 | 0.1025 | 0.0185 | 0.2319 | 2.10 |
| 121.2646 | -0.6 | 0.0554 | 0.1159 | 0.2625 | 2.10 |
| 121.2646 | -0.4 | 0.0239 | 0.3950 | 0.2949 | 2.10 |
| 121.2646 | -0.2 | 0.0059 | 0.7959 | 0.3296 | 2.10 |
| 121.2646 | 0    | 0.0000 | 1.0000 | 0.3656 | 2.09 |
| 121.2646 | 0.2  | 0.0059 | 0.7951 | 0.4033 | 2.09 |
| 121.2646 | 0.4  | 0.0240 | 0.3936 | 0.4429 | 2.07 |
| 121.2646 | 0.6  | 0.0555 | 0.1152 | 0.4834 | 2.06 |
| 121.2646 | 0.8  | 0.1028 | 0.0183 | 0.5239 | 2.04 |
| 121.2646 | 1    | 0.1686 | 0.0014 | 0.5643 | 2.02 |
| 134.8478 | -1   | 0.1656 | 0.0016 | 0.4351 | 2.09 |
| 134.8478 | -0.8 | 0.1029 | 0.0183 | 0.4233 | 2.09 |
| 134.8478 | -0.6 | 0.0564 | 0.1112 | 0.4104 | 2.09 |
| 134.8478 | -0.4 | 0.0246 | 0.3841 | 0.3965 | 2.09 |
| 134.8478 | -0.2 | 0.0061 | 0.7901 | 0.3812 | 2.09 |
| 134.8478 | 0    | 0.0000 | 1.0000 | 0.3656 | 2.09 |
| 134.8478 | 0.2  | 0.0061 | 0.7899 | 0.3491 | 2.09 |
| 134.8478 | 0.4  | 0.0243 | 0.3883 | 0.3327 | 2.09 |

|          |      |        |        |        |      |
|----------|------|--------|--------|--------|------|
| 134.8478 | 0.6  | 0.0553 | 0.1162 | 0.3158 | 2.09 |
| 134.8478 | 0.8  | 0.1001 | 0.0203 | 0.2985 | 2.09 |
| 134.8478 | 1    | 0.1601 | 0.0020 | 0.2813 | 2.08 |
| 140.1908 | -1   | 0.1765 | 0.0010 | 0.4591 | 2.10 |
| 140.1908 | -0.8 | 0.1101 | 0.0138 | 0.4402 | 2.10 |
| 140.1908 | -0.6 | 0.0606 | 0.0945 | 0.4215 | 2.10 |
| 140.1908 | -0.4 | 0.0265 | 0.3565 | 0.4029 | 2.10 |
| 140.1908 | -0.2 | 0.0066 | 0.7747 | 0.3837 | 2.10 |
| 140.1908 | 0    | 0.0000 | 1.0000 | 0.3656 | 2.09 |
| 140.1908 | 0.2  | 0.0066 | 0.7748 | 0.3475 | 2.09 |
| 140.1908 | 0.4  | 0.0263 | 0.3586 | 0.3294 | 2.09 |
| 140.1908 | 0.6  | 0.0600 | 0.0968 | 0.3123 | 2.08 |
| 140.1908 | 0.8  | 0.1085 | 0.0146 | 0.2953 | 2.08 |
| 140.1908 | 1    | 0.1735 | 0.0012 | 0.2788 | 2.08 |
| 142.4348 | -1   | 0.2133 | 0.0002 | 0.2103 | 2.09 |
| 142.4348 | -0.8 | 0.1328 | 0.0057 | 0.2364 | 2.09 |
| 142.4348 | -0.6 | 0.0731 | 0.0582 | 0.2645 | 2.09 |
| 142.4348 | -0.4 | 0.0319 | 0.2886 | 0.2957 | 2.09 |
| 142.4348 | -0.2 | 0.0079 | 0.7353 | 0.3295 | 2.09 |
| 142.4348 | 0    | 0.0000 | 1.0000 | 0.3656 | 2.09 |
| 142.4348 | 0.2  | 0.0079 | 0.7364 | 0.4047 | 2.09 |
| 142.4348 | 0.4  | 0.0317 | 0.2912 | 0.4464 | 2.09 |
| 142.4348 | 0.6  | 0.0723 | 0.0599 | 0.4902 | 2.09 |
| 142.4348 | 0.8  | 0.1313 | 0.0060 | 0.5363 | 2.08 |
| 142.4348 | 1    | 0.2105 | 0.0003 | 0.5848 | 2.08 |
| 147.8437 | -1   | 0.2355 | 0.0001 | 0.5356 | 2.04 |
| 147.8437 | -0.8 | 0.1492 | 0.0030 | 0.4955 | 2.05 |
| 147.8437 | -0.6 | 0.0832 | 0.0392 | 0.4595 | 2.06 |
| 147.8437 | -0.4 | 0.0368 | 0.2390 | 0.4255 | 2.07 |
| 147.8437 | -0.2 | 0.0091 | 0.7006 | 0.3946 | 2.08 |
| 147.8437 | 0    | 0.0000 | 1.0000 | 0.3656 | 2.09 |
| 147.8437 | 0.2  | 0.0093 | 0.6960 | 0.3391 | 2.10 |
| 147.8437 | 0.4  | 0.0373 | 0.2345 | 0.3154 | 2.11 |
| 147.8437 | 0.6  | 0.0845 | 0.0373 | 0.2936 | 2.12 |
| 147.8437 | 0.8  | 0.1517 | 0.0027 | 0.2740 | 2.12 |
| 147.8437 | 1    | 0.2401 | 0.0001 | 0.2565 | 2.12 |

|          |      |        |        |        |      |
|----------|------|--------|--------|--------|------|
| 150.8789 | -1   | 0.1887 | 0.0006 | 0.3610 | 2.09 |
| 150.8789 | -0.8 | 0.1161 | 0.0109 | 0.3622 | 2.09 |
| 150.8789 | -0.6 | 0.0632 | 0.0855 | 0.3632 | 2.09 |
| 150.8789 | -0.4 | 0.0274 | 0.3443 | 0.3644 | 2.09 |
| 150.8789 | -0.2 | 0.0067 | 0.7691 | 0.3649 | 2.09 |
| 150.8789 | 0    | 0.0000 | 1.0000 | 0.3656 | 2.09 |
| 150.8789 | 0.2  | 0.0067 | 0.7713 | 0.3661 | 2.09 |
| 150.8789 | 0.4  | 0.0269 | 0.3508 | 0.3667 | 2.09 |
| 150.8789 | 0.6  | 0.0617 | 0.0907 | 0.3670 | 2.09 |
| 150.8789 | 0.8  | 0.1125 | 0.0126 | 0.3676 | 2.10 |
| 150.8789 | 1    | 0.1815 | 0.0009 | 0.3678 | 2.10 |
| 165.9329 | -1   | 0.2945 | 0.0000 | 0.5057 | 2.05 |
| 165.9329 | -0.8 | 0.1879 | 0.0007 | 0.4748 | 2.06 |
| 165.9329 | -0.6 | 0.1055 | 0.0165 | 0.4451 | 2.07 |
| 165.9329 | -0.4 | 0.0469 | 0.1612 | 0.4169 | 2.08 |
| 165.9329 | -0.2 | 0.0118 | 0.6322 | 0.3901 | 2.09 |
| 165.9329 | 0    | 0.0000 | 1.0000 | 0.3656 | 2.09 |
| 165.9329 | 0.2  | 0.0115 | 0.6380 | 0.3418 | 2.10 |
| 165.9329 | 0.4  | 0.0465 | 0.1637 | 0.3194 | 2.11 |
| 165.9329 | 0.6  | 0.1051 | 0.0167 | 0.2978 | 2.11 |
| 165.9329 | 0.8  | 0.1876 | 0.0007 | 0.2774 | 2.11 |
| 165.9329 | 1    | 0.2944 | 0.0000 | 0.2572 | 2.12 |
| 182.8979 | -0.8 | 0.2110 | 0.0003 | 0.5932 | 2.06 |
| 182.8979 | -0.6 | 0.1169 | 0.0106 | 0.5230 | 2.07 |
| 182.8979 | -0.4 | 0.0513 | 0.1360 | 0.4612 | 2.08 |
| 182.8979 | -0.2 | 0.0127 | 0.6101 | 0.4090 | 2.09 |
| 182.8979 | 0    | 0.0000 | 1.0000 | 0.3656 | 2.09 |
| 182.8979 | 0.2  | 0.0125 | 0.6145 | 0.3299 | 2.10 |
| 182.8979 | 0.4  | 0.0500 | 0.1431 | 0.3012 | 2.10 |
| 182.8979 | 0.6  | 0.1126 | 0.0125 | 0.2780 | 2.10 |
| 182.8979 | 0.8  | 0.2010 | 0.0004 | 0.2595 | 2.10 |
| 202.7845 | -0.8 | 0.2642 | 0.0000 | 0.6510 | 1.98 |
| 202.7845 | -0.6 | 0.1460 | 0.0034 | 0.5555 | 2.02 |
| 202.7845 | -0.4 | 0.0641 | 0.0825 | 0.4778 | 2.05 |
| 202.7845 | -0.2 | 0.0159 | 0.5378 | 0.4156 | 2.07 |
| 202.7845 | 0    | 0.0000 | 1.0000 | 0.3656 | 2.09 |

|          |      |        |        |        |      |
|----------|------|--------|--------|--------|------|
| 202.7845 | 0.2  | 0.0158 | 0.5404 | 0.3261 | 2.11 |
| 202.7845 | 0.4  | 0.0638 | 0.0834 | 0.2942 | 2.12 |
| 202.7845 | 0.6  | 0.1453 | 0.0035 | 0.2684 | 2.13 |
| 202.7845 | 0.8  | 0.2624 | 0.0000 | 0.2472 | 2.13 |
| 216.018  | -0.8 | 0.3257 | 0.0000 | 0.5155 | 2.04 |
| 216.018  | -0.6 | 0.1786 | 0.0010 | 0.4691 | 2.05 |
| 216.018  | -0.4 | 0.0776 | 0.0488 | 0.4293 | 2.07 |
| 216.018  | -0.2 | 0.0190 | 0.4778 | 0.3949 | 2.08 |
| 216.018  | 0    | 0.0000 | 1.0000 | 0.3656 | 2.09 |
| 216.018  | 0.2  | 0.0188 | 0.4805 | 0.3408 | 2.10 |
| 216.018  | 0.4  | 0.0746 | 0.0548 | 0.3191 | 2.11 |
| 216.018  | 0.6  | 0.1675 | 0.0015 | 0.3007 | 2.12 |
| 216.018  | 0.8  | 0.2987 | 0.0000 | 0.2852 | 2.13 |
| 241.898  | -0.6 | 0.2028 | 0.0004 | 0.4624 | 2.04 |
| 241.898  | -0.4 | 0.0877 | 0.0329 | 0.4315 | 2.07 |
| 241.898  | -0.2 | 0.0216 | 0.4322 | 0.3988 | 2.08 |
| 241.898  | 0    | 0.0000 | 1.0000 | 0.3656 | 2.09 |
| 241.898  | 0.2  | 0.0215 | 0.4338 | 0.3345 | 2.10 |
| 241.898  | 0.4  | 0.0872 | 0.0336 | 0.3067 | 2.09 |
| 241.898  | 0.6  | 0.2014 | 0.0004 | 0.2835 | 2.08 |
| 246.6435 | -0.8 | 0.2327 | 0.0001 | 0.3473 | 2.10 |
| 246.6435 | -0.6 | 0.1134 | 0.0121 | 0.3514 | 2.10 |
| 246.6435 | -0.4 | 0.0445 | 0.1769 | 0.3558 | 2.10 |
| 246.6435 | -0.2 | 0.0102 | 0.6726 | 0.3607 | 2.10 |
| 246.6435 | 0    | 0.0000 | 1.0000 | 0.3656 | 2.09 |
| 246.6435 | 0.2  | 0.0101 | 0.6748 | 0.3715 | 2.09 |
| 246.6435 | 0.4  | 0.0441 | 0.1796 | 0.3769 | 2.09 |
| 246.6435 | 0.6  | 0.1127 | 0.0124 | 0.3833 | 2.09 |
| 246.6435 | 0.8  | 0.2318 | 0.0001 | 0.3901 | 2.08 |
| 248.8315 | -0.8 | 0.2322 | 0.0001 | 0.3432 | 2.10 |
| 248.8315 | -0.6 | 0.1132 | 0.0122 | 0.3481 | 2.10 |
| 248.8315 | -0.4 | 0.0445 | 0.1772 | 0.3541 | 2.10 |
| 248.8315 | -0.2 | 0.0102 | 0.6713 | 0.3597 | 2.10 |
| 248.8315 | 0    | 0.0000 | 1.0000 | 0.3656 | 2.09 |
| 248.8315 | 0.2  | 0.0103 | 0.6688 | 0.3720 | 2.09 |
| 248.8315 | 0.4  | 0.0451 | 0.1726 | 0.3784 | 2.09 |

|          |      |        |        |        |      |
|----------|------|--------|--------|--------|------|
| 248.8315 | 0.6  | 0.1149 | 0.0114 | 0.3850 | 2.09 |
| 248.8315 | 0.8  | 0.2352 | 0.0001 | 0.3920 | 2.08 |
| 267.522  | -0.6 | 0.2615 | 0.0000 | 0.4577 | 2.06 |
| 267.522  | -0.4 | 0.1160 | 0.0110 | 0.4303 | 2.07 |
| 267.522  | -0.2 | 0.0290 | 0.3235 | 0.3995 | 2.08 |
| 267.522  | 0    | 0.0000 | 1.0000 | 0.3656 | 2.09 |
| 267.522  | 0.2  | 0.0291 | 0.3219 | 0.3287 | 2.10 |
| 267.522  | 0.4  | 0.1172 | 0.0104 | 0.2889 | 2.12 |
| 267.522  | 0.6  | 0.2660 | 0.0000 | 0.2477 | 2.13 |
| 280.5514 | -0.6 | 0.2894 | 0.0000 | 0.4272 | 2.06 |
| 280.5514 | -0.4 | 0.1277 | 0.0069 | 0.4079 | 2.07 |
| 280.5514 | -0.2 | 0.0317 | 0.2914 | 0.3873 | 2.08 |
| 280.5514 | 0    | 0.0000 | 1.0000 | 0.3656 | 2.09 |
| 280.5514 | 0.2  | 0.0319 | 0.2894 | 0.3427 | 2.10 |
| 280.5514 | 0.4  | 0.1269 | 0.0071 | 0.3183 | 2.11 |
| 280.5514 | 0.6  | 0.2857 | 0.0000 | 0.2930 | 2.11 |
| 284.5285 | -0.6 | 0.2625 | 0.0000 | 0.4277 | 2.06 |
| 284.5285 | -0.4 | 0.1135 | 0.0121 | 0.4100 | 2.08 |
| 284.5285 | -0.2 | 0.0279 | 0.3371 | 0.3893 | 2.09 |
| 284.5285 | 0    | 0.0000 | 1.0000 | 0.3656 | 2.09 |
| 284.5285 | 0.2  | 0.0278 | 0.3383 | 0.3401 | 2.09 |
| 284.5285 | 0.4  | 0.1136 | 0.0120 | 0.3133 | 2.07 |
| 284.5285 | 0.6  | 0.2632 | 0.0000 | 0.2858 | 2.05 |
| 289.9034 | -0.6 | 0.2676 | 0.0000 | 0.0710 | 2.08 |
| 289.9034 | -0.4 | 0.1161 | 0.0109 | 0.1313 | 2.09 |
| 289.9034 | -0.2 | 0.0286 | 0.3290 | 0.2291 | 2.10 |
| 289.9034 | 0    | 0.0000 | 1.0000 | 0.3656 | 2.09 |
| 289.9034 | 0.2  | 0.0283 | 0.3325 | 0.5405 | 2.08 |
| 289.9034 | 0.4  | 0.1143 | 0.0117 | 0.7505 | 2.06 |
| 289.9034 | 0.6  | 0.2619 | 0.0000 | 0.9899 | 2.03 |
| 307.5823 | -0.6 | 0.3000 | 0.0000 | 0.6040 | 2.02 |
| 307.5823 | -0.4 | 0.1311 | 0.0061 | 0.5204 | 2.05 |
| 307.5823 | -0.2 | 0.0324 | 0.2831 | 0.4400 | 2.07 |
| 307.5823 | 0    | 0.0000 | 1.0000 | 0.3656 | 2.09 |
| 307.5823 | 0.2  | 0.0323 | 0.2841 | 0.2974 | 2.11 |
| 307.5823 | 0.4  | 0.1306 | 0.0062 | 0.2373 | 2.11 |

|          |      |        |        |        |      |
|----------|------|--------|--------|--------|------|
| 307.5823 | 0.6  | 0.2984 | 0.0000 | 0.1847 | 2.11 |
| 319.9816 | -0.6 | 0.3937 | 0.0000 | 1.1045 | 1.93 |
| 319.9816 | -0.4 | 0.1708 | 0.0013 | 0.7856 | 2.01 |
| 319.9816 | -0.2 | 0.0419 | 0.1961 | 0.5419 | 2.06 |
| 319.9816 | 0    | 0.0000 | 1.0000 | 0.3656 | 2.09 |
| 319.9816 | 0.2  | 0.0411 | 0.2023 | 0.2478 | 2.10 |
| 319.9816 | 0.4  | 0.1642 | 0.0017 | 0.1753 | 2.08 |
| 319.9816 | 0.6  | 0.3728 | 0.0000 | 0.1335 | 2.03 |
| 334.7384 | -0.4 | 0.2077 | 0.0003 | 0.2490 | 2.03 |
| 334.7384 | -0.2 | 0.0514 | 0.1351 | 0.3112 | 2.07 |
| 334.7384 | 0    | 0.0000 | 1.0000 | 0.3656 | 2.09 |
| 334.7384 | 0.2  | 0.0518 | 0.1332 | 0.3967 | 2.09 |
| 334.7384 | 0.4  | 0.2102 | 0.0003 | 0.3939 | 2.05 |
| 348.8845 | -0.6 | 0.4208 | 0.0000 | 0.2506 | 2.11 |
| 348.8845 | -0.4 | 0.1852 | 0.0007 | 0.2932 | 2.10 |
| 348.8845 | -0.2 | 0.0461 | 0.1665 | 0.3317 | 2.10 |
| 348.8845 | 0    | 0.0000 | 1.0000 | 0.3656 | 2.09 |
| 348.8845 | 0.2  | 0.0461 | 0.1663 | 0.3955 | 2.09 |
| 348.8845 | 0.4  | 0.1862 | 0.0007 | 0.4221 | 2.08 |
| 348.8845 | 0.6  | 0.4248 | 0.0000 | 0.4457 | 2.08 |
| 351.513  | -0.4 | 0.2014 | 0.0004 | 0.3381 | 2.10 |
| 351.513  | -0.2 | 0.0500 | 0.1427 | 0.3611 | 2.10 |
| 351.513  | 0    | 0.0000 | 1.0000 | 0.3656 | 2.09 |
| 351.513  | 0.2  | 0.0498 | 0.1438 | 0.3554 | 2.07 |
| 351.513  | 0.4  | 0.1993 | 0.0004 | 0.3329 | 2.04 |
| 351.513  | 0.6  | 0.4494 | 0.0000 | 0.3031 | 2.00 |
| 375.0931 | -0.4 | 0.2447 | 0.0001 | 0.4250 | 1.98 |
| 375.0931 | -0.2 | 0.0613 | 0.0920 | 0.3989 | 2.04 |
| 375.0931 | 0    | 0.0000 | 1.0000 | 0.3656 | 2.09 |
| 375.0931 | 0.2  | 0.0618 | 0.0902 | 0.3270 | 2.14 |
| 375.0931 | 0.4  | 0.2483 | 0.0001 | 0.2842 | 2.19 |
| 393.1523 | -0.4 | 0.3063 | 0.0000 | 0.2395 | 2.01 |
| 393.1523 | -0.2 | 0.0770 | 0.0500 | 0.2975 | 2.05 |
| 393.1523 | 0    | 0.0000 | 1.0000 | 0.3656 | 2.09 |
| 393.1523 | 0.2  | 0.0783 | 0.0475 | 0.4423 | 2.13 |
| 393.1523 | 0.4  | 0.3152 | 0.0000 | 0.5257 | 2.16 |

|          |      |        |        |        |      |
|----------|------|--------|--------|--------|------|
| 404.6724 | -0.4 | 0.2801 | 0.0000 | 0.2782 | 2.06 |
| 404.6724 | -0.2 | 0.0699 | 0.0658 | 0.3203 | 2.08 |
| 404.6724 | 0    | 0.0000 | 1.0000 | 0.3656 | 2.09 |
| 404.6724 | 0.2  | 0.0698 | 0.0660 | 0.4124 | 2.11 |
| 404.6724 | 0.4  | 0.2794 | 0.0000 | 0.4604 | 2.13 |
| 410.3266 | -0.4 | 0.3017 | 0.0000 | 0.3502 | 2.01 |
| 410.3266 | -0.2 | 0.0752 | 0.0535 | 0.3557 | 2.06 |
| 410.3266 | 0    | 0.0000 | 1.0000 | 0.3656 | 2.09 |
| 410.3266 | 0.2  | 0.0753 | 0.0533 | 0.3805 | 2.11 |
| 410.3266 | 0.4  | 0.3016 | 0.0000 | 0.3997 | 2.11 |
| 428.9071 | -0.6 | 0.3925 | 0.0000 | 0.3773 | 2.11 |
| 428.9071 | -0.4 | 0.1718 | 0.0012 | 0.3724 | 2.10 |
| 428.9071 | -0.2 | 0.0425 | 0.1910 | 0.3687 | 2.10 |
| 428.9071 | 0    | 0.0000 | 1.0000 | 0.3656 | 2.09 |
| 428.9071 | 0.2  | 0.0425 | 0.1912 | 0.3642 | 2.09 |
| 428.9071 | 0.4  | 0.1716 | 0.0013 | 0.3636 | 2.08 |
| 428.9071 | 0.6  | 0.3918 | 0.0000 | 0.3656 | 2.08 |
| 433.7621 | -0.6 | 0.3831 | 0.0000 | 0.4026 | 2.06 |
| 433.7621 | -0.4 | 0.1677 | 0.0015 | 0.3883 | 2.07 |
| 433.7621 | -0.2 | 0.0416 | 0.1984 | 0.3760 | 2.08 |
| 433.7621 | 0    | 0.0000 | 1.0000 | 0.3656 | 2.09 |
| 433.7621 | 0.2  | 0.0417 | 0.1971 | 0.3567 | 2.10 |
| 433.7621 | 0.4  | 0.1691 | 0.0014 | 0.3484 | 2.11 |
| 433.7621 | 0.6  | 0.3881 | 0.0000 | 0.3409 | 2.12 |
| 444.0827 | -0.6 | 0.4173 | 0.0000 | 0.4099 | 2.09 |
| 444.0827 | -0.4 | 0.1800 | 0.0009 | 0.3932 | 2.09 |
| 444.0827 | -0.2 | 0.0442 | 0.1790 | 0.3781 | 2.09 |
| 444.0827 | 0    | 0.0000 | 1.0000 | 0.3656 | 2.09 |
| 444.0827 | 0.2  | 0.0443 | 0.1783 | 0.3552 | 2.10 |
| 444.0827 | 0.4  | 0.1809 | 0.0009 | 0.3473 | 2.10 |
| 444.0827 | 0.6  | 0.4206 | 0.0000 | 0.3416 | 2.10 |
| 445.4551 | -0.6 | 0.4236 | 0.0000 | 0.3833 | 2.09 |
| 445.4551 | -0.4 | 0.1833 | 0.0008 | 0.3775 | 2.09 |
| 445.4551 | -0.2 | 0.0451 | 0.1728 | 0.3715 | 2.09 |
| 445.4551 | 0    | 0.0000 | 1.0000 | 0.3656 | 2.09 |
| 445.4551 | 0.2  | 0.0453 | 0.1714 | 0.3595 | 2.10 |

|          |      |        |        |        |      |
|----------|------|--------|--------|--------|------|
| 445.4551 | 0.4  | 0.1849 | 0.0007 | 0.3540 | 2.10 |
| 445.4551 | 0.6  | 0.4290 | 0.0000 | 0.3484 | 2.11 |
| 447.5939 | -0.4 | 0.2415 | 0.0001 | 0.5779 | 2.04 |
| 447.5939 | -0.2 | 0.0599 | 0.0973 | 0.4683 | 2.07 |
| 447.5939 | 0    | 0.0000 | 1.0000 | 0.3656 | 2.09 |
| 447.5939 | 0.2  | 0.0598 | 0.0975 | 0.2731 | 2.11 |
| 447.5939 | 0.4  | 0.2403 | 0.0001 | 0.1923 | 2.11 |
| 451.977  | -0.4 | 0.2847 | 0.0000 | 0.3835 | 2.11 |
| 451.977  | -0.2 | 0.0709 | 0.0632 | 0.3801 | 2.10 |
| 451.977  | 0    | 0.0000 | 1.0000 | 0.3656 | 2.09 |
| 451.977  | 0.2  | 0.0709 | 0.0634 | 0.3420 | 2.08 |
| 451.977  | 0.4  | 0.2839 | 0.0000 | 0.3124 | 2.07 |
| 468.2187 | -0.4 | 0.3205 | 0.0000 | 0.2593 | 2.14 |
| 468.2187 | -0.2 | 0.0802 | 0.0440 | 0.3104 | 2.12 |
| 468.2187 | 0    | 0.0000 | 1.0000 | 0.3656 | 2.09 |
| 468.2187 | 0.2  | 0.0807 | 0.0432 | 0.4214 | 2.06 |
| 468.2187 | 0.4  | 0.3252 | 0.0000 | 0.4748 | 2.01 |
| 472.7216 | -0.4 | 0.3478 | 0.0000 | 0.4422 | 2.08 |
| 472.7216 | -0.2 | 0.0867 | 0.0343 | 0.4027 | 2.09 |
| 472.7216 | 0    | 0.0000 | 1.0000 | 0.3656 | 2.09 |
| 472.7216 | 0.2  | 0.0864 | 0.0346 | 0.3316 | 2.10 |
| 472.7216 | 0.4  | 0.3452 | 0.0000 | 0.3007 | 2.09 |
| 477.6501 | -0.4 | 0.4246 | 0.0000 | 0.4479 | 2.15 |
| 477.6501 | -0.2 | 0.1053 | 0.0166 | 0.4052 | 2.13 |
| 477.6501 | 0    | 0.0000 | 1.0000 | 0.3656 | 2.09 |
| 477.6501 | 0.2  | 0.1039 | 0.0175 | 0.3283 | 2.06 |
| 477.6501 | 0.4  | 0.4127 | 0.0000 | 0.2939 | 2.02 |
| 488.3076 | -0.4 | 0.3200 | 0.0000 | 0.5028 | 2.02 |
| 488.3076 | -0.2 | 0.0793 | 0.0456 | 0.4363 | 2.06 |
| 488.3076 | 0    | 0.0000 | 1.0000 | 0.3656 | 2.09 |
| 488.3076 | 0.2  | 0.0788 | 0.0466 | 0.2923 | 2.12 |
| 488.3076 | 0.4  | 0.3144 | 0.0000 | 0.2203 | 2.13 |
| 507.0748 | -0.4 | 0.4594 | 0.0000 | 0.4049 | 2.03 |
| 507.0748 | -0.2 | 0.1153 | 0.0113 | 0.3858 | 2.06 |
| 507.0748 | 0    | 0.0000 | 1.0000 | 0.3656 | 2.09 |
| 507.0748 | 0.2  | 0.1164 | 0.0108 | 0.3441 | 2.12 |



|          |      |        |        |        |      |
|----------|------|--------|--------|--------|------|
| 507.0748 | 0.4  | 0.4682 | 0.0000 | 0.3229 | 2.14 |
| 511.8082 | -0.4 | 0.3322 | 0.0000 | 0.1439 | 2.02 |
| 511.8082 | -0.2 | 0.0827 | 0.0400 | 0.2378 | 2.07 |
| 511.8082 | 0    | 0.0000 | 1.0000 | 0.3656 | 2.09 |
| 511.8082 | 0.2  | 0.0824 | 0.0405 | 0.5248 | 2.10 |
| 511.8082 | 0.4  | 0.3303 | 0.0000 | 0.7210 | 2.08 |
| 513.7712 | -0.4 | 0.2911 | 0.0000 | 0.4155 | 2.08 |
| 513.7712 | -0.2 | 0.0724 | 0.0598 | 0.3909 | 2.09 |
| 513.7712 | 0    | 0.0000 | 1.0000 | 0.3656 | 2.09 |
| 513.7712 | 0.2  | 0.0723 | 0.0600 | 0.3396 | 2.10 |
| 513.7712 | 0.4  | 0.2904 | 0.0000 | 0.3127 | 2.10 |
| 515.5716 | -0.4 | 0.2931 | 0.0000 | 0.3985 | 2.11 |
| 515.5716 | -0.2 | 0.0728 | 0.0589 | 0.3825 | 2.10 |
| 515.5716 | 0    | 0.0000 | 1.0000 | 0.3656 | 2.09 |
| 515.5716 | 0.2  | 0.0727 | 0.0590 | 0.3478 | 2.08 |
| 515.5716 | 0.4  | 0.2926 | 0.0000 | 0.3298 | 2.07 |
| 521.7309 | -0.4 | 0.3568 | 0.0000 | 0.4311 | 2.03 |
| 521.7309 | -0.2 | 0.0891 | 0.0312 | 0.3981 | 2.07 |
| 521.7309 | 0    | 0.0000 | 1.0000 | 0.3656 | 2.09 |
| 521.7309 | 0.2  | 0.0890 | 0.0313 | 0.3309 | 2.11 |
| 521.7309 | 0.4  | 0.3569 | 0.0000 | 0.2938 | 2.12 |
| 526.5411 | -0.4 | 0.3727 | 0.0000 | 0.3004 | 2.11 |
| 526.5411 | -0.2 | 0.0927 | 0.0271 | 0.3323 | 2.10 |
| 526.5411 | 0    | 0.0000 | 1.0000 | 0.3656 | 2.09 |
| 526.5411 | 0.2  | 0.0922 | 0.0276 | 0.3992 | 2.08 |
| 526.5411 | 0.4  | 0.3688 | 0.0000 | 0.4320 | 2.07 |
| 534.6314 | -0.4 | 0.3807 | 0.0000 | 0.4445 | 2.09 |
| 534.6314 | -0.2 | 0.0949 | 0.0249 | 0.4054 | 2.10 |
| 534.6314 | 0    | 0.0000 | 1.0000 | 0.3656 | 2.09 |
| 534.6314 | 0.2  | 0.0950 | 0.0248 | 0.3267 | 2.08 |
| 534.6314 | 0.4  | 0.3803 | 0.0000 | 0.2886 | 2.06 |
| 543.4112 | -0.4 | 0.3938 | 0.0000 | 0.5086 | 2.07 |
| 543.4112 | -0.2 | 0.0977 | 0.0223 | 0.4327 | 2.09 |
| 543.4112 | 0    | 0.0000 | 1.0000 | 0.3656 | 2.09 |
| 543.4112 | 0.2  | 0.0978 | 0.0222 | 0.3020 | 2.10 |
| 543.4112 | 0.4  | 0.3941 | 0.0000 | 0.2392 | 2.09 |

|          |      |        |        |        |      |
|----------|------|--------|--------|--------|------|
| 549.5704 | -0.4 | 0.3860 | 0.0000 | 0.5431 | 2.07 |
| 549.5704 | -0.2 | 0.0959 | 0.0239 | 0.4483 | 2.09 |
| 549.5704 | 0    | 0.0000 | 1.0000 | 0.3656 | 2.09 |
| 549.5704 | 0.2  | 0.0958 | 0.0240 | 0.2975 | 2.09 |
| 549.5704 | 0.4  | 0.3843 | 0.0000 | 0.2453 | 2.08 |
| 556.5681 | -0.4 | 0.5121 | 0.0000 | 0.3254 | 2.09 |
| 556.5681 | -0.2 | 0.1278 | 0.0069 | 0.3438 | 2.09 |
| 556.5681 | 0    | 0.0000 | 1.0000 | 0.3656 | 2.09 |
| 556.5681 | 0.2  | 0.1276 | 0.0070 | 0.3910 | 2.09 |
| 556.5681 | 0.4  | 0.5104 | 0.0000 | 0.4200 | 2.08 |
| 559.8604 | -0.4 | 0.5408 | 0.0000 | 0.3815 | 2.09 |
| 559.8604 | -0.2 | 0.1357 | 0.0051 | 0.3733 | 2.09 |
| 559.8604 | 0    | 0.0000 | 1.0000 | 0.3656 | 2.09 |
| 559.8604 | 0.2  | 0.1370 | 0.0048 | 0.3585 | 2.09 |
| 559.8604 | 0.4  | 0.5513 | 0.0000 | 0.3515 | 2.09 |
| 577.1873 | -0.4 | 0.4455 | 0.0000 | 0.5979 | 2.00 |
| 577.1873 | -0.2 | 0.1104 | 0.0136 | 0.4556 | 2.06 |
| 577.1873 | 0    | 0.0000 | 1.0000 | 0.3656 | 2.09 |
| 577.1873 | 0.2  | 0.1104 | 0.0136 | 0.3070 | 2.11 |
| 577.1873 | 0.4  | 0.4445 | 0.0000 | 0.2668 | 2.09 |
| 586.3107 | -0.4 | 0.5194 | 0.0000 | 0.2790 | 2.08 |
| 586.3107 | -0.2 | 0.1295 | 0.0065 | 0.3209 | 2.09 |
| 586.3107 | 0    | 0.0000 | 1.0000 | 0.3656 | 2.09 |
| 586.3107 | 0.2  | 0.1294 | 0.0065 | 0.4148 | 2.09 |
| 586.3107 | 0.4  | 0.5187 | 0.0000 | 0.4709 | 2.07 |
| 603.3236 | -0.4 | 0.3947 | 0.0000 | 0.4554 | 2.08 |
| 603.3236 | -0.2 | 0.0976 | 0.0224 | 0.4068 | 2.09 |
| 603.3236 | 0    | 0.0000 | 1.0000 | 0.3656 | 2.09 |
| 603.3236 | 0.2  | 0.0978 | 0.0223 | 0.3308 | 2.10 |
| 603.3236 | 0.4  | 0.3951 | 0.0000 | 0.3023 | 2.10 |
| 607.3702 | -0.4 | 0.4944 | 0.0000 | 0.3789 | 2.08 |
| 607.3702 | -0.2 | 0.1229 | 0.0084 | 0.3740 | 2.09 |
| 607.3702 | 0    | 0.0000 | 1.0000 | 0.3656 | 2.09 |
| 607.3702 | 0.2  | 0.1230 | 0.0083 | 0.3546 | 2.10 |
| 607.3702 | 0.4  | 0.4952 | 0.0000 | 0.3426 | 2.10 |
| 622.7969 | -0.4 | 0.6537 | 0.0000 | 0.2301 | 2.07 |

|          |      |        |        |        |      |
|----------|------|--------|--------|--------|------|
| 622.7969 | -0.2 | 0.1586 | 0.0021 | 0.2916 | 2.09 |
| 622.7969 | 0    | 0.0000 | 1.0000 | 0.3656 | 2.09 |
| 622.7969 | 0.2  | 0.1584 | 0.0021 | 0.4588 | 2.08 |
| 622.7969 | 0.4  | 0.6509 | 0.0000 | 0.5814 | 2.05 |
| 639.2499 | -0.2 | 0.2007 | 0.0004 | 0.4129 | 2.06 |
| 639.2499 | 0    | 0.0000 | 1.0000 | 0.3656 | 2.09 |
| 639.2499 | 0.2  | 0.2007 | 0.0004 | 0.3220 | 2.11 |
| 640.0007 | -0.2 | 0.2114 | 0.0003 | 0.2983 | 2.09 |
| 640.0007 | 0    | 0.0000 | 1.0000 | 0.3656 | 2.09 |
| 640.0007 | 0.2  | 0.2114 | 0.0003 | 0.4426 | 2.08 |
| 648.0776 | -0.4 | 0.5386 | 0.0000 | 0.5358 | 2.04 |
| 648.0776 | -0.2 | 0.1333 | 0.0056 | 0.4464 | 2.08 |
| 648.0776 | 0    | 0.0000 | 1.0000 | 0.3656 | 2.09 |
| 648.0776 | 0.2  | 0.1334 | 0.0056 | 0.2944 | 2.08 |
| 648.0776 | 0.4  | 0.5387 | 0.0000 | 0.2330 | 2.05 |
| 651.292  | -0.4 | 0.7982 | 0.0000 | 0.4085 | 2.08 |
| 651.292  | -0.2 | 0.1994 | 0.0004 | 0.3866 | 2.09 |
| 651.292  | 0    | 0.0000 | 1.0000 | 0.3656 | 2.09 |
| 651.292  | 0.2  | 0.1994 | 0.0004 | 0.3452 | 2.09 |
| 651.292  | 0.4  | 0.7982 | 0.0000 | 0.3240 | 2.09 |
| 658.6475 | -0.4 | 0.7874 | 0.0000 | 0.4205 | 2.09 |
| 658.6475 | -0.2 | 0.1968 | 0.0005 | 0.3951 | 2.09 |
| 658.6475 | 0    | 0.0000 | 1.0000 | 0.3656 | 2.09 |
| 658.6475 | 0.2  | 0.1970 | 0.0005 | 0.3325 | 2.09 |
| 658.6475 | 0.4  | 0.7884 | 0.0000 | 0.2951 | 2.09 |
| 673.414  | -0.4 | 0.5218 | 0.0000 | 0.6965 | 2.04 |
| 673.414  | -0.2 | 0.1292 | 0.0066 | 0.5091 | 2.08 |
| 673.414  | 0    | 0.0000 | 1.0000 | 0.3656 | 2.09 |
| 673.414  | 0.2  | 0.1296 | 0.0064 | 0.2594 | 2.10 |
| 673.414  | 0.4  | 0.5248 | 0.0000 | 0.1826 | 2.09 |
| 678.39   | -0.4 | 0.7873 | 0.0000 | 0.4246 | 2.09 |
| 678.39   | -0.2 | 0.1963 | 0.0005 | 0.3918 | 2.09 |
| 678.39   | 0    | 0.0000 | 1.0000 | 0.3656 | 2.09 |
| 678.39   | 0.2  | 0.1955 | 0.0005 | 0.3449 | 2.09 |
| 678.39   | 0.4  | 0.7804 | 0.0000 | 0.3292 | 2.08 |
| 683.4381 | -0.2 | 0.2171 | 0.0002 | 0.3066 | 2.08 |

|          |      |        |        |        |      |
|----------|------|--------|--------|--------|------|
| 683.4381 | 0    | 0.0000 | 1.0000 | 0.3656 | 2.09 |
| 683.4381 | 0.2  | 0.2140 | 0.0002 | 0.4320 | 2.09 |
| 692.0582 | -0.4 | 0.7102 | 0.0000 | 0.6378 | 2.04 |
| 692.0582 | -0.2 | 0.1776 | 0.0010 | 0.4899 | 2.07 |
| 692.0582 | 0    | 0.0000 | 1.0000 | 0.3656 | 2.09 |
| 692.0582 | 0.2  | 0.1779 | 0.0010 | 0.2615 | 2.12 |
| 692.0582 | 0.4  | 0.7135 | 0.0000 | 0.1761 | 2.14 |
| 709.1786 | -0.4 | 0.7010 | 0.0000 | 0.3353 | 2.08 |
| 709.1786 | -0.2 | 0.1749 | 0.0011 | 0.3495 | 2.09 |
| 709.1786 | 0    | 0.0000 | 1.0000 | 0.3656 | 2.09 |
| 709.1786 | 0.2  | 0.1748 | 0.0011 | 0.3857 | 2.10 |
| 709.1786 | 0.4  | 0.7004 | 0.0000 | 0.4088 | 2.10 |
| 712.9853 | -0.4 | 0.5698 | 0.0000 | 0.3557 | 2.08 |
| 712.9853 | -0.2 | 0.1419 | 0.0040 | 0.3592 | 2.09 |
| 712.9853 | 0    | 0.0000 | 1.0000 | 0.3656 | 2.09 |
| 712.9853 | 0.2  | 0.1419 | 0.0040 | 0.3773 | 2.10 |
| 712.9853 | 0.4  | 0.5701 | 0.0000 | 0.3947 | 2.10 |
| 722.0335 | -0.4 | 0.6703 | 0.0000 | 0.3232 | 2.06 |
| 722.0335 | -0.2 | 0.1676 | 0.0015 | 0.3440 | 2.08 |
| 722.0335 | 0    | 0.0000 | 1.0000 | 0.3656 | 2.09 |
| 722.0335 | 0.2  | 0.1680 | 0.0014 | 0.3878 | 2.10 |
| 722.0335 | 0.4  | 0.6738 | 0.0000 | 0.4095 | 2.11 |
| 745.951  | -0.4 | 0.7502 | 0.0000 | 0.3980 | 2.06 |
| 745.951  | -0.2 | 0.1803 | 0.0009 | 0.3752 | 2.09 |
| 745.951  | 0    | 0.0000 | 1.0000 | 0.3656 | 2.09 |
| 745.951  | 0.2  | 0.1813 | 0.0009 | 0.3683 | 2.08 |
| 745.951  | 0.4  | 0.7530 | 0.0000 | 0.3853 | 2.05 |
| 747.601  | -0.4 | 0.2935 | 0.0000 | 0.3954 | 2.10 |
| 747.601  | -0.2 | 0.0698 | 0.0662 | 0.3802 | 2.10 |
| 747.601  | 0    | 0.0000 | 1.0000 | 0.3656 | 2.09 |
| 747.601  | 0.2  | 0.0699 | 0.0659 | 0.3521 | 2.09 |
| 747.601  | 0.4  | 0.2937 | 0.0000 | 0.3394 | 2.09 |
| 748.2742 | -0.4 | 0.3007 | 0.0000 | 0.3837 | 2.08 |
| 748.2742 | -0.2 | 0.0715 | 0.0619 | 0.3741 | 2.09 |
| 748.2742 | 0    | 0.0000 | 1.0000 | 0.3656 | 2.09 |
| 748.2742 | 0.2  | 0.0714 | 0.0621 | 0.3570 | 2.10 |

|          |      |        |        |        |      |
|----------|------|--------|--------|--------|------|
| 748.2742 | 0.4  | 0.3004 | 0.0000 | 0.3496 | 2.10 |
| 757.4    | -0.4 | 0.6957 | 0.0000 | 0.3065 | 2.09 |
| 757.4    | -0.2 | 0.1758 | 0.0011 | 0.3324 | 2.09 |
| 757.4    | 0    | 0.0000 | 1.0000 | 0.3656 | 2.09 |
| 757.4    | 0.2  | 0.1807 | 0.0009 | 0.4061 | 2.09 |
| 757.4    | 0.4  | 0.7353 | 0.0000 | 0.4525 | 2.08 |
| 760.6302 | -0.4 | 0.7502 | 0.0000 | 0.4446 | 2.06 |
| 760.6302 | -0.2 | 0.1906 | 0.0006 | 0.4030 | 2.08 |
| 760.6302 | 0    | 0.0000 | 1.0000 | 0.3656 | 2.09 |
| 760.6302 | 0.2  | 0.1978 | 0.0005 | 0.3316 | 2.11 |
| 760.6302 | 0.4  | 0.8081 | 0.0000 | 0.3006 | 2.12 |
| 762.4313 | -0.4 | 0.5077 | 0.0000 | 0.2094 | 2.06 |
| 762.4313 | -0.2 | 0.1227 | 0.0084 | 0.2576 | 2.08 |
| 762.4313 | 0    | 0.0000 | 1.0000 | 0.3656 | 2.09 |
| 762.4313 | 0.2  | 0.1227 | 0.0084 | 0.4890 | 2.09 |
| 762.4313 | 0.4  | 0.5073 | 0.0000 | 0.6253 | 2.06 |
| 764.7005 | -0.4 | 0.2834 | 0.0000 | 0.3284 | 2.09 |
| 764.7005 | -0.2 | 0.0672 | 0.0732 | 0.3458 | 2.09 |
| 764.7005 | 0    | 0.0000 | 1.0000 | 0.3656 | 2.09 |
| 764.7005 | 0.2  | 0.0672 | 0.0731 | 0.3882 | 2.09 |
| 764.7005 | 0.4  | 0.2833 | 0.0000 | 0.4148 | 2.07 |
| 776.3476 | -0.4 | 0.7461 | 0.0000 | 0.3976 | 2.04 |
| 776.3476 | -0.2 | 0.1858 | 0.0007 | 0.3806 | 2.07 |
| 776.3476 | 0    | 0.0000 | 1.0000 | 0.3656 | 2.09 |
| 776.3476 | 0.2  | 0.1866 | 0.0007 | 0.3545 | 2.10 |
| 776.3476 | 0.4  | 0.7536 | 0.0000 | 0.3499 | 2.08 |
| 778.0253 | -0.4 | 0.6482 | 0.0000 | 0.3972 | 2.05 |
| 778.0253 | -0.2 | 0.1591 | 0.0020 | 0.3855 | 2.08 |
| 778.0253 | 0    | 0.0000 | 1.0000 | 0.3656 | 2.09 |
| 778.0253 | 0.2  | 0.1592 | 0.0020 | 0.3398 | 2.10 |
| 778.0253 | 0.4  | 0.6510 | 0.0000 | 0.3093 | 2.10 |
| 781.2838 | -0.4 | 0.5302 | 0.0000 | 0.1968 | 2.09 |
| 781.2838 | -0.2 | 0.1301 | 0.0063 | 0.2729 | 2.10 |
| 781.2838 | 0    | 0.0000 | 1.0000 | 0.3656 | 2.09 |
| 781.2838 | 0.2  | 0.1299 | 0.0064 | 0.4762 | 2.08 |
| 781.2838 | 0.4  | 0.5286 | 0.0000 | 0.6072 | 2.06 |

|          |      |        |        |        |      |
|----------|------|--------|--------|--------|------|
| 784.4522 | -0.4 | 0.4120 | 0.0000 | 0.2923 | 2.11 |
| 784.4522 | -0.2 | 0.1010 | 0.0196 | 0.3272 | 2.10 |
| 784.4522 | 0    | 0.0000 | 1.0000 | 0.3656 | 2.09 |
| 784.4522 | 0.2  | 0.1010 | 0.0196 | 0.4074 | 2.09 |
| 784.4522 | 0.4  | 0.4117 | 0.0000 | 0.4531 | 2.08 |
| 788.7649 | -0.4 | 0.4792 | 0.0000 | 0.4906 | 2.07 |
| 788.7649 | -0.2 | 0.1185 | 0.0099 | 0.4216 | 2.08 |
| 788.7649 | 0    | 0.0000 | 1.0000 | 0.3656 | 2.09 |
| 788.7649 | 0.2  | 0.1189 | 0.0098 | 0.3207 | 2.10 |
| 788.7649 | 0.4  | 0.4814 | 0.0000 | 0.2850 | 2.10 |
| 793.1046 | -0.4 | 0.4433 | 0.0000 | 0.2273 | 2.08 |
| 793.1046 | -0.2 | 0.1056 | 0.0164 | 0.2831 | 2.09 |
| 793.1046 | 0    | 0.0000 | 1.0000 | 0.3656 | 2.09 |
| 793.1046 | 0.2  | 0.1060 | 0.0162 | 0.4770 | 2.07 |
| 793.1046 | 0.4  | 0.4454 | 0.0000 | 0.6162 | 2.04 |
| 794.3135 | -0.2 | 0.2698 | 0.0000 | 0.3055 | 2.04 |
| 794.3135 | 0    | 0.0000 | 1.0000 | 0.3656 | 2.09 |
| 794.3135 | 0.2  | 0.2691 | 0.0000 | 0.4293 | 2.11 |
| 801.9523 | -0.4 | 0.5404 | 0.0000 | 0.4984 | 2.04 |
| 801.9523 | -0.2 | 0.1320 | 0.0059 | 0.4283 | 2.08 |
| 801.9523 | 0    | 0.0000 | 1.0000 | 0.3656 | 2.09 |
| 801.9523 | 0.2  | 0.1310 | 0.0061 | 0.3137 | 2.09 |
| 801.9523 | 0.4  | 0.5336 | 0.0000 | 0.2796 | 2.08 |
| 810.3101 | -0.4 | 0.5082 | 0.0000 | 0.5969 | 2.05 |
| 810.3101 | -0.2 | 0.1256 | 0.0075 | 0.4581 | 2.08 |
| 810.3101 | 0    | 0.0000 | 1.0000 | 0.3656 | 2.09 |
| 810.3101 | 0.2  | 0.1259 | 0.0075 | 0.3158 | 2.10 |
| 810.3101 | 0.4  | 0.5101 | 0.0000 | 0.3038 | 2.09 |
| 815.1611 | -0.2 | 0.2850 | 0.0000 | 0.3100 | 2.11 |
| 815.1611 | 0    | 0.0000 | 1.0000 | 0.3656 | 2.09 |
| 815.1611 | 0.2  | 0.2860 | 0.0000 | 0.4254 | 2.07 |
| 825.4647 | -0.4 | 0.3363 | 0.0000 | 0.2669 | 2.08 |
| 825.4647 | -0.2 | 0.0804 | 0.0438 | 0.3106 | 2.09 |
| 825.4647 | 0    | 0.0000 | 1.0000 | 0.3656 | 2.09 |
| 825.4647 | 0.2  | 0.0800 | 0.0445 | 0.4308 | 2.08 |
| 825.4647 | 0.4  | 0.3340 | 0.0000 | 0.5022 | 2.05 |

|          |      |        |        |        |      |
|----------|------|--------|--------|--------|------|
| 836.8992 | -0.4 | 0.4517 | 0.0000 | 0.2672 | 2.06 |
| 836.8992 | -0.2 | 0.1082 | 0.0148 | 0.3004 | 2.09 |
| 836.8992 | 0    | 0.0000 | 1.0000 | 0.3656 | 2.09 |
| 836.8992 | 0.2  | 0.1060 | 0.0162 | 0.4678 | 2.08 |
| 836.8992 | 0.4  | 0.4333 | 0.0000 | 0.6134 | 2.04 |
| 837.1327 | -0.4 | 0.6341 | 0.0000 | 0.2605 | 2.09 |
| 837.1327 | -0.2 | 0.1597 | 0.0020 | 0.3018 | 2.09 |
| 837.1327 | 0    | 0.0000 | 1.0000 | 0.3656 | 2.09 |
| 837.1327 | 0.2  | 0.1648 | 0.0016 | 0.4550 | 2.08 |
| 837.1327 | 0.4  | 0.6750 | 0.0000 | 0.5749 | 2.05 |
| 840.0861 | -0.4 | 0.3779 | 0.0000 | 0.3915 | 2.09 |
| 840.0861 | -0.2 | 0.0907 | 0.0293 | 0.3758 | 2.09 |
| 840.0861 | 0    | 0.0000 | 1.0000 | 0.3656 | 2.09 |
| 840.0861 | 0.2  | 0.0906 | 0.0294 | 0.3612 | 2.09 |
| 840.0861 | 0.4  | 0.3776 | 0.0000 | 0.3622 | 2.09 |
| 847.0841 | -0.4 | 0.4403 | 0.0000 | 0.3097 | 2.09 |
| 847.0841 | -0.2 | 0.1055 | 0.0165 | 0.3370 | 2.09 |
| 847.0841 | 0    | 0.0000 | 1.0000 | 0.3656 | 2.09 |
| 847.0841 | 0.2  | 0.1056 | 0.0164 | 0.3972 | 2.09 |
| 847.0841 | 0.4  | 0.4409 | 0.0000 | 0.4329 | 2.09 |
| 848.0743 | -0.4 | 0.5392 | 0.0000 | 0.4782 | 2.07 |
| 848.0743 | -0.2 | 0.1307 | 0.0062 | 0.4135 | 2.08 |
| 848.0743 | 0    | 0.0000 | 1.0000 | 0.3656 | 2.09 |
| 848.0743 | 0.2  | 0.1304 | 0.0063 | 0.3290 | 2.10 |
| 848.0743 | 0.4  | 0.5376 | 0.0000 | 0.2980 | 2.11 |
| 851.7578 | -0.4 | 0.3620 | 0.0000 | 0.1594 | 2.08 |
| 851.7578 | -0.2 | 0.0868 | 0.0340 | 0.2560 | 2.09 |
| 851.7578 | 0    | 0.0000 | 1.0000 | 0.3656 | 2.09 |
| 851.7578 | 0.2  | 0.0869 | 0.0340 | 0.4865 | 2.09 |
| 851.7578 | 0.4  | 0.3625 | 0.0000 | 0.6203 | 2.07 |
| 878.0852 | -0.4 | 0.3414 | 0.0000 | 0.3633 | 2.10 |
| 878.0852 | -0.2 | 0.0802 | 0.0440 | 0.3653 | 2.09 |
| 878.0852 | 0    | 0.0000 | 1.0000 | 0.3656 | 2.09 |
| 878.0852 | 0.2  | 0.0801 | 0.0442 | 0.3641 | 2.09 |
| 878.0852 | 0.4  | 0.3409 | 0.0000 | 0.3599 | 2.09 |
| 878.1682 | -0.4 | 0.3408 | 0.0000 | 0.3693 | 2.09 |

|          |      |        |        |        |      |
|----------|------|--------|--------|--------|------|
| 878.1682 | -0.2 | 0.0801 | 0.0443 | 0.3671 | 2.09 |
| 878.1682 | 0    | 0.0000 | 1.0000 | 0.3656 | 2.09 |
| 878.1682 | 0.2  | 0.0801 | 0.0442 | 0.3647 | 2.09 |
| 878.1682 | 0.4  | 0.3411 | 0.0000 | 0.3629 | 2.10 |
| 890.3477 | -0.4 | 0.3912 | 0.0000 | 0.3681 | 2.09 |
| 890.3477 | -0.2 | 0.0873 | 0.0334 | 0.3684 | 2.09 |
| 890.3477 | 0    | 0.0000 | 1.0000 | 0.3656 | 2.09 |
| 890.3477 | 0.2  | 0.0869 | 0.0340 | 0.3639 | 2.10 |
| 890.3477 | 0.4  | 0.3908 | 0.0000 | 0.3668 | 2.10 |
| 890.829  | -0.4 | 0.3913 | 0.0000 | 0.3438 | 2.09 |
| 890.829  | -0.2 | 0.0874 | 0.0333 | 0.3524 | 2.09 |
| 890.829  | 0    | 0.0000 | 1.0000 | 0.3656 | 2.09 |
| 890.829  | 0.2  | 0.0872 | 0.0335 | 0.3807 | 2.09 |
| 890.829  | 0.4  | 0.3898 | 0.0000 | 0.4001 | 2.08 |
| 907.3498 | -0.2 | 0.2908 | 0.0000 | 0.3852 | 2.08 |
| 907.3498 | 0    | 0.0000 | 1.0000 | 0.3656 | 2.09 |
| 907.3498 | 0.2  | 0.2860 | 0.0000 | 0.3412 | 2.09 |
| 922.148  | -0.4 | 0.6335 | 0.0000 | 0.6670 | 1.91 |
| 922.148  | -0.2 | 0.1429 | 0.0038 | 0.5551 | 2.05 |
| 922.148  | 0    | 0.0000 | 1.0000 | 0.3656 | 2.09 |
| 922.148  | 0.2  | 0.1359 | 0.0050 | 0.1693 | 2.01 |
| 922.148  | 0.4  | 0.5954 | 0.0000 | 0.0668 | 1.83 |
| 925.0941 | -0.4 | 0.3837 | 0.0000 | 0.3787 | 2.06 |
| 925.0941 | -0.2 | 0.0898 | 0.0303 | 0.3773 | 2.09 |
| 925.0941 | 0    | 0.0000 | 1.0000 | 0.3656 | 2.09 |
| 925.0941 | 0.2  | 0.0892 | 0.0311 | 0.3464 | 2.08 |
| 925.0941 | 0.4  | 0.3781 | 0.0000 | 0.3260 | 2.04 |
| 932.6202 | -0.4 | 0.5069 | 0.0000 | 0.3730 | 2.03 |
| 932.6202 | -0.2 | 0.1209 | 0.0090 | 0.3839 | 2.08 |
| 932.6202 | 0    | 0.0000 | 1.0000 | 0.3656 | 2.09 |
| 932.6202 | 0.2  | 0.1180 | 0.0101 | 0.3304 | 2.07 |
| 932.6202 | 0.4  | 0.4842 | 0.0000 | 0.2994 | 2.00 |
| 934.0143 | -0.4 | 0.4469 | 0.0000 | 0.4717 | 2.07 |
| 934.0143 | -0.2 | 0.1092 | 0.0143 | 0.4261 | 2.09 |
| 934.0143 | 0    | 0.0000 | 1.0000 | 0.3656 | 2.09 |
| 934.0143 | 0.2  | 0.1089 | 0.0144 | 0.2986 | 2.09 |



|          |      |        |        |        |      |
|----------|------|--------|--------|--------|------|
| 934.0143 | 0.4  | 0.4438 | 0.0000 | 0.2322 | 2.07 |
| 934.7225 | -0.4 | 0.4038 | 0.0000 | 0.3374 | 2.09 |
| 934.7225 | -0.2 | 0.0977 | 0.0223 | 0.3514 | 2.09 |
| 934.7225 | 0    | 0.0000 | 1.0000 | 0.3656 | 2.09 |
| 934.7225 | 0.2  | 0.0976 | 0.0224 | 0.3795 | 2.10 |
| 934.7225 | 0.4  | 0.4037 | 0.0000 | 0.3932 | 2.10 |
| 935.4578 | -0.4 | 0.3733 | 0.0000 | 0.6055 | 2.08 |
| 935.4578 | -0.2 | 0.0898 | 0.0304 | 0.4748 | 2.09 |
| 935.4578 | 0    | 0.0000 | 1.0000 | 0.3656 | 2.09 |
| 935.4578 | 0.2  | 0.0900 | 0.0301 | 0.2690 | 2.09 |
| 935.4578 | 0.4  | 0.3747 | 0.0000 | 0.1823 | 2.07 |
| 936.5461 | -0.4 | 0.5897 | 0.0000 | 0.2863 | 1.99 |
| 936.5461 | -0.2 | 0.1444 | 0.0036 | 0.3233 | 2.06 |
| 936.5461 | 0    | 0.0000 | 1.0000 | 0.3656 | 2.09 |
| 936.5461 | 0.2  | 0.1460 | 0.0034 | 0.3848 | 2.07 |
| 936.5461 | 0.4  | 0.6005 | 0.0000 | 0.3646 | 2.01 |
| 950.7635 | -0.4 | 0.3846 | 0.0000 | 0.3716 | 2.09 |
| 950.7635 | -0.2 | 0.0894 | 0.0309 | 0.3678 | 2.09 |
| 950.7635 | 0    | 0.0000 | 1.0000 | 0.3656 | 2.09 |
| 950.7635 | 0.2  | 0.0898 | 0.0303 | 0.3648 | 2.10 |
| 950.7635 | 0.4  | 0.3873 | 0.0000 | 0.3653 | 2.10 |
| 954.9507 | -0.4 | 0.3886 | 0.0000 | 0.4411 | 2.10 |
| 954.9507 | -0.2 | 0.0905 | 0.0295 | 0.4021 | 2.09 |
| 954.9507 | 0    | 0.0000 | 1.0000 | 0.3656 | 2.09 |
| 954.9507 | 0.2  | 0.0907 | 0.0293 | 0.3311 | 2.09 |
| 954.9507 | 0.4  | 0.3908 | 0.0000 | 0.2965 | 2.10 |
| 960.577  | -0.4 | 0.3949 | 0.0000 | 0.7384 | 2.09 |
| 960.577  | -0.2 | 0.0913 | 0.0286 | 0.5288 | 2.09 |
| 960.577  | 0    | 0.0000 | 1.0000 | 0.3656 | 2.09 |
| 960.577  | 0.2  | 0.0914 | 0.0285 | 0.2344 | 2.09 |
| 960.577  | 0.4  | 0.3952 | 0.0000 | 0.1285 | 2.09 |
| 964.7843 | -0.4 | 0.4019 | 0.0000 | 0.4785 | 2.09 |
| 964.7843 | -0.2 | 0.0930 | 0.0268 | 0.4176 | 2.09 |
| 964.7843 | 0    | 0.0000 | 1.0000 | 0.3656 | 2.09 |
| 964.7843 | 0.2  | 0.0927 | 0.0271 | 0.3159 | 2.09 |
| 964.7843 | 0.4  | 0.4006 | 0.0000 | 0.2632 | 2.08 |

|          |      |        |        |        |      |
|----------|------|--------|--------|--------|------|
| 976.8776 | -0.4 | 0.5260 | 0.0000 | 0.3988 | 2.09 |
| 976.8776 | -0.2 | 0.1289 | 0.0066 | 0.3824 | 2.09 |
| 976.8776 | 0    | 0.0000 | 1.0000 | 0.3656 | 2.09 |
| 976.8776 | 0.2  | 0.1286 | 0.0067 | 0.3486 | 2.09 |
| 976.8776 | 0.4  | 0.5248 | 0.0000 | 0.3314 | 2.10 |
| 977.0116 | -0.4 | 0.5357 | 0.0000 | 0.3464 | 2.10 |
| 977.0116 | -0.2 | 0.1315 | 0.0060 | 0.3562 | 2.10 |
| 977.0116 | 0    | 0.0000 | 1.0000 | 0.3656 | 2.09 |
| 977.0116 | 0.2  | 0.1316 | 0.0060 | 0.3754 | 2.09 |
| 977.0116 | 0.4  | 0.5361 | 0.0000 | 0.3864 | 2.09 |
| 981.7859 | -0.4 | 0.4173 | 0.0000 | 0.3579 | 2.10 |
| 981.7859 | -0.2 | 0.0993 | 0.0209 | 0.3619 | 2.09 |
| 981.7859 | 0    | 0.0000 | 1.0000 | 0.3656 | 2.09 |
| 981.7859 | 0.2  | 0.0994 | 0.0209 | 0.3684 | 2.09 |
| 981.7859 | 0.4  | 0.4175 | 0.0000 | 0.3703 | 2.09 |
| 982.3613 | -0.4 | 0.4107 | 0.0000 | 0.3510 | 2.09 |
| 982.3613 | -0.2 | 0.0975 | 0.0225 | 0.3599 | 2.09 |
| 982.3613 | 0    | 0.0000 | 1.0000 | 0.3656 | 2.09 |
| 982.3613 | 0.2  | 0.0975 | 0.0225 | 0.3708 | 2.09 |
| 982.3613 | 0.4  | 0.4106 | 0.0000 | 0.3749 | 2.10 |
| 986.8844 | -0.2 | 0.3198 | 0.0000 | 0.4150 | 2.08 |
| 986.8844 | 0    | 0.0000 | 1.0000 | 0.3656 | 2.09 |
| 986.8844 | 0.2  | 0.3216 | 0.0000 | 0.3139 | 2.09 |
| 996.3128 | -0.2 | 0.3685 | 0.0000 | 0.3520 | 2.07 |
| 996.3128 | 0    | 0.0000 | 1.0000 | 0.3656 | 2.09 |
| 996.3128 | 0.2  | 0.3634 | 0.0000 | 0.3628 | 2.10 |
| 1004.564 | -0.2 | 0.2264 | 0.0001 | 0.4121 | 2.04 |
| 1004.564 | 0    | 0.0000 | 1.0000 | 0.3656 | 2.09 |
| 1004.564 | 0.2  | 0.2230 | 0.0002 | 0.3309 | 2.13 |
| 1022.167 | -0.2 | 0.5486 | 0.0000 | 0.3226 | 2.09 |
| 1022.167 | 0    | 0.0000 | 1.0000 | 0.3656 | 2.09 |
| 1022.167 | 0.2  | 0.5496 | 0.0000 | 0.4097 | 2.09 |
| 1025.942 | -0.2 | 0.4595 | 0.0000 | 0.4062 | 2.07 |
| 1025.942 | 0    | 0.0000 | 1.0000 | 0.3656 | 2.09 |
| 1025.942 | 0.2  | 0.4572 | 0.0000 | 0.3293 | 2.12 |
| 1052.202 | -0.2 | 0.2814 | 0.0000 | 0.3501 | 2.03 |

|          |      |        |        |        |      |
|----------|------|--------|--------|--------|------|
| 1052.202 | 0    | 0.0000 | 1.0000 | 0.3656 | 2.09 |
| 1052.202 | 0.2  | 0.2823 | 0.0000 | 0.3750 | 2.14 |
| 1056.346 | -0.4 | 0.6587 | 0.0000 | 0.3829 | 2.08 |
| 1056.346 | -0.2 | 0.1692 | 0.0014 | 0.3742 | 2.09 |
| 1056.346 | 0    | 0.0000 | 1.0000 | 0.3656 | 2.09 |
| 1056.346 | 0.2  | 0.1818 | 0.0008 | 0.3566 | 2.10 |
| 1056.346 | 0.4  | 0.7602 | 0.0000 | 0.3471 | 2.11 |
| 1056.747 | -0.4 | 0.7600 | 0.0000 | 0.3687 | 2.11 |
| 1056.747 | -0.2 | 0.1828 | 0.0008 | 0.3674 | 2.10 |
| 1056.747 | 0    | 0.0000 | 1.0000 | 0.3656 | 2.09 |
| 1056.747 | 0.2  | 0.1717 | 0.0013 | 0.3633 | 2.08 |
| 1056.747 | 0.4  | 0.6707 | 0.0000 | 0.3607 | 2.07 |
| 1084.477 | -0.2 | 0.3267 | 0.0000 | 0.4881 | 2.01 |
| 1084.477 | 0    | 0.0000 | 1.0000 | 0.3656 | 2.09 |
| 1084.477 | 0.2  | 0.3140 | 0.0000 | 0.2179 | 2.11 |
| 1121.816 | -0.2 | 0.2057 | 0.0003 | 0.2896 | 2.10 |
| 1121.816 | 0    | 0.0000 | 1.0000 | 0.3656 | 2.09 |
| 1121.816 | 0.2  | 0.2040 | 0.0004 | 0.4449 | 2.08 |
| 1126.495 | -0.4 | 0.7961 | 0.0000 | 0.3728 | 2.09 |
| 1126.495 | -0.2 | 0.1980 | 0.0004 | 0.3709 | 2.09 |
| 1126.495 | 0    | 0.0000 | 1.0000 | 0.3656 | 2.09 |
| 1126.495 | 0.2  | 0.1976 | 0.0005 | 0.3577 | 2.10 |
| 1126.495 | 0.4  | 0.7926 | 0.0000 | 0.3481 | 2.10 |
| 1138.217 | -0.4 | 0.7248 | 0.0000 | 0.1978 | 2.10 |
| 1138.217 | -0.2 | 0.1803 | 0.0009 | 0.2760 | 2.10 |
| 1138.217 | 0    | 0.0000 | 1.0000 | 0.3656 | 2.09 |
| 1138.217 | 0.2  | 0.1803 | 0.0009 | 0.4628 | 2.07 |
| 1138.217 | 0.4  | 0.7238 | 0.0000 | 0.5633 | 2.05 |
| 1151.379 | -0.4 | 0.7622 | 0.0000 | 0.3112 | 2.10 |
| 1151.379 | -0.2 | 0.1896 | 0.0006 | 0.3393 | 2.10 |
| 1151.379 | 0    | 0.0000 | 1.0000 | 0.3656 | 2.09 |
| 1151.379 | 0.2  | 0.1902 | 0.0006 | 0.3900 | 2.09 |
| 1151.379 | 0.4  | 0.7672 | 0.0000 | 0.4122 | 2.08 |
| 1153.292 | -0.4 | 0.6326 | 0.0000 | 0.4102 | 2.08 |
| 1153.292 | -0.2 | 0.1571 | 0.0022 | 0.3910 | 2.09 |
| 1153.292 | 0    | 0.0000 | 1.0000 | 0.3656 | 2.09 |

|          |      |        |        |        |      |
|----------|------|--------|--------|--------|------|
| 1153.292 | 0.2  | 0.1585 | 0.0021 | 0.3344 | 2.09 |
| 1153.292 | 0.4  | 0.6460 | 0.0000 | 0.2990 | 2.09 |
| 1155.943 | -0.4 | 0.7159 | 0.0000 | 0.2652 | 2.04 |
| 1155.943 | -0.2 | 0.1784 | 0.0010 | 0.3162 | 2.07 |
| 1155.943 | 0    | 0.0000 | 1.0000 | 0.3656 | 2.09 |
| 1155.943 | 0.2  | 0.1802 | 0.0009 | 0.4102 | 2.10 |
| 1155.943 | 0.4  | 0.7291 | 0.0000 | 0.4472 | 2.11 |
| 1163.607 | -0.4 | 0.6453 | 0.0000 | 0.3646 | 2.05 |
| 1163.607 | -0.2 | 0.1596 | 0.0020 | 0.3668 | 2.07 |
| 1163.607 | 0    | 0.0000 | 1.0000 | 0.3656 | 2.09 |
| 1163.607 | 0.2  | 0.1597 | 0.0020 | 0.3604 | 2.11 |
| 1163.607 | 0.4  | 0.6465 | 0.0000 | 0.3507 | 2.11 |
| 1169.871 | -0.4 | 0.4756 | 0.0000 | 0.3490 | 2.09 |
| 1169.871 | -0.2 | 0.1155 | 0.0111 | 0.3575 | 2.09 |
| 1169.871 | 0    | 0.0000 | 1.0000 | 0.3656 | 2.09 |
| 1169.871 | 0.2  | 0.1154 | 0.0112 | 0.3737 | 2.09 |
| 1169.871 | 0.4  | 0.4749 | 0.0000 | 0.3810 | 2.09 |
| 1170.736 | -0.4 | 0.4757 | 0.0000 | 0.3693 | 2.10 |
| 1170.736 | -0.2 | 0.1157 | 0.0111 | 0.3680 | 2.09 |
| 1170.736 | 0    | 0.0000 | 1.0000 | 0.3656 | 2.09 |
| 1170.736 | 0.2  | 0.1157 | 0.0111 | 0.3631 | 2.09 |
| 1170.736 | 0.4  | 0.4760 | 0.0000 | 0.3603 | 2.09 |
| 1175.935 | -0.4 | 0.6147 | 0.0000 | 0.2979 | 2.17 |
| 1175.935 | -0.2 | 0.1508 | 0.0028 | 0.3324 | 2.13 |
| 1175.935 | 0    | 0.0000 | 1.0000 | 0.3656 | 2.09 |
| 1175.935 | 0.2  | 0.1478 | 0.0032 | 0.3970 | 2.05 |
| 1175.935 | 0.4  | 0.5900 | 0.0000 | 0.4271 | 2.00 |
| 1179.735 | -0.4 | 0.7791 | 0.0000 | 0.3454 | 2.22 |
| 1179.735 | -0.2 | 0.1937 | 0.0005 | 0.3571 | 2.16 |
| 1179.735 | 0    | 0.0000 | 1.0000 | 0.3656 | 2.09 |
| 1179.735 | 0.2  | 0.1944 | 0.0005 | 0.3734 | 2.03 |
| 1179.735 | 0.4  | 0.7835 | 0.0000 | 0.3805 | 1.96 |
| 1181.69  | -0.4 | 0.6403 | 0.0000 | 0.3569 | 2.04 |
| 1181.69  | -0.2 | 0.1599 | 0.0020 | 0.3613 | 2.07 |
| 1181.69  | 0    | 0.0000 | 1.0000 | 0.3656 | 2.09 |
| 1181.69  | 0.2  | 0.1608 | 0.0019 | 0.3697 | 2.12 |

|          |      |        |        |        |      |
|----------|------|--------|--------|--------|------|
| 1181.69  | 0.4  | 0.6490 | 0.0000 | 0.3745 | 2.14 |
| 1189.451 | -0.4 | 0.5119 | 0.0000 | 0.3805 | 2.09 |
| 1189.451 | -0.2 | 0.1262 | 0.0074 | 0.3734 | 2.09 |
| 1189.451 | 0    | 0.0000 | 1.0000 | 0.3656 | 2.09 |
| 1189.451 | 0.2  | 0.1264 | 0.0073 | 0.3578 | 2.10 |
| 1189.451 | 0.4  | 0.5131 | 0.0000 | 0.3497 | 2.10 |
| 1190.606 | -0.4 | 0.5134 | 0.0000 | 0.3525 | 2.09 |
| 1190.606 | -0.2 | 0.1265 | 0.0073 | 0.3591 | 2.09 |
| 1190.606 | 0    | 0.0000 | 1.0000 | 0.3656 | 2.09 |
| 1190.606 | 0.2  | 0.1264 | 0.0073 | 0.3722 | 2.09 |
| 1190.606 | 0.4  | 0.5127 | 0.0000 | 0.3781 | 2.09 |
| 1204.537 | -0.2 | 0.2271 | 0.0001 | 0.4317 | 2.11 |
| 1204.537 | 0    | 0.0000 | 1.0000 | 0.3656 | 2.09 |
| 1204.537 | 0.2  | 0.2264 | 0.0001 | 0.3028 | 2.07 |
| 1208.847 | -0.2 | 0.2081 | 0.0003 | 0.3554 | 2.13 |
| 1208.847 | 0    | 0.0000 | 1.0000 | 0.3656 | 2.09 |
| 1208.847 | 0.2  | 0.2067 | 0.0003 | 0.3714 | 2.05 |
| 1209.976 | -0.2 | 0.2314 | 0.0001 | 0.3844 | 2.11 |
| 1209.976 | 0    | 0.0000 | 1.0000 | 0.3656 | 2.09 |
| 1209.976 | 0.2  | 0.2291 | 0.0001 | 0.3481 | 2.08 |
| 1214.444 | -0.4 | 0.7366 | 0.0000 | 0.5627 | 2.09 |
| 1214.444 | -0.2 | 0.1835 | 0.0008 | 0.4609 | 2.10 |
| 1214.444 | 0    | 0.0000 | 1.0000 | 0.3656 | 2.09 |
| 1214.444 | 0.2  | 0.1865 | 0.0007 | 0.2811 | 2.08 |
| 1214.444 | 0.4  | 0.7633 | 0.0000 | 0.2100 | 2.06 |
| 1221.307 | -0.4 | 0.7845 | 0.0000 | 0.3790 | 1.96 |
| 1221.307 | -0.2 | 0.1940 | 0.0005 | 0.3770 | 2.03 |
| 1221.307 | 0    | 0.0000 | 1.0000 | 0.3656 | 2.09 |
| 1221.307 | 0.2  | 0.1928 | 0.0006 | 0.3431 | 2.16 |
| 1221.307 | 0.4  | 0.7754 | 0.0000 | 0.3073 | 2.22 |
| 1234.604 | -0.4 | 0.7844 | 0.0000 | 0.3559 | 2.11 |
| 1234.604 | -0.2 | 0.1934 | 0.0005 | 0.3614 | 2.10 |
| 1234.604 | 0    | 0.0000 | 1.0000 | 0.3656 | 2.09 |
| 1234.604 | 0.2  | 0.1932 | 0.0005 | 0.3683 | 2.09 |
| 1234.604 | 0.4  | 0.7823 | 0.0000 | 0.3700 | 2.08 |
| 1235.476 | -0.2 | 0.2034 | 0.0004 | 0.3504 | 2.13 |

|          |      |        |        |        |      |
|----------|------|--------|--------|--------|------|
| 1235.476 | 0    | 0.0000 | 1.0000 | 0.3656 | 2.09 |
| 1235.476 | 0.2  | 0.2039 | 0.0004 | 0.3777 | 2.06 |
| 1235.582 | -0.2 | 0.2008 | 0.0004 | 0.3778 | 2.04 |
| 1235.582 | 0    | 0.0000 | 1.0000 | 0.3656 | 2.09 |
| 1235.582 | 0.2  | 0.2019 | 0.0004 | 0.3489 | 2.15 |
| 1249.746 | -0.2 | 0.2137 | 0.0002 | 0.3267 | 2.10 |
| 1249.746 | 0    | 0.0000 | 1.0000 | 0.3656 | 2.09 |
| 1249.746 | 0.2  | 0.2126 | 0.0003 | 0.3929 | 2.08 |
| 1251.696 | -0.2 | 0.2324 | 0.0001 | 0.3711 | 2.12 |
| 1251.696 | 0    | 0.0000 | 1.0000 | 0.3656 | 2.09 |
| 1251.696 | 0.2  | 0.2277 | 0.0001 | 0.3670 | 2.07 |
| 1253.75  | -0.2 | 0.2149 | 0.0002 | 0.3516 | 2.05 |
| 1253.75  | 0    | 0.0000 | 1.0000 | 0.3656 | 2.09 |
| 1253.75  | 0.2  | 0.2170 | 0.0002 | 0.3711 | 2.13 |
| 1267.243 | -0.2 | 0.2827 | 0.0000 | 0.3111 | 2.17 |
| 1267.243 | 0    | 0.0000 | 1.0000 | 0.3656 | 2.09 |
| 1267.243 | 0.2  | 0.2794 | 0.0000 | 0.4196 | 2.03 |
| 1271.724 | -0.2 | 0.2981 | 0.0000 | 0.4169 | 2.09 |
| 1271.724 | 0    | 0.0000 | 1.0000 | 0.3656 | 2.09 |
| 1271.724 | 0.2  | 0.3019 | 0.0000 | 0.3147 | 2.10 |
| 1288.886 | -0.2 | 0.4192 | 0.0000 | 0.3631 | 2.03 |
| 1288.886 | 0    | 0.0000 | 1.0000 | 0.3656 | 2.09 |
| 1288.886 | 0.2  | 0.4264 | 0.0000 | 0.3797 | 2.14 |
| 1300.268 | -0.2 | 0.6018 | 0.0000 | 0.3504 | 2.08 |
| 1300.268 | 0    | 0.0000 | 1.0000 | 0.3656 | 2.09 |
| 1300.268 | 0.2  | 0.5501 | 0.0000 | 0.2895 | 2.07 |
| 1311.182 | -0.2 | 0.3162 | 0.0000 | 0.3504 | 2.06 |
| 1311.182 | 0    | 0.0000 | 1.0000 | 0.3656 | 2.09 |
| 1311.182 | 0.2  | 0.3097 | 0.0000 | 0.3625 | 2.12 |
| 1320.311 | -0.2 | 0.2971 | 0.0000 | 0.3205 | 2.00 |
| 1320.311 | 0    | 0.0000 | 1.0000 | 0.3656 | 2.09 |
| 1320.311 | 0.2  | 0.2976 | 0.0000 | 0.4159 | 2.17 |
| 1323.786 | -0.2 | 0.3816 | 0.0000 | 0.4301 | 2.21 |
| 1323.786 | 0    | 0.0000 | 1.0000 | 0.3656 | 2.09 |
| 1323.786 | 0.2  | 0.3885 | 0.0000 | 0.2943 | 1.94 |
| 1332.014 | -0.2 | 0.2782 | 0.0000 | 0.3919 | 2.12 |

|          |      |        |        |        |      |
|----------|------|--------|--------|--------|------|
| 1332.014 | 0    | 0.0000 | 1.0000 | 0.3656 | 2.09 |
| 1332.014 | 0.2  | 0.2798 | 0.0000 | 0.3343 | 2.06 |
| 1339.167 | -0.2 | 0.2265 | 0.0001 | 0.3653 | 2.10 |
| 1339.167 | 0    | 0.0000 | 1.0000 | 0.3656 | 2.09 |
| 1339.167 | 0.2  | 0.2253 | 0.0002 | 0.3649 | 2.09 |
| 1340.483 | -0.2 | 0.2295 | 0.0001 | 0.3762 | 2.09 |
| 1340.483 | 0    | 0.0000 | 1.0000 | 0.3656 | 2.09 |
| 1340.483 | 0.2  | 0.2308 | 0.0001 | 0.3547 | 2.10 |
| 1345.418 | -0.2 | 0.5185 | 0.0000 | 0.2850 | 1.95 |
| 1345.418 | 0    | 0.0000 | 1.0000 | 0.3656 | 2.09 |
| 1345.418 | 0.2  | 0.5170 | 0.0000 | 0.4559 | 2.22 |
| 1352.983 | -0.2 | 0.6835 | 0.0000 | 0.3178 | 2.08 |
| 1352.983 | 0    | 0.0000 | 1.0000 | 0.3656 | 2.09 |
| 1352.983 | 0.2  | 0.6938 | 0.0000 | 0.3946 | 2.10 |
| 1359.558 | -0.2 | 0.5256 | 0.0000 | 0.3006 | 2.05 |
| 1359.558 | 0    | 0.0000 | 1.0000 | 0.3656 | 2.09 |
| 1359.558 | 0.2  | 0.5252 | 0.0000 | 0.4297 | 2.13 |
| 1362.486 | -0.2 | 0.8373 | 0.0000 | 0.3256 | 1.95 |
| 1362.486 | 0    | 0.0000 | 1.0000 | 0.3656 | 2.09 |
| 1362.486 | 0.2  | 0.8536 | 0.0000 | 0.3458 | 2.17 |
| 1369.736 | -0.2 | 0.5840 | 0.0000 | 0.3617 | 2.08 |
| 1369.736 | 0    | 0.0000 | 1.0000 | 0.3656 | 2.09 |
| 1369.736 | 0.2  | 0.5994 | 0.0000 | 0.3454 | 2.08 |
| 1387.139 | -0.2 | 0.5996 | 0.0000 | 0.3552 | 2.09 |
| 1387.139 | 0    | 0.0000 | 1.0000 | 0.3656 | 2.09 |
| 1387.139 | 0.2  | 0.6003 | 0.0000 | 0.3725 | 2.10 |
| 1393.307 | -0.2 | 0.7278 | 0.0000 | 0.4248 | 2.12 |
| 1393.307 | 0    | 0.0000 | 1.0000 | 0.3656 | 2.09 |
| 1393.307 | 0.2  | 0.7552 | 0.0000 | 0.2907 | 2.07 |
| 1396.568 | -0.2 | 0.9558 | 0.0000 | 0.3795 | 1.97 |
| 1396.568 | 0    | 0.0000 | 1.0000 | 0.3656 | 2.09 |
| 1396.568 | 0.2  | 0.9146 | 0.0000 | 0.3486 | 2.26 |
| 1406.804 | -0.2 | 0.7973 | 0.0000 | 0.3617 | 2.28 |
| 1406.804 | 0    | 0.0000 | 1.0000 | 0.3656 | 2.09 |
| 1406.804 | 0.2  | 0.7438 | 0.0000 | 0.2958 | 1.87 |
| 1423.607 | -0.2 | 0.4835 | 0.0000 | 0.3013 | 2.11 |

|          |      |        |        |        |      |
|----------|------|--------|--------|--------|------|
| 1423.607 | 0    | 0.0000 | 1.0000 | 0.3656 | 2.09 |
| 1423.607 | 0.2  | 0.4949 | 0.0000 | 0.4444 | 2.08 |
| 1435.198 | -0.2 | 0.6356 | 0.0000 | 0.4048 | 2.16 |
| 1435.198 | 0    | 0.0000 | 1.0000 | 0.3656 | 2.09 |
| 1435.198 | 0.2  | 0.6664 | 0.0000 | 0.3094 | 2.04 |
| 1446.406 | -0.2 | 0.3919 | 0.0000 | 0.3169 | 2.12 |
| 1446.406 | 0    | 0.0000 | 1.0000 | 0.3656 | 2.09 |
| 1446.406 | 0.2  | 0.4027 | 0.0000 | 0.4335 | 2.07 |
| 1456.274 | -0.2 | 0.2984 | 0.0000 | 0.3247 | 2.11 |
| 1456.274 | 0    | 0.0000 | 1.0000 | 0.3656 | 2.09 |
| 1456.274 | 0.2  | 0.2963 | 0.0000 | 0.4107 | 2.08 |
| 1468.977 | -0.2 | 0.4469 | 0.0000 | 0.3618 | 2.11 |
| 1468.977 | 0    | 0.0000 | 1.0000 | 0.3656 | 2.09 |
| 1468.977 | 0.2  | 0.4459 | 0.0000 | 0.3731 | 2.08 |
| 1477.087 | -0.2 | 0.4618 | 0.0000 | 0.3933 | 2.07 |
| 1477.087 | 0    | 0.0000 | 1.0000 | 0.3656 | 2.09 |
| 1477.087 | 0.2  | 0.4660 | 0.0000 | 0.3464 | 2.11 |
| 1478.967 | -0.4 | 0.7464 | 0.0000 | 0.3750 | 2.09 |
| 1478.967 | -0.2 | 0.1894 | 0.0006 | 0.3705 | 2.09 |
| 1478.967 | 0    | 0.0000 | 1.0000 | 0.3656 | 2.09 |
| 1478.967 | 0.2  | 0.1966 | 0.0005 | 0.3612 | 2.09 |
| 1478.967 | 0.4  | 0.7958 | 0.0000 | 0.3583 | 2.09 |
| 1479.476 | -0.2 | 0.2064 | 0.0003 | 0.3636 | 2.09 |
| 1479.476 | 0    | 0.0000 | 1.0000 | 0.3656 | 2.09 |
| 1479.476 | 0.2  | 0.2129 | 0.0003 | 0.3683 | 2.09 |
| 1482.06  | -0.2 | 0.5438 | 0.0000 | 0.3510 | 2.09 |
| 1482.06  | 0    | 0.0000 | 1.0000 | 0.3656 | 2.09 |
| 1482.06  | 0.2  | 0.5594 | 0.0000 | 0.3900 | 2.09 |
| 1493.435 | -0.2 | 0.9366 | 0.0000 | 0.3140 | 2.06 |
| 1493.435 | 0    | 0.0000 | 1.0000 | 0.3656 | 2.09 |
| 1493.435 | 0.2  | 0.9318 | 0.0000 | 0.3948 | 2.19 |
| 1498.837 | -0.2 | 0.3833 | 0.0000 | 0.3560 | 2.10 |
| 1498.837 | 0    | 0.0000 | 1.0000 | 0.3656 | 2.09 |
| 1498.837 | 0.2  | 0.3832 | 0.0000 | 0.3788 | 2.09 |
| 1501.177 | -0.2 | 0.3934 | 0.0000 | 0.4021 | 2.10 |
| 1501.177 | 0    | 0.0000 | 1.0000 | 0.3656 | 2.09 |



|          |      |        |        |        |      |
|----------|------|--------|--------|--------|------|
| 1501.177 | 0.2  | 0.3936 | 0.0000 | 0.3324 | 2.08 |
| 1508.527 | -0.2 | 0.5572 | 0.0000 | 0.3780 | 2.20 |
| 1508.527 | 0    | 0.0000 | 1.0000 | 0.3656 | 2.09 |
| 1508.527 | 0.2  | 0.5699 | 0.0000 | 0.3306 | 1.99 |
| 1513.84  | -0.2 | 0.4371 | 0.0000 | 0.3702 | 2.09 |
| 1513.84  | 0    | 0.0000 | 1.0000 | 0.3656 | 2.09 |
| 1513.84  | 0.2  | 0.4359 | 0.0000 | 0.3643 | 2.09 |
| 1515.861 | -0.2 | 0.4653 | 0.0000 | 0.3855 | 2.12 |
| 1515.861 | 0    | 0.0000 | 1.0000 | 0.3656 | 2.09 |
| 1515.861 | 0.2  | 0.4673 | 0.0000 | 0.3464 | 2.07 |
| 1519.035 | -0.2 | 0.7255 | 0.0000 | 0.4009 | 2.20 |
| 1519.035 | 0    | 0.0000 | 1.0000 | 0.3656 | 2.09 |
| 1519.035 | 0.2  | 0.7163 | 0.0000 | 0.2858 | 2.00 |
| 1526.511 | -0.2 | 0.4854 | 0.0000 | 0.3646 | 2.10 |
| 1526.511 | 0    | 0.0000 | 1.0000 | 0.3656 | 2.09 |
| 1526.511 | 0.2  | 0.4855 | 0.0000 | 0.3688 | 2.08 |
| 1528.569 | -0.2 | 0.4912 | 0.0000 | 0.4166 | 2.10 |
| 1528.569 | 0    | 0.0000 | 1.0000 | 0.3656 | 2.09 |
| 1528.569 | 0.2  | 0.4939 | 0.0000 | 0.3202 | 2.09 |
| 1529.735 | -0.2 | 1.0595 | 0.0000 | 0.4051 | 2.02 |
| 1529.735 | 0    | 0.0000 | 1.0000 | 0.3656 | 2.09 |
| 1529.735 | 0.2  | 1.0355 | 0.0000 | 0.3005 | 2.14 |
| 1537.834 | -0.2 | 0.6779 | 0.0000 | 0.2659 | 2.11 |
| 1537.834 | 0    | 0.0000 | 1.0000 | 0.3656 | 2.09 |
| 1537.834 | 0.2  | 0.6838 | 0.0000 | 0.4347 | 2.06 |
| 1571.042 | -0.2 | 1.0218 | 0.0000 | 0.2661 | 2.08 |
| 1571.042 | 0    | 0.0000 | 1.0000 | 0.3656 | 2.09 |
| 1571.042 | 0.2  | 1.1260 | 0.0000 | 0.3427 | 2.05 |
| 1587.839 | -0.2 | 0.9942 | 0.0000 | 0.3470 | 2.04 |
| 1587.839 | 0    | 0.0000 | 1.0000 | 0.3656 | 2.09 |
| 1587.839 | 0.2  | 0.9477 | 0.0000 | 0.3073 | 2.10 |
| 1601.6   | -0.2 | 1.0599 | 0.0000 | 0.3263 | 1.96 |
| 1601.6   | 0    | 0.0000 | 1.0000 | 0.3656 | 2.09 |
| 1601.6   | 0.2  | 1.0501 | 0.0000 | 0.2938 | 2.15 |
| 1609.037 | -0.2 | 1.1833 | 0.0000 | 0.4277 | 2.11 |
| 1609.037 | 0    | 0.0000 | 1.0000 | 0.3656 | 2.09 |

|          |      |        |        |        |      |
|----------|------|--------|--------|--------|------|
| 1609.037 | 0.2  | 1.1325 | 0.0000 | 0.3748 | 2.06 |
| 1615.836 | -0.2 | 1.2029 | 0.0000 | 0.4561 | 2.29 |
| 1615.836 | 0    | 0.0000 | 1.0000 | 0.3656 | 2.09 |
| 1615.836 | 0.2  | 1.2357 | 0.0000 | 0.2698 | 1.86 |
| 1619.664 | -0.2 | 1.1512 | 0.0000 | 0.3411 | 1.87 |
| 1619.664 | 0    | 0.0000 | 1.0000 | 0.3656 | 2.09 |
| 1619.664 | 0.2  | 1.1980 | 0.0000 | 0.3621 | 2.30 |
| 1630.663 | -0.2 | 1.1469 | 0.0000 | 0.3353 | 2.33 |
| 1630.663 | 0    | 0.0000 | 1.0000 | 0.3656 | 2.09 |
| 1630.663 | 0.2  | 1.2504 | 0.0000 | 0.2286 | 1.80 |
| 1636.341 | -0.2 | 1.0978 | 0.0000 | 0.3672 | 2.08 |
| 1636.341 | 0    | 0.0000 | 1.0000 | 0.3656 | 2.09 |
| 1636.341 | 0.2  | 1.2538 | 0.0000 | 0.3662 | 2.10 |
| 1636.665 | -0.2 | 1.2611 | 0.0000 | 0.3682 | 2.09 |
| 1636.665 | 0    | 0.0000 | 1.0000 | 0.3656 | 2.09 |
| 1636.665 | 0.2  | 1.1021 | 0.0000 | 0.3630 | 2.10 |
| 1644.033 | -0.2 | 1.2296 | 0.0000 | 0.3202 | 2.08 |
| 1644.033 | 0    | 0.0000 | 1.0000 | 0.3656 | 2.09 |
| 1644.033 | 0.2  | 1.2695 | 0.0000 | 0.4920 | 2.05 |
| 1649.479 | -0.2 | 1.3125 | 0.0000 | 0.3066 | 1.92 |
| 1649.479 | 0    | 0.0000 | 1.0000 | 0.3656 | 2.09 |
| 1649.479 | 0.2  | 1.2291 | 0.0000 | 0.3114 | 2.21 |
| 1662.393 | -0.2 | 1.3423 | 0.0000 | 0.3080 | 1.83 |
| 1662.393 | 0    | 0.0000 | 1.0000 | 0.3656 | 2.09 |
| 1662.393 | 0.2  | 1.3000 | 0.0000 | 0.3051 | 2.35 |
| 1663.796 | -0.2 | 1.3274 | 0.0000 | 0.3666 | 2.14 |
| 1663.796 | 0    | 0.0000 | 1.0000 | 0.3656 | 2.09 |
| 1663.796 | 0.2  | 1.3294 | 0.0000 | 0.3700 | 2.04 |
| 1666.175 | -0.2 | 1.4238 | 0.0000 | 0.3292 | 1.80 |
| 1666.175 | 0    | 0.0000 | 1.0000 | 0.3656 | 2.09 |
| 1666.175 | 0.2  | 1.3592 | 0.0000 | 0.2633 | 2.38 |
| 3039.875 | -0.2 | 0.5457 | 0.0000 | 0.3638 | 2.10 |
| 3039.875 | 0    | 0.0000 | 1.0000 | 0.3656 | 2.09 |
| 3039.875 | 0.2  | 0.9778 | 0.0000 | 0.3663 | 2.09 |
| 3039.983 | -0.2 | 0.9765 | 0.0000 | 0.3668 | 2.09 |
| 3039.983 | 0    | 0.0000 | 1.0000 | 0.3656 | 2.09 |

|          |      |        |        |        |      |
|----------|------|--------|--------|--------|------|
| 3039.983 | 0.2  | 0.5461 | 0.0000 | 0.3630 | 2.10 |
| 3067.88  | -0.2 | 0.7939 | 0.0000 | 0.3616 | 2.09 |
| 3067.88  | 0    | 0.0000 | 1.0000 | 0.3656 | 2.09 |
| 3067.88  | 0.2  | 0.8333 | 0.0000 | 0.3672 | 2.09 |
| 3068.109 | -0.2 | 0.8541 | 0.0000 | 0.3659 | 2.09 |
| 3068.109 | 0    | 0.0000 | 1.0000 | 0.3656 | 2.09 |
| 3068.109 | 0.2  | 0.7742 | 0.0000 | 0.3632 | 2.09 |
| 3172.943 | -0.2 | 0.8183 | 0.0000 | 0.3691 | 2.09 |
| 3172.943 | 0    | 0.0000 | 1.0000 | 0.3656 | 2.09 |
| 3172.943 | 0.2  | 0.8323 | 0.0000 | 0.3638 | 2.09 |
| 3173.405 | -0.2 | 0.8696 | 0.0000 | 0.3651 | 2.09 |
| 3173.405 | 0    | 0.0000 | 1.0000 | 0.3656 | 2.09 |
| 3173.405 | 0.2  | 0.7925 | 0.0000 | 0.3684 | 2.09 |
| 3175.413 | -0.2 | 0.8046 | 0.0000 | 0.3660 | 2.09 |
| 3175.413 | 0    | 0.0000 | 1.0000 | 0.3656 | 2.09 |
| 3175.413 | 0.2  | 0.8364 | 0.0000 | 0.3653 | 2.10 |
| 3176.592 | -0.2 | 0.8922 | 0.0000 | 0.3676 | 2.10 |
| 3176.592 | 0    | 0.0000 | 1.0000 | 0.3656 | 2.09 |
| 3176.592 | 0.2  | 0.7564 | 0.0000 | 0.3653 | 2.09 |
| 3179.389 | -0.2 | 0.8842 | 0.0000 | 0.3668 | 2.09 |
| 3179.389 | 0    | 0.0000 | 1.0000 | 0.3656 | 2.09 |
| 3179.389 | 0.2  | 0.7831 | 0.0000 | 0.3632 | 2.09 |
| 3179.789 | -0.2 | 1.0746 | 0.0000 | 0.3572 | 2.10 |
| 3179.789 | 0    | 0.0000 | 1.0000 | 0.3656 | 2.09 |
| 3179.789 | 0.2  | 0.6500 | 0.0000 | 0.3764 | 2.09 |
| 3179.858 | -0.2 | 0.7607 | 0.0000 | 0.3677 | 2.09 |
| 3179.858 | 0    | 0.0000 | 1.0000 | 0.3656 | 2.09 |
| 3179.858 | 0.2  | 0.8976 | 0.0000 | 0.3626 | 2.09 |
| 3184.913 | -0.2 | 0.6941 | 0.0000 | 0.3647 | 2.09 |
| 3184.913 | 0    | 0.0000 | 1.0000 | 0.3656 | 2.09 |
| 3184.913 | 0.2  | 0.9969 | 0.0000 | 0.3657 | 2.09 |
| 3185.613 | -0.2 | 0.9821 | 0.0000 | 0.3655 | 2.09 |
| 3185.613 | 0    | 0.0000 | 1.0000 | 0.3656 | 2.09 |
| 3185.613 | 0.2  | 0.7081 | 0.0000 | 0.3649 | 2.09 |
| 3191.677 | -0.2 | 0.6300 | 0.0000 | 0.3647 | 2.10 |
| 3191.677 | 0    | 0.0000 | 1.0000 | 0.3656 | 2.09 |

|          |      |        |        |        |      |
|----------|------|--------|--------|--------|------|
| 3191.677 | 0.2  | 1.1346 | 0.0000 | 0.3626 | 2.09 |
| 3191.938 | -0.2 | 0.9353 | 0.0000 | 0.3629 | 2.09 |
| 3191.938 | 0    | 0.0000 | 1.0000 | 0.3656 | 2.09 |
| 3191.938 | 0.2  | 0.7520 | 0.0000 | 0.3685 | 2.09 |
| 3192.305 | -0.2 | 0.6149 | 0.0000 | 0.3601 | 2.10 |
| 3192.305 | 0    | 0.0000 | 1.0000 | 0.3656 | 2.09 |
| 3192.305 | 0.2  | 1.1582 | 0.0000 | 0.3709 | 2.09 |
| 3193.991 | -0.2 | 0.7155 | 0.0000 | 0.3723 | 2.09 |
| 3193.991 | 0    | 0.0000 | 1.0000 | 0.3656 | 2.09 |
| 3193.991 | 0.2  | 0.9747 | 0.0000 | 0.3592 | 2.09 |
| 3194.516 | -0.2 | 0.8922 | 0.0000 | 0.3666 | 2.09 |
| 3194.516 | 0    | 0.0000 | 1.0000 | 0.3656 | 2.09 |
| 3194.516 | 0.2  | 0.7881 | 0.0000 | 0.3658 | 2.09 |
| 3196.33  | -0.2 | 0.8227 | 0.0000 | 0.3634 | 2.09 |
| 3196.33  | 0    | 0.0000 | 1.0000 | 0.3656 | 2.09 |
| 3196.33  | 0.2  | 0.8657 | 0.0000 | 0.3673 | 2.09 |
| 3196.413 | -0.2 | 1.0192 | 0.0000 | 0.3520 | 2.09 |
| 3196.413 | 0    | 0.0000 | 1.0000 | 0.3656 | 2.09 |
| 3196.413 | 0.2  | 0.6783 | 0.0000 | 0.3800 | 2.10 |
| 3196.944 | -0.2 | 0.8709 | 0.0000 | 0.3662 | 2.09 |
| 3196.944 | 0    | 0.0000 | 1.0000 | 0.3656 | 2.09 |
| 3196.944 | 0.2  | 0.8217 | 0.0000 | 0.3640 | 2.09 |
| 3208.433 | -0.2 | 0.5650 | 0.0000 | 0.3504 | 2.10 |
| 3208.433 | 0    | 0.0000 | 1.0000 | 0.3656 | 2.09 |
| 3208.433 | 0.2  | 1.2769 | 0.0000 | 0.3951 | 2.08 |
| 3208.741 | -0.2 | 1.0602 | 0.0000 | 0.3639 | 2.09 |
| 3208.741 | 0    | 0.0000 | 1.0000 | 0.3656 | 2.09 |
| 3208.741 | 0.2  | 0.6680 | 0.0000 | 0.3667 | 2.10 |
| 3209.136 | -0.2 | 0.6603 | 0.0000 | 0.3635 | 2.10 |
| 3209.136 | 0    | 0.0000 | 1.0000 | 0.3656 | 2.09 |
| 3209.136 | 0.2  | 1.0714 | 0.0000 | 0.3659 | 2.09 |
| 3209.473 | -0.2 | 1.2706 | 0.0000 | 0.3800 | 2.09 |
| 3209.473 | 0    | 0.0000 | 1.0000 | 0.3656 | 2.09 |
| 3209.473 | 0.2  | 0.5713 | 0.0000 | 0.3443 | 2.10 |
| 3210.88  | -0.2 | 1.2901 | 0.0000 | 0.3817 | 2.09 |
| 3210.88  | 0    | 0.0000 | 1.0000 | 0.3656 | 2.09 |

|          |      |        |        |        |      |
|----------|------|--------|--------|--------|------|
| 3210.88  | 0.2  | 0.5629 | 0.0000 | 0.3386 | 2.10 |
| 3217.5   | -0.2 | 0.5909 | 0.0000 | 0.3488 | 2.09 |
| 3217.5   | 0    | 0.0000 | 1.0000 | 0.3656 | 2.09 |
| 3217.5   | 0.2  | 1.2393 | 0.0000 | 0.3771 | 2.09 |
| 3222.268 | -0.2 | 1.2596 | 0.0000 | 0.3622 | 2.09 |
| 3222.268 | 0    | 0.0000 | 1.0000 | 0.3656 | 2.09 |
| 3222.268 | 0.2  | 0.5856 | 0.0000 | 0.3708 | 2.10 |
| 3232.073 | -0.2 | 0.5734 | 0.0000 | 0.3878 | 2.09 |
| 3232.073 | 0    | 0.0000 | 1.0000 | 0.3656 | 2.09 |
| 3232.073 | 0.2  | 1.2995 | 0.0000 | 0.3513 | 2.09 |

**Table S4.** Photo-physical parameters ( $\Delta E_{Q_p}$ ,  $P_{Q_p}(\text{RT})$ ,  $E_{T_1-S_0}$ , and  $\langle T_1 | \hat{H}_{S_0} | S_0 \rangle_{Q_p}^2$ ) calculated for geometries allowed by normal-mode vibrations with frequency in  $T_1$  at RT for chromophore **S1**.  $\omega_p$  is the wavenumber of the  $p$ th normal vibrational mode in the structure optimized at  $T_1$ .  $Q_p$  is the mass weighted normal coordinates at  $T_1$ . Calculation regarding geometries was stopped when  $\Delta E_{Q_p}$  becomes larger than 0.2 eV because these geometries with  $\Delta E_{Q_p} > 0.2$  eV are hardly allowed below RT.  $E_{T_1-S_0}$  does not largely change for  $Q_p$  with  $P_{Q_p}(\text{RT}) > 0.01$  which corresponds to geometries much allowed at RT.

| $\omega_p$<br>( $\text{cm}^{-1}$ ) | $Q_p$<br>(a.u.) | $\Delta E_{Q_p}$<br>(eV) | $P_{Q_p}(\text{RT})$ | $\langle T_1   \hat{H}_{S_0}   S_0 \rangle_{Q_p}^2$<br>( $\text{cm}^{-2}$ ) | $E_{T_1-S_0}$<br>(eV) |
|------------------------------------|-----------------|--------------------------|----------------------|-----------------------------------------------------------------------------|-----------------------|
| 85.01098                           | -1              | 0.0984                   | 0.0217               | 0.0315                                                                      | 1.41                  |
| 85.01098                           | -0.8            | 0.0557                   | 0.1146               | 0.0205                                                                      | 1.44                  |
| 85.01098                           | -0.6            | 0.0281                   | 0.3354               | 0.0116                                                                      | 1.46                  |
| 85.01098                           | -0.4            | 0.0114                   | 0.6408               | 0.0052                                                                      | 1.48                  |
| 85.01098                           | -0.2            | 0.0027                   | 0.9002               | 0.0013                                                                      | 1.49                  |
| 85.01098                           | 0               | 0.0000                   | 1.0000               | 0.0000                                                                      | 1.49                  |
| 85.01098                           | 0.2             | 0.0027                   | 0.9002               | 0.0013                                                                      | 1.49                  |
| 85.01098                           | 0.4             | 0.0114                   | 0.6408               | 0.0052                                                                      | 1.48                  |

|          |      |        |        |        |      |
|----------|------|--------|--------|--------|------|
| 85.01098 | 0.6  | 0.0281 | 0.3354 | 0.0116 | 1.46 |
| 85.01098 | 0.8  | 0.0557 | 0.1146 | 0.0205 | 1.44 |
| 85.01098 | 1    | 0.0984 | 0.0217 | 0.0315 | 1.41 |
| 117.0036 | -1   | 0.1428 | 0.0039 | 0.0528 | 1.56 |
| 117.0036 | -0.8 | 0.0810 | 0.0427 | 0.0343 | 1.54 |
| 117.0036 | -0.6 | 0.0409 | 0.2035 | 0.0194 | 1.52 |
| 117.0036 | -0.4 | 0.0167 | 0.5227 | 0.0087 | 1.51 |
| 117.0036 | -0.2 | 0.0039 | 0.8579 | 0.0022 | 1.50 |
| 117.0036 | 0    | 0.0000 | 1.0000 | 0.0000 | 1.49 |
| 117.0036 | 0.2  | 0.0039 | 0.8579 | 0.0022 | 1.50 |
| 117.0036 | 0.4  | 0.0167 | 0.5227 | 0.0087 | 1.51 |
| 117.0036 | 0.6  | 0.0409 | 0.2035 | 0.0194 | 1.52 |
| 117.0036 | 0.8  | 0.0810 | 0.0427 | 0.0343 | 1.54 |
| 117.0036 | 1    | 0.1428 | 0.0039 | 0.0528 | 1.56 |
| 234.6066 | -0.8 | 0.3015 | 0.0000 | 0.0000 | 1.50 |
| 234.6066 | -0.6 | 0.1669 | 0.0015 | 0.0000 | 1.50 |
| 234.6066 | -0.4 | 0.0733 | 0.0578 | 0.0000 | 1.50 |
| 234.6066 | -0.2 | 0.0182 | 0.4929 | 0.0000 | 1.49 |
| 234.6066 | 0    | 0.0000 | 1.0000 | 0.0000 | 1.49 |
| 234.6066 | 0.2  | 0.0182 | 0.4929 | 0.0000 | 1.49 |
| 234.6066 | 0.4  | 0.0733 | 0.0578 | 0.0000 | 1.50 |
| 234.6066 | 0.6  | 0.1669 | 0.0015 | 0.0000 | 1.50 |
| 234.6066 | 0.8  | 0.3015 | 0.0000 | 0.0000 | 1.50 |
| 244.1035 | -0.6 | 0.2025 | 0.0004 | 0.0000 | 1.41 |
| 244.1035 | -0.4 | 0.0861 | 0.0350 | 0.0000 | 1.46 |
| 244.1035 | -0.2 | 0.0209 | 0.4426 | 0.0000 | 1.48 |
| 244.1035 | 0    | 0.0000 | 1.0000 | 0.0000 | 1.49 |
| 244.1035 | 0.2  | 0.0209 | 0.4426 | 0.0000 | 1.48 |
| 244.1035 | 0.4  | 0.0861 | 0.0350 | 0.0000 | 1.46 |
| 244.1035 | 0.6  | 0.2025 | 0.0004 | 0.0000 | 1.41 |
| 253.9025 | -0.8 | 0.2919 | 0.0000 | 0.0000 | 1.43 |
| 253.9025 | -0.6 | 0.1593 | 0.0020 | 0.0000 | 1.46 |
| 253.9025 | -0.4 | 0.0687 | 0.0690 | 0.0000 | 1.48 |
| 253.9025 | -0.2 | 0.0174 | 0.5073 | 0.0000 | 1.49 |
| 253.9025 | 0    | 0.0000 | 1.0000 | 0.0000 | 1.49 |
| 253.9025 | 0.2  | 0.0174 | 0.5073 | 0.0000 | 1.49 |

|          |      |        |        |        |      |
|----------|------|--------|--------|--------|------|
| 253.9025 | 0.4  | 0.0687 | 0.0690 | 0.0000 | 1.48 |
| 253.9025 | 0.6  | 0.1593 | 0.0020 | 0.0000 | 1.46 |
| 253.9025 | 0.8  | 0.2919 | 0.0000 | 0.0000 | 1.43 |
| 331.8857 | -0.6 | 0.2557 | 0.0000 | 0.0676 | 1.34 |
| 331.8857 | -0.4 | 0.1106 | 0.0135 | 0.0293 | 1.42 |
| 331.8857 | -0.2 | 0.0272 | 0.3471 | 0.0073 | 1.48 |
| 331.8857 | 0    | 0.0000 | 1.0000 | 0.0000 | 1.49 |
| 331.8857 | 0.2  | 0.0272 | 0.3471 | 0.0073 | 1.48 |
| 331.8857 | 0.4  | 0.1106 | 0.0135 | 0.0293 | 1.42 |
| 331.8857 | 0.6  | 0.2557 | 0.0000 | 0.0676 | 1.34 |
| 383.4501 | -0.4 | 0.2095 | 0.0003 | 0.0000 | 1.48 |
| 383.4501 | -0.2 | 0.0518 | 0.1329 | 0.0000 | 1.49 |
| 383.4501 | 0    | 0.0000 | 1.0000 | 0.0000 | 1.49 |
| 383.4501 | 0.2  | 0.0519 | 0.1327 | 0.0000 | 1.49 |
| 383.4501 | 0.4  | 0.2095 | 0.0003 | 0.0000 | 1.48 |
| 389.4141 | -0.4 | 0.3186 | 0.0000 | 0.0000 | 1.69 |
| 389.4141 | -0.2 | 0.0775 | 0.0489 | 0.0000 | 1.59 |
| 389.4141 | 0    | 0.0000 | 1.0000 | 0.0000 | 1.49 |
| 389.4141 | 0.2  | 0.0746 | 0.0549 | 0.0000 | 1.39 |
| 389.4141 | 0.4  | 0.2904 | 0.0000 | 0.0000 | 1.29 |
| 429.3715 | -0.6 | 0.3182 | 0.0000 | 1.2665 | 1.41 |
| 429.3715 | -0.4 | 0.1329 | 0.0057 | 0.5630 | 1.46 |
| 429.3715 | -0.2 | 0.0319 | 0.2889 | 0.1409 | 1.48 |
| 429.3715 | 0    | 0.0000 | 1.0000 | 0.0000 | 1.49 |
| 429.3715 | 0.2  | 0.0319 | 0.2889 | 0.1409 | 1.48 |
| 429.3715 | 0.4  | 0.1329 | 0.0057 | 0.5630 | 1.46 |
| 429.3715 | 0.6  | 0.3182 | 0.0000 | 1.2665 | 1.41 |
| 447.8516 | -0.4 | 0.2045 | 0.0003 | 0.0000 | 1.45 |
| 447.8516 | -0.2 | 0.0501 | 0.1425 | 0.0000 | 1.48 |
| 447.8516 | 0    | 0.0000 | 1.0000 | 0.0000 | 1.49 |
| 447.8516 | 0.2  | 0.0501 | 0.1425 | 0.0000 | 1.48 |
| 447.8516 | 0.4  | 0.2045 | 0.0003 | 0.0000 | 1.45 |
| 525.3127 | -0.4 | 0.3246 | 0.0000 | 0.0080 | 1.49 |
| 525.3127 | -0.2 | 0.0804 | 0.0437 | 0.0020 | 1.49 |
| 525.3127 | 0    | 0.0000 | 1.0000 | 0.0000 | 1.49 |
| 525.3127 | 0.2  | 0.0804 | 0.0437 | 0.0020 | 1.49 |

|          |      |        |        |        |      |
|----------|------|--------|--------|--------|------|
| 525.3127 | 0.4  | 0.3246 | 0.0000 | 0.0080 | 1.49 |
| 528.5704 | -0.4 | 0.5088 | 0.0000 | 0.0000 | 1.48 |
| 528.5704 | -0.2 | 0.1267 | 0.0072 | 0.0000 | 1.49 |
| 528.5704 | 0    | 0.0000 | 1.0000 | 0.0000 | 1.49 |
| 528.5704 | 0.2  | 0.1265 | 0.0073 | 0.0000 | 1.49 |
| 528.5704 | 0.4  | 0.5088 | 0.0000 | 0.0000 | 1.48 |
| 548.3606 | -0.4 | 0.2659 | 0.0000 | 0.0000 | 1.44 |
| 548.3606 | -0.2 | 0.0656 | 0.0777 | 0.0000 | 1.48 |
| 548.3606 | 0    | 0.0000 | 1.0000 | 0.0000 | 1.49 |
| 548.3606 | 0.2  | 0.0656 | 0.0777 | 0.0000 | 1.48 |
| 548.3606 | 0.4  | 0.2659 | 0.0000 | 0.0000 | 1.44 |
| 613.4573 | -0.4 | 0.7628 | 0.0000 | 0.0000 | 1.46 |
| 613.4573 | -0.2 | 0.1902 | 0.0006 | 0.0000 | 1.49 |
| 613.4573 | 0    | 0.0000 | 1.0000 | 0.0000 | 1.49 |
| 613.4573 | 0.2  | 0.1902 | 0.0006 | 0.0000 | 1.49 |
| 613.4573 | 0.4  | 0.7628 | 0.0000 | 0.0000 | 1.46 |
| 616.5262 | -0.4 | 0.7694 | 0.0000 | 0.0000 | 1.35 |
| 616.5262 | -0.2 | 0.1914 | 0.0006 | 0.0000 | 1.44 |
| 616.5262 | 0    | 0.0000 | 1.0000 | 0.0000 | 1.49 |
| 616.5262 | 0.2  | 0.1918 | 0.0006 | 0.0000 | 1.51 |
| 616.5262 | 0.4  | 0.7698 | 0.0000 | 0.0000 | 1.48 |
| 675.8564 | -0.4 | 0.8025 | 0.0000 | 0.0000 | 1.52 |
| 675.8564 | -0.2 | 0.1998 | 0.0004 | 0.0000 | 1.50 |
| 675.8564 | 0    | 0.0000 | 1.0000 | 0.0000 | 1.49 |
| 675.8564 | 0.2  | 0.1998 | 0.0004 | 0.0000 | 1.50 |
| 675.8564 | 0.4  | 0.8025 | 0.0000 | 0.0000 | 1.52 |
| 717.0857 | -0.4 | 0.3083 | 0.0000 | 0.0000 | 1.44 |
| 717.0857 | -0.2 | 0.0696 | 0.0666 | 0.0000 | 1.48 |
| 717.0857 | 0    | 0.0000 | 1.0000 | 0.0000 | 1.49 |
| 717.0857 | 0.2  | 0.0696 | 0.0666 | 0.0000 | 1.48 |
| 717.0857 | 0.4  | 0.3083 | 0.0000 | 0.0000 | 1.44 |
| 732.8369 | -0.6 | 0.4668 | 0.0000 | 0.0063 | 1.48 |
| 732.8369 | -0.4 | 0.1929 | 0.0005 | 0.0027 | 1.49 |
| 732.8369 | -0.2 | 0.0459 | 0.1677 | 0.0007 | 1.49 |
| 732.8369 | 0    | 0.0000 | 1.0000 | 0.0000 | 1.49 |
| 732.8369 | 0.2  | 0.0459 | 0.1677 | 0.0007 | 1.49 |



|          |      |        |        |        |      |
|----------|------|--------|--------|--------|------|
| 732.8369 | 0.4  | 0.1929 | 0.0005 | 0.0027 | 1.49 |
| 732.8369 | 0.6  | 0.4668 | 0.0000 | 0.0063 | 1.48 |
| 735.6357 | -0.4 | 0.6622 | 0.0000 | 0.0141 | 1.47 |
| 735.6357 | -0.2 | 0.1644 | 0.0017 | 0.0039 | 1.49 |
| 735.6357 | 0    | 0.0000 | 1.0000 | 0.0000 | 1.49 |
| 735.6357 | 0.2  | 0.1644 | 0.0017 | 0.0039 | 1.49 |
| 735.6357 | 0.4  | 0.6622 | 0.0000 | 0.0141 | 1.47 |
| 742.9809 | -0.4 | 0.2122 | 0.0003 | 0.0000 | 1.48 |
| 742.9809 | -0.2 | 0.0498 | 0.1439 | 0.0000 | 1.49 |
| 742.9809 | 0    | 0.0000 | 1.0000 | 0.0000 | 1.49 |
| 742.9809 | 0.2  | 0.0498 | 0.1439 | 0.0000 | 1.49 |
| 742.9809 | 0.4  | 0.2122 | 0.0003 | 0.0000 | 1.48 |
| 754.821  | -0.2 | 0.2254 | 0.0002 | 0.0000 | 1.50 |
| 754.821  | 0    | 0.0000 | 1.0000 | 0.0000 | 1.49 |
| 754.821  | 0.2  | 0.2525 | 0.0001 | 0.0000 | 1.46 |
| 779.8538 | -0.4 | 0.2991 | 0.0000 | 0.5282 | 1.43 |
| 779.8538 | -0.2 | 0.0691 | 0.0679 | 0.1289 | 1.48 |
| 779.8538 | 0    | 0.0000 | 1.0000 | 0.0000 | 1.49 |
| 779.8538 | 0.2  | 0.0691 | 0.0679 | 0.1289 | 1.48 |
| 779.8538 | 0.4  | 0.2991 | 0.0000 | 0.5282 | 1.43 |
| 781.6645 | -0.4 | 0.4153 | 0.0000 | 0.0000 | 1.44 |
| 781.6645 | -0.2 | 0.1023 | 0.0186 | 0.0000 | 1.48 |
| 781.6645 | 0    | 0.0000 | 1.0000 | 0.0000 | 1.49 |
| 781.6645 | 0.2  | 0.1023 | 0.0186 | 0.0000 | 1.48 |
| 781.6645 | 0.4  | 0.4153 | 0.0000 | 0.0000 | 1.44 |
| 829.9283 | -0.4 | 0.7527 | 0.0000 | 0.0001 | 1.46 |
| 829.9283 | -0.2 | 0.1866 | 0.0007 | 0.0000 | 1.49 |
| 829.9283 | 0    | 0.0000 | 1.0000 | 0.0000 | 1.49 |
| 829.9283 | 0.2  | 0.1866 | 0.0007 | 0.0000 | 1.49 |
| 829.9283 | 0.4  | 0.7527 | 0.0000 | 0.0001 | 1.46 |
| 862.6989 | -0.4 | 0.3374 | 0.0000 | 0.0182 | 1.49 |
| 862.6989 | -0.2 | 0.0803 | 0.0439 | 0.0041 | 1.49 |
| 862.6989 | 0    | 0.0000 | 1.0000 | 0.0000 | 1.49 |
| 862.6989 | 0.2  | 0.0803 | 0.0439 | 0.0041 | 1.49 |
| 862.6989 | 0.4  | 0.3374 | 0.0000 | 0.0182 | 1.49 |
| 878.328  | -0.4 | 0.3733 | 0.0000 | 0.0000 | 1.48 |

|          |      |        |        |        |      |
|----------|------|--------|--------|--------|------|
| 878.328  | -0.2 | 0.0912 | 0.0288 | 0.0000 | 1.49 |
| 878.328  | 0    | 0.0000 | 1.0000 | 0.0000 | 1.49 |
| 878.328  | 0.2  | 0.0912 | 0.0288 | 0.0000 | 1.49 |
| 878.328  | 0.4  | 0.3733 | 0.0000 | 0.0000 | 1.48 |
| 899.0153 | -0.4 | 0.3524 | 0.0000 | 0.0000 | 1.46 |
| 899.0153 | -0.2 | 0.0841 | 0.0378 | 0.0000 | 1.49 |
| 899.0153 | 0    | 0.0000 | 1.0000 | 0.0000 | 1.49 |
| 899.0153 | 0.2  | 0.0841 | 0.0378 | 0.0000 | 1.49 |
| 899.0153 | 0.4  | 0.3524 | 0.0000 | 0.0000 | 1.46 |
| 901.5669 | -0.2 | 0.3365 | 0.0000 | 0.0000 | 1.48 |
| 901.5669 | 0    | 0.0000 | 1.0000 | 0.0000 | 1.49 |
| 901.5669 | 0.2  | 0.3365 | 0.0000 | 0.0000 | 1.48 |
| 901.7742 | -0.4 | 0.3637 | 0.0000 | 0.3424 | 1.46 |
| 901.7742 | -0.2 | 0.0870 | 0.0339 | 0.0829 | 1.49 |
| 901.7742 | 0    | 0.0000 | 1.0000 | 0.0000 | 1.49 |
| 901.7742 | 0.2  | 0.0870 | 0.0339 | 0.0829 | 1.49 |
| 901.7742 | 0.4  | 0.3637 | 0.0000 | 0.3424 | 1.46 |
| 909.2965 | -0.2 | 0.2894 | 0.0000 | 0.0000 | 1.48 |
| 909.2965 | 0    | 0.0000 | 1.0000 | 0.0000 | 1.49 |
| 909.2965 | 0.2  | 0.2893 | 0.0000 | 0.0000 | 1.48 |
| 955.8558 | -0.4 | 0.3667 | 0.0000 | 0.0493 | 1.48 |
| 955.8558 | -0.2 | 0.0873 | 0.0334 | 0.0122 | 1.49 |
| 955.8558 | 0    | 0.0000 | 1.0000 | 0.0000 | 1.49 |
| 955.8558 | 0.2  | 0.0873 | 0.0334 | 0.0122 | 1.49 |
| 955.8558 | 0.4  | 0.3667 | 0.0000 | 0.0493 | 1.48 |
| 956.6658 | -0.4 | 0.3661 | 0.0000 | 0.0000 | 1.48 |
| 956.6658 | -0.2 | 0.0875 | 0.0332 | 0.0000 | 1.49 |
| 956.6658 | 0    | 0.0000 | 1.0000 | 0.0000 | 1.49 |
| 956.6658 | 0.2  | 0.0875 | 0.0332 | 0.0000 | 1.49 |
| 956.6658 | 0.4  | 0.3661 | 0.0000 | 0.0000 | 1.48 |
| 1048.784 | -0.4 | 0.7655 | 0.0000 | 0.0003 | 1.45 |
| 1048.784 | -0.2 | 0.1896 | 0.0006 | 0.0001 | 1.48 |
| 1048.784 | 0    | 0.0000 | 1.0000 | 0.0000 | 1.49 |
| 1048.784 | 0.2  | 0.1896 | 0.0006 | 0.0001 | 1.48 |
| 1048.784 | 0.4  | 0.7655 | 0.0000 | 0.0003 | 1.45 |
| 1050.856 | -0.2 | 0.2294 | 0.0001 | 0.0000 | 1.43 |

|          |      |        |        |        |      |
|----------|------|--------|--------|--------|------|
| 1050.856 | 0    | 0.0000 | 1.0000 | 0.0000 | 1.49 |
| 1050.856 | 0.2  | 0.2515 | 0.0001 | 0.0000 | 1.55 |
| 1092.369 | -0.4 | 0.7116 | 0.0000 | 0.0000 | 1.48 |
| 1092.369 | -0.2 | 0.1766 | 0.0010 | 0.0000 | 1.49 |
| 1092.369 | 0    | 0.0000 | 1.0000 | 0.0000 | 1.49 |
| 1092.369 | 0.2  | 0.1767 | 0.0010 | 0.0000 | 1.49 |
| 1092.369 | 0.4  | 0.7117 | 0.0000 | 0.0000 | 1.48 |
| 1126.394 | -0.4 | 0.6082 | 0.0000 | 0.0000 | 1.49 |
| 1126.394 | -0.2 | 0.1507 | 0.0028 | 0.0000 | 1.49 |
| 1126.394 | 0    | 0.0000 | 1.0000 | 0.0000 | 1.49 |
| 1126.394 | 0.2  | 0.1507 | 0.0028 | 0.0000 | 1.49 |
| 1126.394 | 0.4  | 0.6082 | 0.0000 | 0.0000 | 1.49 |
| 1163.055 | -0.4 | 0.6618 | 0.0000 | 0.0004 | 1.39 |
| 1163.055 | -0.2 | 0.1627 | 0.0018 | 0.0001 | 1.47 |
| 1163.055 | 0    | 0.0000 | 1.0000 | 0.0000 | 1.49 |
| 1163.055 | 0.2  | 0.1627 | 0.0018 | 0.0001 | 1.47 |
| 1163.055 | 0.4  | 0.6618 | 0.0000 | 0.0004 | 1.39 |
| 1190.3   | -0.4 | 0.5809 | 0.0000 | 0.0000 | 1.37 |
| 1190.3   | -0.2 | 0.1405 | 0.0042 | 0.0000 | 1.44 |
| 1190.3   | 0    | 0.0000 | 1.0000 | 0.0000 | 1.49 |
| 1190.3   | 0.2  | 0.1367 | 0.0049 | 0.0000 | 1.54 |
| 1190.3   | 0.4  | 0.5463 | 0.0000 | 0.0000 | 1.56 |
| 1195.203 | -0.4 | 0.7124 | 0.0000 | 0.0000 | 1.42 |
| 1195.203 | -0.2 | 0.1757 | 0.0011 | 0.0000 | 1.47 |
| 1195.203 | 0    | 0.0000 | 1.0000 | 0.0000 | 1.49 |
| 1195.203 | 0.2  | 0.1757 | 0.0011 | 0.0000 | 1.47 |
| 1195.203 | 0.4  | 0.7124 | 0.0000 | 0.0000 | 1.42 |
| 1213.257 | -0.4 | 0.7502 | 0.0000 | 0.0000 | 1.21 |
| 1213.257 | -0.2 | 0.1872 | 0.0007 | 0.0000 | 1.36 |
| 1213.257 | 0    | 0.0000 | 1.0000 | 0.0000 | 1.49 |
| 1213.257 | 0.2  | 0.1900 | 0.0006 | 0.0000 | 1.60 |
| 1213.257 | 0.4  | 0.7810 | 0.0000 | 0.0000 | 1.67 |
| 1213.896 | -0.4 | 0.5595 | 0.0000 | 0.0000 | 1.49 |
| 1213.896 | -0.2 | 0.1385 | 0.0046 | 0.0000 | 1.49 |
| 1213.896 | 0    | 0.0000 | 1.0000 | 0.0000 | 1.49 |
| 1213.896 | 0.2  | 0.1385 | 0.0046 | 0.0000 | 1.49 |

|          |      |        |        |        |      |
|----------|------|--------|--------|--------|------|
| 1213.896 | 0.4  | 0.5595 | 0.0000 | 0.0000 | 1.49 |
| 1257.828 | -0.2 | 0.7717 | 0.0000 | 0.0000 | 1.47 |
| 1257.828 | 0    | 0.0000 | 1.0000 | 0.0000 | 1.49 |
| 1257.828 | 0.2  | 0.7717 | 0.0000 | 0.0000 | 1.47 |
| 1273.883 | -0.2 | 0.2977 | 0.0000 | 0.0000 | 1.46 |
| 1273.883 | 0    | 0.0000 | 1.0000 | 0.0000 | 1.49 |
| 1273.883 | 0.2  | 0.2977 | 0.0000 | 0.0000 | 1.46 |
| 1290.322 | -0.2 | 0.2316 | 0.0001 | 0.0000 | 1.49 |
| 1290.322 | 0    | 0.0000 | 1.0000 | 0.0000 | 1.49 |
| 1290.322 | 0.2  | 0.2316 | 0.0001 | 0.0000 | 1.49 |
| 1314.191 | -0.2 | 0.2079 | 0.0003 | 0.0000 | 1.49 |
| 1314.191 | 0    | 0.0000 | 1.0000 | 0.0000 | 1.49 |
| 1314.191 | 0.2  | 0.2079 | 0.0003 | 0.0000 | 1.49 |
| 1419.741 | -0.2 | 1.1412 | 0.0000 | 0.0000 | 0.78 |
| 1419.741 | 0    | 0.0000 | 1.0000 | 0.0000 | 1.49 |
| 1419.741 | 0.2  | 1.0224 | 0.0000 | 0.0000 | 2.14 |
| 1422.108 | -0.2 | 0.2497 | 0.0001 | 0.0000 | 1.49 |
| 1422.108 | 0    | 0.0000 | 1.0000 | 0.0000 | 1.49 |
| 1422.108 | 0.2  | 0.2497 | 0.0001 | 0.0000 | 1.49 |
| 1468.723 | -0.2 | 0.3912 | 0.0000 | 0.0000 | 1.44 |
| 1468.723 | 0    | 0.0000 | 1.0000 | 0.0000 | 1.49 |
| 1468.723 | 0.2  | 0.3911 | 0.0000 | 0.0000 | 1.44 |
| 1479.073 | -0.2 | 0.3307 | 0.0000 | 0.0000 | 1.49 |
| 1479.073 | 0    | 0.0000 | 1.0000 | 0.0000 | 1.49 |
| 1479.073 | 0.2  | 0.3307 | 0.0000 | 0.0000 | 1.49 |
| 1490.027 | -0.2 | 0.4846 | 0.0000 | 0.0001 | 1.56 |
| 1490.027 | 0    | 0.0000 | 1.0000 | 0.0000 | 1.49 |
| 1490.027 | 0.2  | 0.4846 | 0.0000 | 0.0001 | 1.56 |
| 1499.445 | -0.2 | 0.4701 | 0.0000 | 0.0000 | 1.56 |
| 1499.445 | 0    | 0.0000 | 1.0000 | 0.0000 | 1.49 |
| 1499.445 | 0.2  | 0.4701 | 0.0000 | 0.0000 | 1.56 |
| 1530.371 | -0.2 | 0.5082 | 0.0000 | 0.0000 | 1.93 |
| 1530.371 | 0    | 0.0000 | 1.0000 | 0.0000 | 1.49 |
| 1530.371 | 0.2  | 0.5045 | 0.0000 | 0.0000 | 1.07 |
| 1534.105 | -0.2 | 0.5734 | 0.0000 | 0.0000 | 1.49 |
| 1534.105 | 0    | 0.0000 | 1.0000 | 0.0000 | 1.49 |

|          |      |        |        |        |      |
|----------|------|--------|--------|--------|------|
| 1534.105 | 0.2  | 0.5734 | 0.0000 | 0.0000 | 1.49 |
| 1578.476 | -0.2 | 0.8821 | 0.0000 | 0.0000 | 1.43 |
| 1578.476 | 0    | 0.0000 | 1.0000 | 0.0000 | 1.49 |
| 1578.476 | 0.2  | 0.8821 | 0.0000 | 0.0000 | 1.43 |
| 1603.83  | -0.2 | 0.8074 | 0.0000 | 0.0004 | 1.47 |
| 1603.83  | 0    | 0.0000 | 1.0000 | 0.0000 | 1.49 |
| 1603.83  | 0.2  | 0.8074 | 0.0000 | 0.0004 | 1.47 |
| 1629.819 | -0.2 | 1.2260 | 0.0000 | 0.0000 | 1.09 |
| 1629.819 | 0    | 0.0000 | 1.0000 | 0.0000 | 1.49 |
| 1629.819 | 0.2  | 1.0387 | 0.0000 | 0.0000 | 1.89 |
| 3178.95  | -0.2 | 0.8183 | 0.0000 | 0.0000 | 1.49 |
| 3178.95  | 0    | 0.0000 | 1.0000 | 0.0000 | 1.49 |
| 3178.95  | 0.2  | 0.8183 | 0.0000 | 0.0000 | 1.49 |
| 3179.933 | -0.2 | 0.8207 | 0.0000 | 0.0000 | 1.49 |
| 3179.933 | 0    | 0.0000 | 1.0000 | 0.0000 | 1.49 |
| 3179.933 | 0.2  | 0.8207 | 0.0000 | 0.0000 | 1.49 |
| 3180.944 | -0.2 | 0.7983 | 0.0000 | 0.0000 | 1.51 |
| 3180.944 | 0    | 0.0000 | 1.0000 | 0.0000 | 1.49 |
| 3180.944 | 0.2  | 0.8542 | 0.0000 | 0.0000 | 1.48 |
| 3183.88  | -0.2 | 0.8310 | 0.0000 | 0.0000 | 1.49 |
| 3183.88  | 0    | 0.0000 | 1.0000 | 0.0000 | 1.49 |
| 3183.88  | 0.2  | 0.8310 | 0.0000 | 0.0000 | 1.49 |
| 3184.606 | -0.2 | 0.8366 | 0.0000 | 0.0000 | 1.49 |
| 3184.606 | 0    | 0.0000 | 1.0000 | 0.0000 | 1.49 |
| 3184.606 | 0.2  | 0.8366 | 0.0000 | 0.0000 | 1.49 |
| 3187.807 | -0.2 | 0.6964 | 0.0000 | 0.0000 | 1.51 |
| 3187.807 | 0    | 0.0000 | 1.0000 | 0.0000 | 1.49 |
| 3187.807 | 0.2  | 0.9635 | 0.0000 | 0.0000 | 1.48 |
| 3196.67  | -0.2 | 0.8329 | 0.0000 | 0.0000 | 1.49 |
| 3196.67  | 0    | 0.0000 | 1.0000 | 0.0000 | 1.49 |
| 3196.67  | 0.2  | 0.8329 | 0.0000 | 0.0000 | 1.49 |
| 3197.07  | -0.2 | 0.8327 | 0.0000 | 0.0000 | 1.49 |
| 3197.07  | 0    | 0.0000 | 1.0000 | 0.0000 | 1.49 |
| 3197.07  | 0.2  | 0.8327 | 0.0000 | 0.0000 | 1.49 |
| 3211.726 | -0.2 | 0.8525 | 0.0000 | 0.0000 | 1.49 |
| 3211.726 | 0    | 0.0000 | 1.0000 | 0.0000 | 1.49 |

|          |      |        |        |        |      |
|----------|------|--------|--------|--------|------|
| 3211.726 | 0.2  | 0.8525 | 0.0000 | 0.0000 | 1.49 |
| 3212.395 | -0.2 | 1.0068 | 0.0000 | 0.0000 | 1.49 |
| 3212.395 | 0    | 0.0000 | 1.0000 | 0.0000 | 1.49 |
| 3212.395 | 0.2  | 0.6977 | 0.0000 | 0.0000 | 1.50 |

**Table S5.** Photo-physical parameters ( $\Delta E_{Q_p}$ ,  $P_{Q_p}(\text{RT})$ ,  $E_{T_1-S_0}$ , and  $\langle T_1 | \hat{H}_{\text{SO}} | S_0 \rangle_{Q_p}^2$ ) calculated for geometries allowed by normal-mode vibrations with frequency in  $T_1$  at RT for chromophore **S2**.  $\omega_p$  is the wavenumber of the  $p_{\text{th}}$  normal vibrational mode in the structure optimized at  $T_1$ .  $Q_p$  is the mass weighted normal coordinates at  $T_1$ . Calculation regarding geometries was stopped when  $\Delta E_{Q_p}$  becomes larger than 0.2 eV because these geometries with  $\Delta E_{Q_p} > 0.2$  eV are hardly allowed below RT.  $E_{T_1-S_0}$  does not largely change for  $Q_p$  with  $P_{Q_p}(\text{RT}) > 0.01$  which corresponds to geometries much allowed at RT.

| $\omega_p$<br>( $\text{cm}^{-1}$ ) | $Q_p$<br>(a.u.) | $\Delta E_{Q_p}$<br>(eV) | $P_{Q_p}(\text{RT})$ | $\langle T_1   \hat{H}_{\text{SO}}   S_0 \rangle_{Q_p}^2$<br>( $\text{cm}^{-2}$ ) | $E_{T_1-S_0}$<br>(eV) |
|------------------------------------|-----------------|--------------------------|----------------------|-----------------------------------------------------------------------------------|-----------------------|
| 106.2747                           | -0.2            | 0.2097                   | 0.0003               | 0.0000                                                                            | 1.98                  |
| 106.2747                           | 0               | 0.0000                   | 1.0000               | 0.0000                                                                            | 1.78                  |
| 106.2747                           | 0.2             | 0.2097                   | 0.0003               | 0.0000                                                                            | 1.98                  |
| 139.3663                           | -0.4            | 0.7527                   | 0.0000               | 0.0000                                                                            | 2.49                  |
| 139.3663                           | -0.2            | 0.1878                   | 0.0007               | 0.0000                                                                            | 1.96                  |
| 139.3663                           | 0               | 0.0000                   | 1.0000               | 0.0000                                                                            | 1.78                  |
| 139.3663                           | 0.2             | 0.1878                   | 0.0007               | 0.0000                                                                            | 1.96                  |
| 139.3663                           | 0.4             | 0.7527                   | 0.0000               | 0.0000                                                                            | 2.49                  |
| 207.2322                           | -0.2            | 0.2532                   | 0.0001               | 0.0000                                                                            | 2.02                  |
| 207.2322                           | 0               | 0.0000                   | 1.0000               | 0.0000                                                                            | 1.78                  |
| 207.2322                           | 0.2             | 0.2532                   | 0.0001               | 0.0000                                                                            | 2.02                  |
| 211.9115                           | -0.2            | 0.2018                   | 0.0004               | 0.0000                                                                            | 1.96                  |
| 211.9115                           | 0               | 0.0000                   | 1.0000               | 0.0000                                                                            | 1.78                  |
| 211.9115                           | 0.2             | 0.2018                   | 0.0004               | 0.0000                                                                            | 1.96                  |
| 265.3618                           | -0.2            | 0.5321                   | 0.0000               | 0.0000                                                                            | 2.28                  |
| 265.3618                           | 0               | 0.0000                   | 1.0000               | 0.0000                                                                            | 1.78                  |

|          |      |        |        |        |      |
|----------|------|--------|--------|--------|------|
| 265.3618 | 0.2  | 0.5260 | 0.0000 | 0.0000 | 2.28 |
| 346.0714 | -0.4 | 0.3305 | 0.0000 | 0.0080 | 1.93 |
| 346.0714 | -0.2 | 0.0828 | 0.0399 | 0.0019 | 1.82 |
| 346.0714 | 0    | 0.0000 | 1.0000 | 0.0000 | 1.78 |
| 346.0714 | 0.2  | 0.0828 | 0.0399 | 0.0019 | 1.82 |
| 346.0714 | 0.4  | 0.3305 | 0.0000 | 0.0080 | 1.93 |
| 386.0777 | -0.2 | 0.3761 | 0.0000 | 0.0001 | 2.10 |
| 386.0777 | 0    | 0.0000 | 1.0000 | 0.0000 | 1.78 |
| 386.0777 | 0.2  | 0.3761 | 0.0000 | 0.0001 | 2.10 |
| 410.6347 | -0.4 | 0.2647 | 0.0000 | 0.0000 | 1.89 |
| 410.6347 | -0.2 | 0.0671 | 0.0735 | 0.0000 | 1.87 |
| 410.6347 | 0    | 0.0000 | 1.0000 | 0.0000 | 1.78 |
| 410.6347 | 0.2  | 0.0663 | 0.0756 | 0.0000 | 1.63 |
| 410.6347 | 0.4  | 0.2682 | 0.0000 | 0.0000 | 1.44 |
| 452.4222 | -0.4 | 0.2916 | 0.0000 | 0.0000 | 1.59 |
| 452.4222 | -0.2 | 0.0729 | 0.0586 | 0.0000 | 1.73 |
| 452.4222 | 0    | 0.0000 | 1.0000 | 0.0000 | 1.78 |
| 452.4222 | 0.2  | 0.0729 | 0.0586 | 0.0000 | 1.73 |
| 452.4222 | 0.4  | 0.2916 | 0.0000 | 0.0000 | 1.59 |
| 463.9413 | -0.2 | 0.3963 | 0.0000 | 0.0000 | 2.11 |
| 463.9413 | 0    | 0.0000 | 1.0000 | 0.0000 | 1.78 |
| 463.9413 | 0.2  | 0.4425 | 0.0000 | 0.0000 | 2.16 |
| 472.6783 | -0.2 | 0.4377 | 0.0000 | 0.0000 | 2.14 |
| 472.6783 | 0    | 0.0000 | 1.0000 | 0.0000 | 1.78 |
| 472.6783 | 0.2  | 0.4377 | 0.0000 | 0.0000 | 2.14 |
| 495.9356 | -0.4 | 0.4156 | 0.0000 | 0.0000 | 1.86 |
| 495.9356 | -0.2 | 0.1040 | 0.0175 | 0.0000 | 1.80 |
| 495.9356 | 0    | 0.0000 | 1.0000 | 0.0000 | 1.78 |
| 495.9356 | 0.2  | 0.1040 | 0.0175 | 0.0000 | 1.80 |
| 495.9356 | 0.4  | 0.4156 | 0.0000 | 0.0000 | 1.86 |
| 508.8233 | -0.4 | 0.6068 | 0.0000 | 0.0073 | 2.00 |
| 508.8233 | -0.2 | 0.1521 | 0.0027 | 0.0019 | 1.84 |
| 508.8233 | 0    | 0.0000 | 1.0000 | 0.0000 | 1.78 |
| 508.8233 | 0.2  | 0.1521 | 0.0027 | 0.0019 | 1.84 |
| 508.8233 | 0.4  | 0.6068 | 0.0000 | 0.0073 | 2.00 |
| 537.4716 | -0.4 | 0.7032 | 0.0000 | 0.0016 | 1.87 |

|          |      |        |        |        |      |
|----------|------|--------|--------|--------|------|
| 537.4716 | -0.2 | 0.1762 | 0.0010 | 0.0004 | 1.80 |
| 537.4716 | 0    | 0.0000 | 1.0000 | 0.0000 | 1.78 |
| 537.4716 | 0.2  | 0.1762 | 0.0010 | 0.0004 | 1.80 |
| 537.4716 | 0.4  | 0.7032 | 0.0000 | 0.0016 | 1.87 |
| 541.6187 | -0.2 | 0.3802 | 0.0000 | 0.0000 | 2.08 |
| 541.6187 | 0    | 0.0000 | 1.0000 | 0.0000 | 1.78 |
| 541.6187 | 0.2  | 0.3785 | 0.0000 | 0.0000 | 2.08 |
| 542.7819 | -0.2 | 0.4527 | 0.0000 | 0.0000 | 2.16 |
| 542.7819 | 0    | 0.0000 | 1.0000 | 0.0000 | 1.78 |
| 542.7819 | 0.2  | 0.4527 | 0.0000 | 0.0000 | 2.16 |
| 600.5809 | -0.4 | 0.6141 | 0.0000 | 0.0000 | 1.74 |
| 600.5809 | -0.2 | 0.1469 | 0.0033 | 0.0000 | 1.79 |
| 600.5809 | 0    | 0.0000 | 1.0000 | 0.0000 | 1.78 |
| 600.5809 | 0.2  | 0.1375 | 0.0047 | 0.0000 | 1.71 |
| 600.5809 | 0.4  | 0.5270 | 0.0000 | 0.0000 | 1.59 |
| 657.8882 | -0.2 | 0.4731 | 0.0000 | 0.0000 | 2.13 |
| 657.8882 | 0    | 0.0000 | 1.0000 | 0.0000 | 1.78 |
| 657.8882 | 0.2  | 0.4731 | 0.0000 | 0.0000 | 2.13 |
| 671.0282 | -0.4 | 0.2766 | 0.0000 | 0.0001 | 1.03 |
| 671.0282 | -0.2 | 0.0692 | 0.0678 | 0.0000 | 1.59 |
| 671.0282 | 0    | 0.0000 | 1.0000 | 0.0000 | 1.78 |
| 671.0282 | 0.2  | 0.0692 | 0.0678 | 0.0000 | 1.59 |
| 671.0282 | 0.4  | 0.2766 | 0.0000 | 0.0001 | 1.03 |
| 671.7679 | -0.2 | 0.4227 | 0.0000 | 0.0000 | 2.14 |
| 671.7679 | 0    | 0.0000 | 1.0000 | 0.0000 | 1.78 |
| 671.7679 | 0.2  | 0.4227 | 0.0000 | 0.0000 | 2.14 |
| 705.2312 | -0.2 | 0.5270 | 0.0000 | 0.0000 | 2.24 |
| 705.2312 | 0    | 0.0000 | 1.0000 | 0.0000 | 1.78 |
| 705.2312 | 0.2  | 0.4690 | 0.0000 | 0.0000 | 2.19 |
| 735.0926 | -0.4 | 0.4943 | 0.0000 | 0.0000 | 1.46 |
| 735.0926 | -0.2 | 0.1236 | 0.0081 | 0.0000 | 1.70 |
| 735.0926 | 0    | 0.0000 | 1.0000 | 0.0000 | 1.78 |
| 735.0926 | 0.2  | 0.1236 | 0.0081 | 0.0000 | 1.70 |
| 735.0926 | 0.4  | 0.4943 | 0.0000 | 0.0000 | 1.46 |
| 749.2936 | -0.2 | 0.4907 | 0.0000 | 0.0000 | 2.18 |
| 749.2936 | 0    | 0.0000 | 1.0000 | 0.0000 | 1.78 |



|          |      |        |        |        |      |
|----------|------|--------|--------|--------|------|
| 749.2936 | 0.2  | 0.4907 | 0.0000 | 0.0000 | 2.18 |
| 772.99   | -0.2 | 0.3485 | 0.0000 | 0.0000 | 2.06 |
| 772.99   | 0    | 0.0000 | 1.0000 | 0.0000 | 1.78 |
| 772.99   | 0.2  | 0.3485 | 0.0000 | 0.0000 | 2.06 |
| 799.9448 | -0.2 | 0.3818 | 0.0000 | 0.0000 | 2.08 |
| 799.9448 | 0    | 0.0000 | 1.0000 | 0.0000 | 1.78 |
| 799.9448 | 0.2  | 0.3818 | 0.0000 | 0.0000 | 2.08 |
| 814.4161 | -0.2 | 0.2920 | 0.0000 | 0.0000 | 1.81 |
| 814.4161 | 0    | 0.0000 | 1.0000 | 0.0000 | 1.78 |
| 814.4161 | 0.2  | 0.2907 | 0.0000 | 0.0000 | 1.78 |
| 827.0289 | -0.2 | 0.2510 | 0.0001 | 0.0030 | 1.77 |
| 827.0289 | 0    | 0.0000 | 1.0000 | 0.0000 | 1.78 |
| 827.0289 | 0.2  | 0.2510 | 0.0001 | 0.0030 | 1.77 |
| 832.8122 | -0.2 | 1.3368 | 0.0000 | 0.0000 | 2.76 |
| 832.8122 | 0    | 0.0000 | 1.0000 | 0.0000 | 1.78 |
| 832.8122 | 0.2  | 1.1132 | 0.0000 | 0.0000 | 2.54 |
| 834.2455 | -0.2 | 0.4308 | 0.0000 | 0.0000 | 2.12 |
| 834.2455 | 0    | 0.0000 | 1.0000 | 0.0000 | 1.78 |
| 834.2455 | 0.2  | 0.4308 | 0.0000 | 0.0000 | 2.12 |
| 837.5518 | -0.2 | 0.4062 | 0.0000 | 0.0000 | 2.10 |
| 837.5518 | 0    | 0.0000 | 1.0000 | 0.0000 | 1.78 |
| 837.5518 | 0.2  | 0.4062 | 0.0000 | 0.0000 | 2.10 |
| 909.0039 | -0.2 | 0.3863 | 0.0000 | 0.0000 | 2.07 |
| 909.0039 | 0    | 0.0000 | 1.0000 | 0.0000 | 1.78 |
| 909.0039 | 0.2  | 0.3863 | 0.0000 | 0.0000 | 2.07 |
| 914.851  | -0.2 | 0.4293 | 0.0000 | 0.0000 | 2.11 |
| 914.851  | 0    | 0.0000 | 1.0000 | 0.0000 | 1.78 |
| 914.851  | 0.2  | 0.4241 | 0.0000 | 0.0000 | 2.11 |
| 950.5543 | -0.2 | 0.8429 | 0.0000 | 0.0000 | 2.53 |
| 950.5543 | 0    | 0.0000 | 1.0000 | 0.0000 | 1.78 |
| 950.5543 | 0.2  | 0.8429 | 0.0000 | 0.0000 | 2.53 |
| 950.868  | -0.2 | 1.0361 | 0.0000 | 0.0000 | 2.73 |
| 950.868  | 0    | 0.0000 | 1.0000 | 0.0000 | 1.78 |
| 950.868  | 0.2  | 0.6339 | 0.0000 | 0.0000 | 2.32 |
| 968.2605 | -0.2 | 0.2744 | 0.0000 | 0.0007 | 1.58 |
| 968.2605 | 0    | 0.0000 | 1.0000 | 0.0000 | 1.78 |

|          |      |        |        |        |      |
|----------|------|--------|--------|--------|------|
| 968.2605 | 0.2  | 0.2744 | 0.0000 | 0.0007 | 1.58 |
| 973.5712 | -0.2 | 0.2767 | 0.0000 | 0.0027 | 1.78 |
| 973.5712 | 0    | 0.0000 | 1.0000 | 0.0000 | 1.78 |
| 973.5712 | 0.2  | 0.2767 | 0.0000 | 0.0027 | 1.78 |
| 1094.269 | -0.2 | 0.2066 | 0.0003 | 0.0000 | 1.73 |
| 1094.269 | 0    | 0.0000 | 1.0000 | 0.0000 | 1.78 |
| 1094.269 | 0.2  | 0.2079 | 0.0003 | 0.0000 | 1.81 |
| 1095.802 | -0.4 | 0.4147 | 0.0000 | 0.0277 | 0.98 |
| 1095.802 | -0.2 | 0.1031 | 0.0181 | 0.0069 | 1.59 |
| 1095.802 | 0    | 0.0000 | 1.0000 | 0.0000 | 1.78 |
| 1095.802 | 0.2  | 0.1031 | 0.0181 | 0.0069 | 1.59 |
| 1095.802 | 0.4  | 0.4147 | 0.0000 | 0.0277 | 0.98 |
| 1121.572 | -0.4 | 0.6161 | 0.0000 | 0.0316 | 1.78 |
| 1121.572 | -0.2 | 0.1569 | 0.0022 | 0.0079 | 1.78 |
| 1121.572 | 0    | 0.0000 | 1.0000 | 0.0000 | 1.78 |
| 1121.572 | 0.2  | 0.1569 | 0.0022 | 0.0079 | 1.78 |
| 1121.572 | 0.4  | 0.6161 | 0.0000 | 0.0316 | 1.78 |
| 1126.038 | -0.4 | 0.6539 | 0.0000 | 0.0000 | 1.72 |
| 1126.038 | -0.2 | 0.1616 | 0.0019 | 0.0000 | 1.77 |
| 1126.038 | 0    | 0.0000 | 1.0000 | 0.0000 | 1.78 |
| 1126.038 | 0.2  | 0.1616 | 0.0019 | 0.0000 | 1.77 |
| 1126.038 | 0.4  | 0.6539 | 0.0000 | 0.0000 | 1.73 |
| 1146.614 | -0.4 | 0.4903 | 0.0000 | 0.0000 | 1.52 |
| 1146.614 | -0.2 | 0.1312 | 0.0061 | 0.0000 | 1.67 |
| 1146.614 | 0    | 0.0000 | 1.0000 | 0.0000 | 1.78 |
| 1146.614 | 0.2  | 0.1410 | 0.0041 | 0.0000 | 1.88 |
| 1146.614 | 0.4  | 0.5736 | 0.0000 | 0.0000 | 1.96 |
| 1191.564 | -0.4 | 0.5436 | 0.0000 | 0.0130 | 1.78 |
| 1191.564 | -0.2 | 0.1366 | 0.0049 | 0.0033 | 1.78 |
| 1191.564 | 0    | 0.0000 | 1.0000 | 0.0000 | 1.78 |
| 1191.564 | 0.2  | 0.1366 | 0.0049 | 0.0033 | 1.78 |
| 1191.564 | 0.4  | 0.5436 | 0.0000 | 0.0130 | 1.78 |
| 1192.66  | -0.2 | 0.2787 | 0.0000 | 0.0000 | 1.73 |
| 1192.66  | 0    | 0.0000 | 1.0000 | 0.0000 | 1.78 |
| 1192.66  | 0.2  | 0.2787 | 0.0000 | 0.0000 | 1.73 |
| 1227.317 | -0.4 | 0.6264 | 0.0000 | 0.0000 | 1.61 |

|          |      |        |        |        |      |
|----------|------|--------|--------|--------|------|
| 1227.317 | -0.2 | 0.1590 | 0.0021 | 0.0000 | 1.74 |
| 1227.317 | 0    | 0.0000 | 1.0000 | 0.0000 | 1.78 |
| 1227.317 | 0.2  | 0.1590 | 0.0021 | 0.0000 | 1.74 |
| 1227.317 | 0.4  | 0.6264 | 0.0000 | 0.0000 | 1.61 |
| 1233.728 | -0.4 | 0.6181 | 0.0000 | 0.0000 | 1.72 |
| 1233.728 | -0.2 | 0.1516 | 0.0027 | 0.0000 | 1.87 |
| 1233.728 | 0    | 0.0000 | 1.0000 | 0.0000 | 1.78 |
| 1233.728 | 0.2  | 0.1420 | 0.0040 | 0.0000 | 1.48 |
| 1233.728 | 0.4  | 0.5358 | 0.0000 | 0.0000 | 0.96 |
| 1241.541 | -0.2 | 0.2125 | 0.0003 | 0.0151 | 1.81 |
| 1241.541 | 0    | 0.0000 | 1.0000 | 0.0000 | 1.78 |
| 1241.541 | 0.2  | 0.2125 | 0.0003 | 0.0151 | 1.81 |
| 1244.182 | -0.4 | 0.7805 | 0.0000 | 0.0809 | 1.56 |
| 1244.182 | -0.2 | 0.1990 | 0.0004 | 0.0202 | 1.73 |
| 1244.182 | 0    | 0.0000 | 1.0000 | 0.0000 | 1.78 |
| 1244.182 | 0.2  | 0.1990 | 0.0004 | 0.0202 | 1.73 |
| 1244.182 | 0.4  | 0.7805 | 0.0000 | 0.0809 | 1.56 |
| 1267.251 | -0.2 | 0.4763 | 0.0000 | 0.0108 | 1.66 |
| 1267.251 | 0    | 0.0000 | 1.0000 | 0.0000 | 1.78 |
| 1267.251 | 0.2  | 0.4763 | 0.0000 | 0.0108 | 1.66 |
| 1335.645 | -0.2 | 0.3552 | 0.0000 | 0.0000 | 1.79 |
| 1335.645 | 0    | 0.0000 | 1.0000 | 0.0000 | 1.78 |
| 1335.645 | 0.2  | 0.3552 | 0.0000 | 0.0000 | 1.79 |
| 1381.674 | -0.2 | 0.4063 | 0.0000 | 0.0000 | 1.74 |
| 1381.674 | 0    | 0.0000 | 1.0000 | 0.0000 | 1.78 |
| 1381.674 | 0.2  | 0.3981 | 0.0000 | 0.0000 | 1.71 |
| 1406.899 | -0.2 | 0.8189 | 0.0000 | 0.0000 | 0.09 |
| 1406.899 | 0    | 0.0000 | 1.0000 | 0.0000 | 1.78 |
| 1406.899 | 0.2  | 0.7522 | 0.0000 | 0.0000 | 1.62 |
| 1440.944 | -0.2 | 0.3083 | 0.0000 | 0.0004 | 1.64 |
| 1440.944 | 0    | 0.0000 | 1.0000 | 0.0000 | 1.78 |
| 1440.944 | 0.2  | 0.3083 | 0.0000 | 0.0004 | 1.64 |
| 1447.854 | -0.2 | 0.2484 | 0.0001 | 0.0000 | 1.77 |
| 1447.854 | 0    | 0.0000 | 1.0000 | 0.0000 | 1.78 |
| 1447.854 | 0.2  | 0.2484 | 0.0001 | 0.0000 | 1.77 |
| 1448.042 | -0.2 | 0.2606 | 0.0000 | 0.0127 | 1.76 |

|          |      |        |        |        |      |
|----------|------|--------|--------|--------|------|
| 1448.042 | 0    | 0.0000 | 1.0000 | 0.0000 | 1.78 |
| 1448.042 | 0.2  | 0.2606 | 0.0000 | 0.0127 | 1.76 |
| 1476.773 | -0.2 | 0.6451 | 0.0000 | 0.0257 | 1.71 |
| 1476.773 | 0    | 0.0000 | 1.0000 | 0.0000 | 1.78 |
| 1476.773 | 0.2  | 0.6451 | 0.0000 | 0.0257 | 1.71 |
| 1511.998 | -0.2 | 0.4111 | 0.0000 | 0.0000 | 1.67 |
| 1511.998 | 0    | 0.0000 | 1.0000 | 0.0000 | 1.78 |
| 1511.998 | 0.2  | 0.4111 | 0.0000 | 0.0000 | 1.67 |
| 1518.967 | -0.2 | 0.3066 | 0.0000 | 0.0121 | 1.62 |
| 1518.967 | 0    | 0.0000 | 1.0000 | 0.0000 | 1.78 |
| 1518.967 | 0.2  | 0.3066 | 0.0000 | 0.0121 | 1.62 |
| 1544.171 | -0.2 | 0.5031 | 0.0000 | 0.0059 | 1.55 |
| 1544.171 | 0    | 0.0000 | 1.0000 | 0.0000 | 1.78 |
| 1544.171 | 0.2  | 0.5031 | 0.0000 | 0.0059 | 1.55 |
| 1544.99  | -0.2 | 0.3448 | 0.0000 | 0.0000 | 1.53 |
| 1544.99  | 0    | 0.0000 | 1.0000 | 0.0000 | 1.78 |
| 1544.99  | 0.2  | 0.3214 | 0.0000 | 0.0000 | 1.68 |
| 1566.303 | -0.2 | 0.6836 | 0.0000 | 0.0191 | 1.64 |
| 1566.303 | 0    | 0.0000 | 1.0000 | 0.0000 | 1.78 |
| 1566.303 | 0.2  | 0.6836 | 0.0000 | 0.0191 | 1.64 |
| 1595.906 | -0.2 | 1.1071 | 0.0000 | 0.0000 | 1.63 |
| 1595.906 | 0    | 0.0000 | 1.0000 | 0.0000 | 1.78 |
| 1595.906 | 0.2  | 1.1071 | 0.0000 | 0.0000 | 1.63 |
| 1658.427 | -0.2 | 0.5747 | 0.0000 | 0.0000 | 1.77 |
| 1658.427 | 0    | 0.0000 | 1.0000 | 0.0000 | 1.78 |
| 1658.427 | 0.2  | 0.5888 | 0.0000 | 0.0000 | 0.09 |
| 3179.196 | -0.2 | 0.4749 | 0.0000 | 0.0000 | 1.43 |
| 3179.196 | 0    | 0.0000 | 1.0000 | 0.0000 | 1.78 |
| 3179.196 | 0.2  | 0.4749 | 0.0000 | 0.0000 | 1.43 |
| 3180.145 | -0.2 | 0.5084 | 0.0000 | 0.0000 | 1.46 |
| 3180.145 | 0    | 0.0000 | 1.0000 | 0.0000 | 1.78 |
| 3180.145 | 0.2  | 0.5084 | 0.0000 | 0.0000 | 1.46 |
| 3183.316 | -0.2 | 0.2327 | 0.0001 | 0.0000 | 1.13 |
| 3183.316 | 0    | 0.0000 | 1.0000 | 0.0000 | 1.78 |
| 3183.316 | 0.2  | 0.2589 | 0.0000 | 0.0000 | 1.27 |
| 3183.942 | -0.2 | 0.2721 | 0.0000 | 0.0133 | 1.23 |

|          |      |        |        |        |      |
|----------|------|--------|--------|--------|------|
| 3183.942 | 0    | 0.0000 | 1.0000 | 0.0000 | 1.78 |
| 3183.942 | 0.2  | 0.2721 | 0.0000 | 0.0133 | 1.23 |
| 3193.919 | -0.2 | 0.5028 | 0.0000 | 0.0001 | 1.45 |
| 3193.919 | 0    | 0.0000 | 1.0000 | 0.0000 | 1.78 |
| 3193.919 | 0.2  | 0.5028 | 0.0000 | 0.0001 | 1.45 |
| 3196.267 | -0.2 | 0.5368 | 0.0000 | 0.0000 | 1.31 |
| 3196.267 | 0    | 0.0000 | 1.0000 | 0.0000 | 1.78 |
| 3196.267 | 0.2  | 0.4377 | 0.0000 | 0.0000 | 1.54 |
| 3196.574 | -0.2 | 0.4971 | 0.0000 | 0.0000 | 1.43 |
| 3196.574 | 0    | 0.0000 | 1.0000 | 0.0000 | 1.78 |
| 3196.574 | 0.2  | 0.4971 | 0.0000 | 0.0000 | 1.43 |
| 3198.147 | -0.2 | 0.5018 | 0.0000 | 0.0112 | 1.45 |
| 3198.147 | 0    | 0.0000 | 1.0000 | 0.0000 | 1.78 |
| 3198.147 | 0.2  | 0.5018 | 0.0000 | 0.0112 | 1.45 |
| 3207.58  | -0.2 | 0.3315 | 0.0000 | 0.0003 | 1.27 |
| 3207.58  | 0    | 0.0000 | 1.0000 | 0.0000 | 1.78 |
| 3207.58  | 0.2  | 0.3315 | 0.0000 | 0.0003 | 1.27 |
| 3208.641 | -0.2 | 0.3702 | 0.0000 | 0.0000 | 1.14 |
| 3208.641 | 0    | 0.0000 | 1.0000 | 0.0000 | 1.78 |
| 3208.641 | 0.2  | 0.3183 | 0.0000 | 0.0000 | 1.41 |

**Table S6.** Photo-physical parameters ( $\Delta E_{Q_p}$ ,  $P_{Q_p}(\text{RT})$ ,  $E_{T_1-S_0}$ , and  $\langle T_1 | \hat{H}_{S_0} | S_0 \rangle_{Q_p}^2$ ) calculated for geometries allowed by normal-mode vibrations with frequency in  $T_1$  at RT for chromophore **S3**.  $\omega_p$  is the wavenumber of the  $p$ th normal vibrational mode in the structure optimized at  $T_1$ .  $Q_p$  is the mass weighted normal coordinates at  $T_1$ . Calculation regarding geometries was stopped when  $\Delta E_{Q_p}$  becomes larger than 0.2 eV because these geometries with  $\Delta E_{Q_p} > 0.2$  eV are hardly allowed below RT.  $E_{T_1-S_0}$  does not largely change for  $Q_p$  with  $P_{Q_p}(\text{RT}) > 0.01$  which corresponds to geometries much allowed at RT.

| $\omega_p$<br>( $\text{cm}^{-1}$ ) | $Q_p$<br>(a.u.) | $\Delta E_{Q_p}$<br>(eV) | $P_{Q_p}(\text{RT})$ | $\langle T_1   \hat{H}_{S_0}   S_0 \rangle_{Q_p}^2$<br>( $\text{cm}^{-2}$ ) | $E_{T_1-S_0}$<br>(eV) |
|------------------------------------|-----------------|--------------------------|----------------------|-----------------------------------------------------------------------------|-----------------------|
| 6.693186                           | -1              | 0.0082                   | 0.7282               | 0.0003                                                                      | 2.17                  |

|          |      |        |        |        |      |
|----------|------|--------|--------|--------|------|
| 6.693186 | -0.8 | 0.0034 | 0.8750 | 0.0002 | 2.17 |
| 6.693186 | -0.6 | 0.0011 | 0.9565 | 0.0001 | 2.17 |
| 6.693186 | -0.4 | 0.0003 | 0.9899 | 0.0001 | 2.17 |
| 6.693186 | -0.2 | 0.0000 | 0.9985 | 0.0000 | 2.17 |
| 6.693186 | 0    | 0.0000 | 1.0000 | 0.0000 | 2.17 |
| 6.693186 | 0.2  | 0.0000 | 0.9986 | 0.0000 | 2.17 |
| 6.693186 | 0.4  | 0.0003 | 0.9893 | 0.0001 | 2.17 |
| 6.693186 | 0.6  | 0.0012 | 0.9549 | 0.0001 | 2.17 |
| 6.693186 | 0.8  | 0.0035 | 0.8728 | 0.0002 | 2.17 |
| 6.693186 | 1    | 0.0083 | 0.7247 | 0.0003 | 2.17 |
| 7.168487 | -1   | 0.0045 | 0.8401 | 0.0025 | 2.17 |
| 7.168487 | -0.8 | 0.0019 | 0.9271 | 0.0016 | 2.17 |
| 7.168487 | -0.6 | 0.0007 | 0.9734 | 0.0009 | 2.17 |
| 7.168487 | -0.4 | 0.0002 | 0.9929 | 0.0004 | 2.17 |
| 7.168487 | -0.2 | 0.0000 | 0.9987 | 0.0001 | 2.17 |
| 7.168487 | 0    | 0.0000 | 1.0000 | 0.0000 | 2.17 |
| 7.168487 | 0.2  | 0.0000 | 0.9987 | 0.0001 | 2.17 |
| 7.168487 | 0.4  | 0.0002 | 0.9925 | 0.0004 | 2.17 |
| 7.168487 | 0.6  | 0.0007 | 0.9722 | 0.0009 | 2.17 |
| 7.168487 | 0.8  | 0.0020 | 0.9248 | 0.0016 | 2.17 |
| 7.168487 | 1    | 0.0046 | 0.8360 | 0.0025 | 2.17 |
| 19.21232 | -1   | 0.0109 | 0.6535 | 0.0002 | 2.16 |
| 19.21232 | -0.8 | 0.0053 | 0.8139 | 0.0002 | 2.16 |
| 19.21232 | -0.6 | 0.0022 | 0.9168 | 0.0001 | 2.17 |
| 19.21232 | -0.4 | 0.0008 | 0.9710 | 0.0000 | 2.17 |
| 19.21232 | -0.2 | 0.0002 | 0.9938 | 0.0000 | 2.17 |
| 19.21232 | 0    | 0.0000 | 1.0000 | 0.0000 | 2.17 |
| 19.21232 | 0.2  | 0.0002 | 0.9939 | 0.0000 | 2.17 |
| 19.21232 | 0.4  | 0.0008 | 0.9711 | 0.0000 | 2.17 |
| 19.21232 | 0.6  | 0.0022 | 0.9171 | 0.0001 | 2.17 |
| 19.21232 | 0.8  | 0.0053 | 0.8142 | 0.0002 | 2.16 |
| 19.21232 | 1    | 0.0109 | 0.6542 | 0.0002 | 2.16 |
| 27.37843 | -0.4 | 0.6269 | 0.0000 | 0.0000 | 1.73 |
| 27.37843 | -0.2 | 0.1522 | 0.0027 | 0.0000 | 2.06 |
| 27.37843 | 0    | 0.0000 | 1.0000 | 0.0000 | 2.17 |
| 27.37843 | 0.2  | 0.1522 | 0.0027 | 0.0000 | 2.06 |

|          |      |        |        |        |      |
|----------|------|--------|--------|--------|------|
| 27.37843 | 0.4  | 0.6271 | 0.0000 | 0.0000 | 1.73 |
| 85.32074 | -1   | 0.0902 | 0.0299 | 0.0071 | 2.14 |
| 85.32074 | -0.8 | 0.0555 | 0.1154 | 0.0047 | 2.15 |
| 85.32074 | -0.6 | 0.0302 | 0.3083 | 0.0026 | 2.16 |
| 85.32074 | -0.4 | 0.0131 | 0.5998 | 0.0012 | 2.16 |
| 85.32074 | -0.2 | 0.0032 | 0.8815 | 0.0003 | 2.17 |
| 85.32074 | 0    | 0.0000 | 1.0000 | 0.0000 | 2.17 |
| 85.32074 | 0.2  | 0.0032 | 0.8815 | 0.0003 | 2.17 |
| 85.32074 | 0.4  | 0.0131 | 0.5998 | 0.0012 | 2.16 |
| 85.32074 | 0.6  | 0.0302 | 0.3083 | 0.0027 | 2.16 |
| 85.32074 | 0.8  | 0.0555 | 0.1153 | 0.0047 | 2.15 |
| 85.32074 | 1    | 0.0902 | 0.0299 | 0.0072 | 2.14 |
| 88.5739  | -1   | 0.1602 | 0.0020 | 0.0894 | 2.12 |
| 88.5739  | -0.8 | 0.0791 | 0.0459 | 0.0580 | 2.14 |
| 88.5739  | -0.6 | 0.0336 | 0.2702 | 0.0329 | 2.15 |
| 88.5739  | -0.4 | 0.0113 | 0.6442 | 0.0147 | 2.16 |
| 88.5739  | -0.2 | 0.0023 | 0.9157 | 0.0037 | 2.17 |
| 88.5739  | 0    | 0.0000 | 1.0000 | 0.0000 | 2.17 |
| 88.5739  | 0.2  | 0.0023 | 0.9159 | 0.0037 | 2.17 |
| 88.5739  | 0.4  | 0.0113 | 0.6446 | 0.0148 | 2.16 |
| 88.5739  | 0.6  | 0.0336 | 0.2707 | 0.0330 | 2.15 |
| 88.5739  | 0.8  | 0.0791 | 0.0461 | 0.0581 | 2.14 |
| 88.5739  | 1    | 0.1601 | 0.0020 | 0.0895 | 2.12 |
| 108.981  | -1   | 0.1274 | 0.0070 | 0.0211 | 2.14 |
| 108.981  | -0.8 | 0.0717 | 0.0614 | 0.0134 | 2.15 |
| 108.981  | -0.6 | 0.0359 | 0.2471 | 0.0075 | 2.16 |
| 108.981  | -0.4 | 0.0145 | 0.5679 | 0.0034 | 2.16 |
| 108.981  | -0.2 | 0.0034 | 0.8753 | 0.0008 | 2.17 |
| 108.981  | 0    | 0.0000 | 1.0000 | 0.0000 | 2.17 |
| 108.981  | 0.2  | 0.0034 | 0.8751 | 0.0008 | 2.17 |
| 108.981  | 0.4  | 0.0145 | 0.5679 | 0.0033 | 2.16 |
| 108.981  | 0.6  | 0.0359 | 0.2472 | 0.0075 | 2.16 |
| 108.981  | 0.8  | 0.0717 | 0.0614 | 0.0134 | 2.15 |
| 108.981  | 1    | 0.1273 | 0.0070 | 0.0210 | 2.14 |
| 111.1957 | -1   | 0.1445 | 0.0036 | 0.0026 | 2.16 |
| 111.1957 | -0.8 | 0.0823 | 0.0407 | 0.0017 | 2.16 |

|          |      |        |        |        |      |
|----------|------|--------|--------|--------|------|
| 111.1957 | -0.6 | 0.0417 | 0.1969 | 0.0009 | 2.17 |
| 111.1957 | -0.4 | 0.0171 | 0.5140 | 0.0004 | 2.17 |
| 111.1957 | -0.2 | 0.0041 | 0.8538 | 0.0001 | 2.17 |
| 111.1957 | 0    | 0.0000 | 1.0000 | 0.0000 | 2.17 |
| 111.1957 | 0.2  | 0.0041 | 0.8538 | 0.0001 | 2.17 |
| 111.1957 | 0.4  | 0.0171 | 0.5138 | 0.0004 | 2.17 |
| 111.1957 | 0.6  | 0.0418 | 0.1967 | 0.0009 | 2.17 |
| 111.1957 | 0.8  | 0.0824 | 0.0405 | 0.0017 | 2.16 |
| 111.1957 | 1    | 0.1446 | 0.0036 | 0.0027 | 2.16 |
| 113.574  | -1   | 0.1348 | 0.0053 | 0.0199 | 2.15 |
| 113.574  | -0.8 | 0.0777 | 0.0486 | 0.0127 | 2.16 |
| 113.574  | -0.6 | 0.0399 | 0.2119 | 0.0071 | 2.16 |
| 113.574  | -0.4 | 0.0165 | 0.5262 | 0.0032 | 2.17 |
| 113.574  | -0.2 | 0.0039 | 0.8578 | 0.0008 | 2.17 |
| 113.574  | 0    | 0.0000 | 1.0000 | 0.0000 | 2.17 |
| 113.574  | 0.2  | 0.0039 | 0.8577 | 0.0008 | 2.17 |
| 113.574  | 0.4  | 0.0165 | 0.5263 | 0.0032 | 2.17 |
| 113.574  | 0.6  | 0.0398 | 0.2120 | 0.0071 | 2.16 |
| 113.574  | 0.8  | 0.0776 | 0.0488 | 0.0128 | 2.16 |
| 113.574  | 1    | 0.1347 | 0.0053 | 0.0199 | 2.15 |
| 113.8822 | -1   | 0.1300 | 0.0063 | 0.0028 | 2.14 |
| 113.8822 | -0.8 | 0.0740 | 0.0562 | 0.0018 | 2.15 |
| 113.8822 | -0.6 | 0.0374 | 0.2330 | 0.0011 | 2.16 |
| 113.8822 | -0.4 | 0.0153 | 0.5516 | 0.0005 | 2.16 |
| 113.8822 | -0.2 | 0.0036 | 0.8686 | 0.0001 | 2.17 |
| 113.8822 | 0    | 0.0000 | 1.0000 | 0.0000 | 2.17 |
| 113.8822 | 0.2  | 0.0036 | 0.8687 | 0.0001 | 2.17 |
| 113.8822 | 0.4  | 0.0153 | 0.5520 | 0.0005 | 2.16 |
| 113.8822 | 0.6  | 0.0374 | 0.2334 | 0.0010 | 2.16 |
| 113.8822 | 0.8  | 0.0738 | 0.0565 | 0.0018 | 2.15 |
| 113.8822 | 1    | 0.1298 | 0.0064 | 0.0027 | 2.14 |
| 150.6288 | -1   | 0.1804 | 0.0009 | 0.0029 | 2.13 |
| 150.6288 | -0.8 | 0.1047 | 0.0170 | 0.0020 | 2.14 |
| 150.6288 | -0.6 | 0.0540 | 0.1220 | 0.0012 | 2.16 |
| 150.6288 | -0.4 | 0.0225 | 0.4173 | 0.0005 | 2.16 |
| 150.6288 | -0.2 | 0.0054 | 0.8110 | 0.0001 | 2.17 |



|          |      |        |        |        |      |
|----------|------|--------|--------|--------|------|
| 150.6288 | 0    | 0.0000 | 1.0000 | 0.0000 | 2.17 |
| 150.6288 | 0.2  | 0.0054 | 0.8110 | 0.0001 | 2.17 |
| 150.6288 | 0.4  | 0.0225 | 0.4171 | 0.0005 | 2.16 |
| 150.6288 | 0.6  | 0.0541 | 0.1218 | 0.0012 | 2.16 |
| 150.6288 | 0.8  | 0.1048 | 0.0169 | 0.0020 | 2.14 |
| 150.6288 | 1    | 0.1807 | 0.0009 | 0.0029 | 2.13 |
| 203.4017 | -0.8 | 0.2306 | 0.0001 | 0.0020 | 2.15 |
| 203.4017 | -0.6 | 0.1251 | 0.0077 | 0.0011 | 2.16 |
| 203.4017 | -0.4 | 0.0541 | 0.1217 | 0.0005 | 2.16 |
| 203.4017 | -0.2 | 0.0133 | 0.5957 | 0.0001 | 2.17 |
| 203.4017 | 0    | 0.0000 | 1.0000 | 0.0000 | 2.17 |
| 203.4017 | 0.2  | 0.0133 | 0.5958 | 0.0001 | 2.17 |
| 203.4017 | 0.4  | 0.0541 | 0.1217 | 0.0005 | 2.16 |
| 203.4017 | 0.6  | 0.1251 | 0.0077 | 0.0011 | 2.16 |
| 203.4017 | 0.8  | 0.2307 | 0.0001 | 0.0020 | 2.15 |
| 206.1301 | -0.8 | 0.2363 | 0.0001 | 0.0072 | 2.12 |
| 206.1301 | -0.6 | 0.1292 | 0.0065 | 0.0040 | 2.14 |
| 206.1301 | -0.4 | 0.0562 | 0.1120 | 0.0018 | 2.16 |
| 206.1301 | -0.2 | 0.0139 | 0.5824 | 0.0005 | 2.17 |
| 206.1301 | 0    | 0.0000 | 1.0000 | 0.0000 | 2.17 |
| 206.1301 | 0.2  | 0.0139 | 0.5825 | 0.0004 | 2.17 |
| 206.1301 | 0.4  | 0.0562 | 0.1120 | 0.0018 | 2.16 |
| 206.1301 | 0.6  | 0.1292 | 0.0065 | 0.0041 | 2.14 |
| 206.1301 | 0.8  | 0.2363 | 0.0001 | 0.0071 | 2.12 |
| 269.3316 | -0.4 | 0.5093 | 0.0000 | 0.0000 | 2.54 |
| 269.3316 | -0.2 | 0.1269 | 0.0071 | 0.0000 | 2.26 |
| 269.3316 | 0    | 0.0000 | 1.0000 | 0.0000 | 2.17 |
| 269.3316 | 0.2  | 0.1270 | 0.0071 | 0.0000 | 2.26 |
| 269.3316 | 0.4  | 0.5095 | 0.0000 | 0.0000 | 2.55 |
| 269.3754 | -0.4 | 0.5809 | 0.0000 | 0.0000 | 2.62 |
| 269.3754 | -0.2 | 0.1468 | 0.0033 | 0.0000 | 2.29 |
| 269.3754 | 0    | 0.0000 | 1.0000 | 0.0000 | 2.17 |
| 269.3754 | 0.2  | 0.1492 | 0.0030 | 0.0000 | 2.27 |
| 269.3754 | 0.4  | 0.6013 | 0.0000 | 0.0000 | 2.61 |
| 277.9128 | -0.4 | 0.5034 | 0.0000 | 0.0000 | 2.39 |
| 277.9128 | -0.2 | 0.1276 | 0.0070 | 0.0000 | 2.20 |

|          |      |        |        |        |      |
|----------|------|--------|--------|--------|------|
| 277.9128 | 0    | 0.0000 | 1.0000 | 0.0000 | 2.17 |
| 277.9128 | 0.2  | 0.1313 | 0.0060 | 0.0000 | 2.30 |
| 277.9128 | 0.4  | 0.5328 | 0.0000 | 0.0000 | 2.62 |
| 278.6469 | -0.6 | 0.3349 | 0.0000 | 0.0040 | 2.14 |
| 278.6469 | -0.4 | 0.1467 | 0.0033 | 0.0017 | 2.15 |
| 278.6469 | -0.2 | 0.0363 | 0.2430 | 0.0004 | 2.17 |
| 278.6469 | 0    | 0.0000 | 1.0000 | 0.0000 | 2.17 |
| 278.6469 | 0.2  | 0.0364 | 0.2429 | 0.0004 | 2.17 |
| 278.6469 | 0.4  | 0.1467 | 0.0033 | 0.0017 | 2.15 |
| 278.6469 | 0.6  | 0.3349 | 0.0000 | 0.0040 | 2.14 |
| 293.286  | -0.6 | 0.3221 | 0.0000 | 0.0001 | 2.12 |
| 293.286  | -0.4 | 0.1414 | 0.0041 | 0.0000 | 2.15 |
| 293.286  | -0.2 | 0.0351 | 0.2552 | 0.0000 | 2.16 |
| 293.286  | 0    | 0.0000 | 1.0000 | 0.0000 | 2.17 |
| 293.286  | 0.2  | 0.0351 | 0.2552 | 0.0000 | 2.16 |
| 293.286  | 0.4  | 0.1414 | 0.0041 | 0.0000 | 2.15 |
| 293.286  | 0.6  | 0.3221 | 0.0000 | 0.0001 | 2.12 |
| 298.3709 | -0.6 | 0.3522 | 0.0000 | 0.0029 | 2.17 |
| 298.3709 | -0.4 | 0.1550 | 0.0024 | 0.0012 | 2.17 |
| 298.3709 | -0.2 | 0.0385 | 0.2233 | 0.0003 | 2.17 |
| 298.3709 | 0    | 0.0000 | 1.0000 | 0.0000 | 2.17 |
| 298.3709 | 0.2  | 0.0385 | 0.2233 | 0.0003 | 2.17 |
| 298.3709 | 0.4  | 0.1550 | 0.0024 | 0.0012 | 2.17 |
| 298.3709 | 0.6  | 0.3522 | 0.0000 | 0.0029 | 2.17 |
| 338.5203 | -0.4 | 0.7215 | 0.0000 | 0.0000 | 2.67 |
| 338.5203 | -0.2 | 0.1801 | 0.0009 | 0.0000 | 2.29 |
| 338.5203 | 0    | 0.0000 | 1.0000 | 0.0000 | 2.17 |
| 338.5203 | 0.2  | 0.1801 | 0.0009 | 0.0000 | 2.29 |
| 338.5203 | 0.4  | 0.7215 | 0.0000 | 0.0000 | 2.67 |
| 349.2156 | -0.4 | 0.7958 | 0.0000 | 0.0000 | 2.80 |
| 349.2156 | -0.2 | 0.1945 | 0.0005 | 0.0000 | 2.33 |
| 349.2156 | 0    | 0.0000 | 1.0000 | 0.0000 | 2.17 |
| 349.2156 | 0.2  | 0.1862 | 0.0007 | 0.0000 | 2.28 |
| 349.2156 | 0.4  | 0.7294 | 0.0000 | 0.0000 | 2.66 |
| 352.2559 | -0.4 | 0.3269 | 0.0000 | 0.0000 | 2.22 |
| 352.2559 | -0.2 | 0.0826 | 0.0402 | 0.0000 | 2.18 |

|          |      |        |        |        |      |
|----------|------|--------|--------|--------|------|
| 352.2559 | 0    | 0.0000 | 1.0000 | 0.0000 | 2.17 |
| 352.2559 | 0.2  | 0.0845 | 0.0374 | 0.0000 | 2.19 |
| 352.2559 | 0.4  | 0.3417 | 0.0000 | 0.0000 | 2.25 |
| 359.1462 | -0.2 | 0.2669 | 0.0000 | 0.0000 | 2.39 |
| 359.1462 | 0    | 0.0000 | 1.0000 | 0.0000 | 2.17 |
| 359.1462 | 0.2  | 0.2669 | 0.0000 | 0.0000 | 2.39 |
| 359.6806 | -0.4 | 0.2309 | 0.0001 | 0.0021 | 2.16 |
| 359.6806 | -0.2 | 0.0574 | 0.1072 | 0.0005 | 2.17 |
| 359.6806 | 0    | 0.0000 | 1.0000 | 0.0000 | 2.17 |
| 359.6806 | 0.2  | 0.0574 | 0.1072 | 0.0005 | 2.17 |
| 359.6806 | 0.4  | 0.2309 | 0.0001 | 0.0021 | 2.16 |
| 382.7521 | -0.4 | 0.2642 | 0.0000 | 0.0026 | 2.15 |
| 382.7521 | -0.2 | 0.0658 | 0.0773 | 0.0007 | 2.17 |
| 382.7521 | 0    | 0.0000 | 1.0000 | 0.0000 | 2.17 |
| 382.7521 | 0.2  | 0.0658 | 0.0773 | 0.0007 | 2.17 |
| 382.7521 | 0.4  | 0.2643 | 0.0000 | 0.0026 | 2.15 |
| 387.7332 | -0.4 | 0.2672 | 0.0000 | 0.0014 | 2.16 |
| 387.7332 | -0.2 | 0.0665 | 0.0752 | 0.0004 | 2.17 |
| 387.7332 | 0    | 0.0000 | 1.0000 | 0.0000 | 2.17 |
| 387.7332 | 0.2  | 0.0665 | 0.0752 | 0.0004 | 2.17 |
| 387.7332 | 0.4  | 0.2672 | 0.0000 | 0.0014 | 2.16 |
| 395.6062 | -0.4 | 0.5016 | 0.0000 | 0.0000 | 2.36 |
| 395.6062 | -0.2 | 0.1248 | 0.0078 | 0.0000 | 2.23 |
| 395.6062 | 0    | 0.0000 | 1.0000 | 0.0000 | 2.17 |
| 395.6062 | 0.2  | 0.1240 | 0.0080 | 0.0000 | 2.17 |
| 395.6062 | 0.4  | 0.4951 | 0.0000 | 0.0000 | 2.22 |
| 440.8003 | -0.4 | 0.7738 | 0.0000 | 0.0000 | 2.43 |
| 440.8003 | -0.2 | 0.1932 | 0.0005 | 0.0000 | 2.23 |
| 440.8003 | 0    | 0.0000 | 1.0000 | 0.0000 | 2.17 |
| 440.8003 | 0.2  | 0.1932 | 0.0005 | 0.0000 | 2.23 |
| 440.8003 | 0.4  | 0.7737 | 0.0000 | 0.0000 | 2.43 |
| 446.6768 | -0.4 | 0.2476 | 0.0001 | 0.0013 | 2.13 |
| 446.6768 | -0.2 | 0.0614 | 0.0915 | 0.0004 | 2.16 |
| 446.6768 | 0    | 0.0000 | 1.0000 | 0.0000 | 2.17 |
| 446.6768 | 0.2  | 0.0614 | 0.0915 | 0.0004 | 2.16 |
| 446.6768 | 0.4  | 0.2476 | 0.0001 | 0.0014 | 2.13 |

|          |      |        |        |        |      |
|----------|------|--------|--------|--------|------|
| 470.6066 | -0.4 | 0.2156 | 0.0002 | 0.0054 | 2.16 |
| 470.6066 | -0.2 | 0.0531 | 0.1264 | 0.0014 | 2.17 |
| 470.6066 | 0    | 0.0000 | 1.0000 | 0.0000 | 2.17 |
| 470.6066 | 0.2  | 0.0531 | 0.1264 | 0.0014 | 2.17 |
| 470.6066 | 0.4  | 0.2156 | 0.0002 | 0.0054 | 2.16 |
| 475.0292 | -0.4 | 0.3100 | 0.0000 | 0.0031 | 2.16 |
| 475.0292 | -0.2 | 0.0771 | 0.0497 | 0.0008 | 2.17 |
| 475.0292 | 0    | 0.0000 | 1.0000 | 0.0000 | 2.17 |
| 475.0292 | 0.2  | 0.0771 | 0.0497 | 0.0008 | 2.17 |
| 475.0292 | 0.4  | 0.3100 | 0.0000 | 0.0031 | 2.16 |
| 479.1152 | -0.2 | 0.3343 | 0.0000 | 0.0000 | 2.31 |
| 479.1152 | 0    | 0.0000 | 1.0000 | 0.0000 | 2.17 |
| 479.1152 | 0.2  | 0.3342 | 0.0000 | 0.0000 | 2.31 |
| 486.3848 | -0.4 | 0.2134 | 0.0002 | 0.0004 | 2.14 |
| 486.3848 | -0.2 | 0.0530 | 0.1272 | 0.0001 | 2.16 |
| 486.3848 | 0    | 0.0000 | 1.0000 | 0.0000 | 2.17 |
| 486.3848 | 0.2  | 0.0530 | 0.1272 | 0.0001 | 2.16 |
| 486.3848 | 0.4  | 0.2134 | 0.0002 | 0.0004 | 2.14 |
| 505.5759 | -0.2 | 0.4020 | 0.0000 | 0.0000 | 2.42 |
| 505.5759 | 0    | 0.0000 | 1.0000 | 0.0000 | 2.17 |
| 505.5759 | 0.2  | 0.4036 | 0.0000 | 0.0000 | 2.45 |
| 513.4655 | -0.2 | 0.4179 | 0.0000 | 0.0000 | 2.47 |
| 513.4655 | 0    | 0.0000 | 1.0000 | 0.0000 | 2.17 |
| 513.4655 | 0.2  | 0.4180 | 0.0000 | 0.0000 | 2.47 |
| 520.6985 | -0.4 | 0.2919 | 0.0000 | 0.0092 | 2.14 |
| 520.6985 | -0.2 | 0.0725 | 0.0596 | 0.0023 | 2.16 |
| 520.6985 | 0    | 0.0000 | 1.0000 | 0.0000 | 2.17 |
| 520.6985 | 0.2  | 0.0725 | 0.0596 | 0.0023 | 2.16 |
| 520.6985 | 0.4  | 0.2919 | 0.0000 | 0.0092 | 2.14 |
| 541.9896 | -0.4 | 0.3919 | 0.0000 | 0.0002 | 2.15 |
| 541.9896 | -0.2 | 0.0976 | 0.0224 | 0.0001 | 2.16 |
| 541.9896 | 0    | 0.0000 | 1.0000 | 0.0000 | 2.17 |
| 541.9896 | 0.2  | 0.0976 | 0.0224 | 0.0001 | 2.16 |
| 541.9896 | 0.4  | 0.3919 | 0.0000 | 0.0002 | 2.15 |
| 545.3867 | -0.4 | 0.4156 | 0.0000 | 0.0014 | 2.14 |
| 545.3867 | -0.2 | 0.1036 | 0.0177 | 0.0003 | 2.16 |

|          |      |        |        |        |      |
|----------|------|--------|--------|--------|------|
| 545.3867 | 0    | 0.0000 | 1.0000 | 0.0000 | 2.17 |
| 545.3867 | 0.2  | 0.1036 | 0.0177 | 0.0004 | 2.16 |
| 545.3867 | 0.4  | 0.4156 | 0.0000 | 0.0014 | 2.14 |
| 548.8204 | -0.2 | 0.4258 | 0.0000 | 0.0000 | 2.47 |
| 548.8204 | 0    | 0.0000 | 1.0000 | 0.0000 | 2.17 |
| 548.8204 | 0.2  | 0.4155 | 0.0000 | 0.0000 | 2.34 |
| 549.3185 | -0.2 | 0.2850 | 0.0000 | 0.0000 | 2.25 |
| 549.3185 | 0    | 0.0000 | 1.0000 | 0.0000 | 2.17 |
| 549.3185 | 0.2  | 0.2850 | 0.0000 | 0.0000 | 2.25 |
| 550.0177 | -0.4 | 0.3332 | 0.0000 | 0.0045 | 2.16 |
| 550.0177 | -0.2 | 0.0824 | 0.0404 | 0.0012 | 2.17 |
| 550.0177 | 0    | 0.0000 | 1.0000 | 0.0000 | 2.17 |
| 550.0177 | 0.2  | 0.0824 | 0.0404 | 0.0012 | 2.17 |
| 550.0177 | 0.4  | 0.3332 | 0.0000 | 0.0045 | 2.16 |
| 558.2586 | -0.4 | 0.3789 | 0.0000 | 0.0014 | 2.16 |
| 558.2586 | -0.2 | 0.0940 | 0.0258 | 0.0003 | 2.17 |
| 558.2586 | 0    | 0.0000 | 1.0000 | 0.0000 | 2.17 |
| 558.2586 | 0.2  | 0.0940 | 0.0258 | 0.0003 | 2.17 |
| 558.2586 | 0.4  | 0.3789 | 0.0000 | 0.0013 | 2.16 |
| 584.1068 | -0.2 | 0.4814 | 0.0000 | 0.0000 | 2.43 |
| 584.1068 | 0    | 0.0000 | 1.0000 | 0.0000 | 2.17 |
| 584.1068 | 0.2  | 0.4814 | 0.0000 | 0.0000 | 2.43 |
| 589.1288 | -0.2 | 0.4982 | 0.0000 | 0.0013 | 2.15 |
| 589.1288 | 0    | 0.0000 | 1.0000 | 0.0000 | 2.17 |
| 589.1288 | 0.2  | 0.4981 | 0.0000 | 0.0013 | 2.15 |
| 600.0343 | -0.2 | 0.4242 | 0.0000 | 0.0000 | 2.39 |
| 600.0343 | 0    | 0.0000 | 1.0000 | 0.0000 | 2.17 |
| 600.0343 | 0.2  | 0.4248 | 0.0000 | 0.0000 | 2.49 |
| 608.7484 | -0.4 | 0.2367 | 0.0001 | 0.0635 | 2.12 |
| 608.7484 | -0.2 | 0.0526 | 0.1288 | 0.0154 | 2.16 |
| 608.7484 | 0    | 0.0000 | 1.0000 | 0.0000 | 2.17 |
| 608.7484 | 0.2  | 0.0526 | 0.1288 | 0.0154 | 2.16 |
| 608.7484 | 0.4  | 0.2367 | 0.0001 | 0.0633 | 2.12 |
| 614.457  | -0.2 | 0.4087 | 0.0000 | 0.0000 | 2.35 |
| 614.457  | 0    | 0.0000 | 1.0000 | 0.0000 | 2.17 |
| 614.457  | 0.2  | 0.4088 | 0.0000 | 0.0000 | 2.35 |

|          |      |        |        |        |      |
|----------|------|--------|--------|--------|------|
| 616.4867 | -0.2 | 0.8099 | 0.0000 | 0.0000 | 2.70 |
| 616.4867 | 0    | 0.0000 | 1.0000 | 0.0000 | 2.17 |
| 616.4867 | 0.2  | 0.8238 | 0.0000 | 0.0000 | 2.77 |
| 617.8598 | -0.4 | 0.4152 | 0.0000 | 0.0038 | 2.14 |
| 617.8598 | -0.2 | 0.1017 | 0.0191 | 0.0010 | 2.16 |
| 617.8598 | 0    | 0.0000 | 1.0000 | 0.0000 | 2.17 |
| 617.8598 | 0.2  | 0.1017 | 0.0191 | 0.0010 | 2.16 |
| 617.8598 | 0.4  | 0.4151 | 0.0000 | 0.0039 | 2.14 |
| 619.5483 | -0.2 | 0.7489 | 0.0000 | 0.0000 | 2.66 |
| 619.5483 | 0    | 0.0000 | 1.0000 | 0.0000 | 2.17 |
| 619.5483 | 0.2  | 0.7489 | 0.0000 | 0.0000 | 2.66 |
| 628.4357 | -0.4 | 0.5133 | 0.0000 | 0.0420 | 2.13 |
| 628.4357 | -0.2 | 0.1226 | 0.0085 | 0.0096 | 2.16 |
| 628.4357 | 0    | 0.0000 | 1.0000 | 0.0000 | 2.17 |
| 628.4357 | 0.2  | 0.1226 | 0.0085 | 0.0097 | 2.16 |
| 628.4357 | 0.4  | 0.5133 | 0.0000 | 0.0422 | 2.13 |
| 629.6633 | -0.4 | 0.5853 | 0.0000 | 0.0016 | 2.15 |
| 629.6633 | -0.2 | 0.1458 | 0.0034 | 0.0004 | 2.16 |
| 629.6633 | 0    | 0.0000 | 1.0000 | 0.0000 | 2.17 |
| 629.6633 | 0.2  | 0.1458 | 0.0034 | 0.0005 | 2.16 |
| 629.6633 | 0.4  | 0.5853 | 0.0000 | 0.0016 | 2.15 |
| 636.899  | -0.2 | 0.4983 | 0.0000 | 0.0000 | 2.24 |
| 636.899  | 0    | 0.0000 | 1.0000 | 0.0000 | 2.17 |
| 636.899  | 0.2  | 0.4981 | 0.0000 | 0.0000 | 2.24 |
| 657.8741 | -0.4 | 0.6679 | 0.0000 | 0.0086 | 2.13 |
| 657.8741 | -0.2 | 0.1564 | 0.0023 | 0.0022 | 2.16 |
| 657.8741 | 0    | 0.0000 | 1.0000 | 0.0000 | 2.17 |
| 657.8741 | 0.2  | 0.1564 | 0.0023 | 0.0022 | 2.16 |
| 657.8741 | 0.4  | 0.6679 | 0.0000 | 0.0086 | 2.13 |
| 671.8449 | -0.4 | 0.4757 | 0.0000 | 0.0069 | 2.14 |
| 671.8449 | -0.2 | 0.1170 | 0.0105 | 0.0017 | 2.16 |
| 671.8449 | 0    | 0.0000 | 1.0000 | 0.0000 | 2.17 |
| 671.8449 | 0.2  | 0.1170 | 0.0105 | 0.0017 | 2.16 |
| 671.8449 | 0.4  | 0.4758 | 0.0000 | 0.0069 | 2.14 |
| 673.7647 | -0.2 | 0.6854 | 0.0000 | 0.0000 | 2.58 |
| 673.7647 | 0    | 0.0000 | 1.0000 | 0.0000 | 2.17 |

|          |      |        |        |        |      |
|----------|------|--------|--------|--------|------|
| 673.7647 | 0.2  | 0.6808 | 0.0000 | 0.0000 | 2.64 |
| 682.5581 | -0.2 | 0.5833 | 0.0000 | 0.0000 | 2.58 |
| 682.5581 | 0    | 0.0000 | 1.0000 | 0.0000 | 2.17 |
| 682.5581 | 0.2  | 0.5940 | 0.0000 | 0.0000 | 2.39 |
| 701.8259 | -0.4 | 0.2673 | 0.0000 | 0.0015 | 2.15 |
| 701.8259 | -0.2 | 0.0643 | 0.0818 | 0.0004 | 2.17 |
| 701.8259 | 0    | 0.0000 | 1.0000 | 0.0000 | 2.17 |
| 701.8259 | 0.2  | 0.0643 | 0.0818 | 0.0004 | 2.17 |
| 701.8259 | 0.4  | 0.2673 | 0.0000 | 0.0015 | 2.15 |
| 704.4075 | -0.4 | 0.3893 | 0.0000 | 0.0446 | 2.14 |
| 704.4075 | -0.2 | 0.0910 | 0.0290 | 0.0109 | 2.16 |
| 704.4075 | 0    | 0.0000 | 1.0000 | 0.0000 | 2.17 |
| 704.4075 | 0.2  | 0.0910 | 0.0290 | 0.0110 | 2.16 |
| 704.4075 | 0.4  | 0.3893 | 0.0000 | 0.0446 | 2.14 |
| 719.8843 | -0.4 | 0.3769 | 0.0000 | 0.0017 | 2.16 |
| 719.8843 | -0.2 | 0.0894 | 0.0308 | 0.0004 | 2.17 |
| 719.8843 | 0    | 0.0000 | 1.0000 | 0.0000 | 2.17 |
| 719.8843 | 0.2  | 0.0894 | 0.0308 | 0.0004 | 2.17 |
| 719.8843 | 0.4  | 0.3770 | 0.0000 | 0.0017 | 2.16 |
| 729.3221 | -0.4 | 0.3747 | 0.0000 | 0.0190 | 2.11 |
| 729.3221 | -0.2 | 0.0869 | 0.0339 | 0.0040 | 2.15 |
| 729.3221 | 0    | 0.0000 | 1.0000 | 0.0000 | 2.17 |
| 729.3221 | 0.2  | 0.0869 | 0.0340 | 0.0040 | 2.15 |
| 729.3221 | 0.4  | 0.3743 | 0.0000 | 0.0192 | 2.11 |
| 730.1069 | -0.2 | 0.4954 | 0.0000 | 0.0000 | 2.32 |
| 730.1069 | 0    | 0.0000 | 1.0000 | 0.0000 | 2.17 |
| 730.1069 | 0.2  | 0.4862 | 0.0000 | 0.0000 | 2.38 |
| 732.2048 | -0.2 | 0.6689 | 0.0000 | 0.0000 | 2.24 |
| 732.2048 | 0    | 0.0000 | 1.0000 | 0.0000 | 2.17 |
| 732.2048 | 0.2  | 0.6690 | 0.0000 | 0.0000 | 2.24 |
| 736.4454 | -0.4 | 0.7856 | 0.0000 | 0.0001 | 2.14 |
| 736.4454 | -0.2 | 0.1917 | 0.0006 | 0.0000 | 2.16 |
| 736.4454 | 0    | 0.0000 | 1.0000 | 0.0000 | 2.17 |
| 736.4454 | 0.2  | 0.1917 | 0.0006 | 0.0000 | 2.16 |
| 736.4454 | 0.4  | 0.7856 | 0.0000 | 0.0001 | 2.14 |
| 740.6618 | -0.4 | 0.3746 | 0.0000 | 0.0114 | 2.12 |

|          |      |        |        |        |      |
|----------|------|--------|--------|--------|------|
| 740.6618 | -0.2 | 0.0896 | 0.0306 | 0.0026 | 2.16 |
| 740.6618 | 0    | 0.0000 | 1.0000 | 0.0000 | 2.17 |
| 740.6618 | 0.2  | 0.0896 | 0.0306 | 0.0026 | 2.16 |
| 740.6618 | 0.4  | 0.3746 | 0.0000 | 0.0114 | 2.12 |
| 748.7383 | -0.4 | 0.5804 | 0.0000 | 0.0007 | 2.14 |
| 748.7383 | -0.2 | 0.1403 | 0.0042 | 0.0001 | 2.16 |
| 748.7383 | 0    | 0.0000 | 1.0000 | 0.0000 | 2.17 |
| 748.7383 | 0.2  | 0.1403 | 0.0042 | 0.0001 | 2.16 |
| 748.7383 | 0.4  | 0.5804 | 0.0000 | 0.0007 | 2.14 |
| 778.7561 | -0.4 | 0.4736 | 0.0000 | 0.0020 | 2.15 |
| 778.7561 | -0.2 | 0.1138 | 0.0119 | 0.0004 | 2.16 |
| 778.7561 | 0    | 0.0000 | 1.0000 | 0.0000 | 2.17 |
| 778.7561 | 0.2  | 0.1138 | 0.0119 | 0.0004 | 2.16 |
| 778.7561 | 0.4  | 0.4738 | 0.0000 | 0.0020 | 2.15 |
| 779.9458 | -0.4 | 0.4010 | 0.0000 | 0.0007 | 2.15 |
| 779.9458 | -0.2 | 0.0970 | 0.0230 | 0.0002 | 2.16 |
| 779.9458 | 0    | 0.0000 | 1.0000 | 0.0000 | 2.17 |
| 779.9458 | 0.2  | 0.0970 | 0.0230 | 0.0002 | 2.17 |
| 779.9458 | 0.4  | 0.4010 | 0.0000 | 0.0007 | 2.15 |
| 783.8576 | -0.2 | 0.6447 | 0.0000 | 0.0000 | 2.50 |
| 783.8576 | 0    | 0.0000 | 1.0000 | 0.0000 | 2.17 |
| 783.8576 | 0.2  | 0.6448 | 0.0000 | 0.0000 | 2.50 |
| 794.0373 | -0.4 | 0.4072 | 0.0000 | 0.0001 | 2.16 |
| 794.0373 | -0.2 | 0.0974 | 0.0226 | 0.0000 | 2.17 |
| 794.0373 | 0    | 0.0000 | 1.0000 | 0.0000 | 2.17 |
| 794.0373 | 0.2  | 0.0974 | 0.0226 | 0.0000 | 2.17 |
| 794.0373 | 0.4  | 0.4074 | 0.0000 | 0.0001 | 2.16 |
| 804.04   | -0.4 | 0.5034 | 0.0000 | 0.0050 | 2.16 |
| 804.04   | -0.2 | 0.1213 | 0.0089 | 0.0012 | 2.17 |
| 804.04   | 0    | 0.0000 | 1.0000 | 0.0000 | 2.17 |
| 804.04   | 0.2  | 0.1212 | 0.0089 | 0.0012 | 2.17 |
| 804.04   | 0.4  | 0.5033 | 0.0000 | 0.0049 | 2.16 |
| 816.5392 | -0.4 | 0.6432 | 0.0000 | 0.0000 | 2.16 |
| 816.5392 | -0.2 | 0.1568 | 0.0022 | 0.0000 | 2.17 |
| 816.5392 | 0    | 0.0000 | 1.0000 | 0.0000 | 2.17 |
| 816.5392 | 0.2  | 0.1568 | 0.0022 | 0.0000 | 2.17 |



|          |      |        |        |        |      |
|----------|------|--------|--------|--------|------|
| 816.5392 | 0.4  | 0.6431 | 0.0000 | 0.0000 | 2.16 |
| 822.2244 | -0.2 | 0.6555 | 0.0000 | 0.0000 | 2.32 |
| 822.2244 | 0    | 0.0000 | 1.0000 | 0.0000 | 2.17 |
| 822.2244 | 0.2  | 0.6483 | 0.0000 | 0.0000 | 2.50 |
| 831.5109 | -0.2 | 0.6632 | 0.0000 | 0.0000 | 2.53 |
| 831.5109 | 0    | 0.0000 | 1.0000 | 0.0000 | 2.17 |
| 831.5109 | 0.2  | 0.6609 | 0.0000 | 0.0000 | 2.47 |
| 831.9304 | -0.2 | 0.5580 | 0.0000 | 0.0000 | 2.38 |
| 831.9304 | 0    | 0.0000 | 1.0000 | 0.0000 | 2.17 |
| 831.9304 | 0.2  | 0.5579 | 0.0000 | 0.0000 | 2.38 |
| 837.4686 | -0.4 | 0.3906 | 0.0000 | 0.0297 | 2.14 |
| 837.4686 | -0.2 | 0.0902 | 0.0298 | 0.0069 | 2.16 |
| 837.4686 | 0    | 0.0000 | 1.0000 | 0.0000 | 2.17 |
| 837.4686 | 0.2  | 0.0902 | 0.0298 | 0.0069 | 2.16 |
| 837.4686 | 0.4  | 0.3905 | 0.0000 | 0.0297 | 2.14 |
| 838.1342 | -0.4 | 0.3744 | 0.0000 | 0.0327 | 2.14 |
| 838.1342 | -0.2 | 0.0866 | 0.0344 | 0.0079 | 2.16 |
| 838.1342 | 0    | 0.0000 | 1.0000 | 0.0000 | 2.17 |
| 838.1342 | 0.2  | 0.0866 | 0.0344 | 0.0079 | 2.16 |
| 838.1342 | 0.4  | 0.3746 | 0.0000 | 0.0327 | 2.14 |
| 862.8917 | -0.2 | 0.4308 | 0.0000 | 0.0000 | 2.11 |
| 862.8917 | 0    | 0.0000 | 1.0000 | 0.0000 | 2.17 |
| 862.8917 | 0.2  | 0.4308 | 0.0000 | 0.0000 | 2.11 |
| 869.4674 | -0.4 | 0.3793 | 0.0000 | 0.0037 | 2.17 |
| 869.4674 | -0.2 | 0.0882 | 0.0323 | 0.0008 | 2.17 |
| 869.4674 | 0    | 0.0000 | 1.0000 | 0.0000 | 2.17 |
| 869.4674 | 0.2  | 0.0882 | 0.0324 | 0.0008 | 2.17 |
| 869.4674 | 0.4  | 0.3792 | 0.0000 | 0.0037 | 2.17 |
| 885.1453 | -0.4 | 0.3525 | 0.0000 | 0.0288 | 2.17 |
| 885.1453 | -0.2 | 0.0827 | 0.0399 | 0.0068 | 2.17 |
| 885.1453 | 0    | 0.0000 | 1.0000 | 0.0000 | 2.17 |
| 885.1453 | 0.2  | 0.0827 | 0.0399 | 0.0069 | 2.17 |
| 885.1453 | 0.4  | 0.3525 | 0.0000 | 0.0287 | 2.17 |
| 885.4654 | -0.2 | 0.8220 | 0.0000 | 0.0000 | 2.62 |
| 885.4654 | 0    | 0.0000 | 1.0000 | 0.0000 | 2.17 |
| 885.4654 | 0.2  | 0.8739 | 0.0000 | 0.0000 | 2.64 |

|          |      |        |        |        |      |
|----------|------|--------|--------|--------|------|
| 888.0639 | -0.2 | 0.5557 | 0.0000 | 0.0000 | 2.33 |
| 888.0639 | 0    | 0.0000 | 1.0000 | 0.0000 | 2.17 |
| 888.0639 | 0.2  | 0.5558 | 0.0000 | 0.0000 | 2.33 |
| 897.4888 | -0.4 | 0.3419 | 0.0000 | 0.0083 | 2.17 |
| 897.4888 | -0.2 | 0.0815 | 0.0419 | 0.0019 | 2.17 |
| 897.4888 | 0    | 0.0000 | 1.0000 | 0.0000 | 2.17 |
| 897.4888 | 0.2  | 0.0815 | 0.0420 | 0.0019 | 2.17 |
| 897.4888 | 0.4  | 0.3417 | 0.0000 | 0.0082 | 2.17 |
| 934.8007 | -0.4 | 0.3820 | 0.0000 | 0.0736 | 2.16 |
| 934.8007 | -0.2 | 0.0857 | 0.0356 | 0.0177 | 2.17 |
| 934.8007 | 0    | 0.0000 | 1.0000 | 0.0000 | 2.17 |
| 934.8007 | 0.2  | 0.0857 | 0.0355 | 0.0177 | 2.17 |
| 934.8007 | 0.4  | 0.3820 | 0.0000 | 0.0736 | 2.16 |
| 947.2447 | -0.4 | 0.3612 | 0.0000 | 0.0065 | 2.17 |
| 947.2447 | -0.2 | 0.0873 | 0.0335 | 0.0016 | 2.17 |
| 947.2447 | 0    | 0.0000 | 1.0000 | 0.0000 | 2.17 |
| 947.2447 | 0.2  | 0.0873 | 0.0335 | 0.0016 | 2.17 |
| 947.2447 | 0.4  | 0.3612 | 0.0000 | 0.0065 | 2.17 |
| 947.9452 | -0.4 | 0.3684 | 0.0000 | 0.0477 | 2.17 |
| 947.9452 | -0.2 | 0.0872 | 0.0336 | 0.0115 | 2.17 |
| 947.9452 | 0    | 0.0000 | 1.0000 | 0.0000 | 2.17 |
| 947.9452 | 0.2  | 0.0872 | 0.0336 | 0.0116 | 2.17 |
| 947.9452 | 0.4  | 0.3685 | 0.0000 | 0.0478 | 2.17 |
| 952.7171 | -0.4 | 0.3592 | 0.0000 | 0.0054 | 2.16 |
| 952.7171 | -0.2 | 0.0866 | 0.0344 | 0.0013 | 2.17 |
| 952.7171 | 0    | 0.0000 | 1.0000 | 0.0000 | 2.17 |
| 952.7171 | 0.2  | 0.0866 | 0.0344 | 0.0013 | 2.17 |
| 952.7171 | 0.4  | 0.3592 | 0.0000 | 0.0054 | 2.16 |
| 956.6845 | -0.4 | 0.3680 | 0.0000 | 0.0002 | 2.17 |
| 956.6845 | -0.2 | 0.0880 | 0.0326 | 0.0000 | 2.17 |
| 956.6845 | 0    | 0.0000 | 1.0000 | 0.0000 | 2.17 |
| 956.6845 | 0.2  | 0.0880 | 0.0326 | 0.0000 | 2.17 |
| 956.6845 | 0.4  | 0.3680 | 0.0000 | 0.0002 | 2.17 |
| 958.8011 | -0.2 | 0.5040 | 0.0000 | 0.0000 | 2.34 |
| 958.8011 | 0    | 0.0000 | 1.0000 | 0.0000 | 2.17 |
| 958.8011 | 0.2  | 0.5051 | 0.0000 | 0.0000 | 2.34 |

|          |      |        |        |        |      |
|----------|------|--------|--------|--------|------|
| 958.9239 | -0.2 | 0.6498 | 0.0000 | 0.0000 | 2.06 |
| 958.9239 | 0    | 0.0000 | 1.0000 | 0.0000 | 2.17 |
| 958.9239 | 0.2  | 0.6450 | 0.0000 | 0.0000 | 2.36 |
| 964.1914 | -0.4 | 0.3724 | 0.0000 | 0.0000 | 2.17 |
| 964.1914 | -0.2 | 0.0887 | 0.0317 | 0.0000 | 2.17 |
| 964.1914 | 0    | 0.0000 | 1.0000 | 0.0000 | 2.17 |
| 964.1914 | 0.2  | 0.0887 | 0.0317 | 0.0000 | 2.17 |
| 964.1914 | 0.4  | 0.3725 | 0.0000 | 0.0000 | 2.17 |
| 998.7034 | -0.2 | 0.7370 | 0.0000 | 0.0000 | 2.34 |
| 998.7034 | 0    | 0.0000 | 1.0000 | 0.0000 | 2.17 |
| 998.7034 | 0.2  | 0.7470 | 0.0000 | 0.0000 | 2.30 |
| 1014.965 | -0.2 | 0.8273 | 0.0000 | 0.0000 | 2.28 |
| 1014.965 | 0    | 0.0000 | 1.0000 | 0.0000 | 2.17 |
| 1014.965 | 0.2  | 0.8471 | 0.0000 | 0.0000 | 2.33 |
| 1076.7   | -0.2 | 0.4900 | 0.0000 | 0.0000 | 2.30 |
| 1076.7   | 0    | 0.0000 | 1.0000 | 0.0000 | 2.17 |
| 1076.7   | 0.2  | 0.4899 | 0.0000 | 0.0000 | 2.30 |
| 1087.53  | -0.2 | 0.6578 | 0.0000 | 0.0000 | 2.39 |
| 1087.53  | 0    | 0.0000 | 1.0000 | 0.0000 | 2.17 |
| 1087.53  | 0.2  | 0.6411 | 0.0000 | 0.0000 | 2.13 |
| 1098.438 | -0.2 | 0.5899 | 0.0000 | 0.0000 | 2.28 |
| 1098.438 | 0    | 0.0000 | 1.0000 | 0.0000 | 2.17 |
| 1098.438 | 0.2  | 0.5571 | 0.0000 | 0.0000 | 2.42 |
| 1118.063 | -0.2 | 0.4454 | 0.0000 | 0.0000 | 2.33 |
| 1118.063 | 0    | 0.0000 | 1.0000 | 0.0000 | 2.17 |
| 1118.063 | 0.2  | 0.4455 | 0.0000 | 0.0000 | 2.33 |
| 1129.154 | -0.2 | 0.3605 | 0.0000 | 0.0000 | 2.36 |
| 1129.154 | 0    | 0.0000 | 1.0000 | 0.0000 | 2.17 |
| 1129.154 | 0.2  | 0.3877 | 0.0000 | 0.0000 | 2.39 |
| 1130.935 | -0.2 | 0.4327 | 0.0000 | 0.0000 | 2.35 |
| 1130.935 | 0    | 0.0000 | 1.0000 | 0.0000 | 2.17 |
| 1130.935 | 0.2  | 0.4326 | 0.0000 | 0.0000 | 2.35 |
| 1131.611 | -0.2 | 0.3267 | 0.0000 | 0.0000 | 2.35 |
| 1131.611 | 0    | 0.0000 | 1.0000 | 0.0000 | 2.17 |
| 1131.611 | 0.2  | 0.3714 | 0.0000 | 0.0000 | 2.35 |
| 1144.797 | -0.2 | 0.3855 | 0.0000 | 0.0000 | 2.31 |

|          |      |        |        |        |      |
|----------|------|--------|--------|--------|------|
| 1144.797 | 0    | 0.0000 | 1.0000 | 0.0000 | 2.17 |
| 1144.797 | 0.2  | 0.3855 | 0.0000 | 0.0000 | 2.31 |
| 1159.64  | -0.2 | 0.5197 | 0.0000 | 0.0000 | 2.42 |
| 1159.64  | 0    | 0.0000 | 1.0000 | 0.0000 | 2.17 |
| 1159.64  | 0.2  | 0.5107 | 0.0000 | 0.0000 | 2.42 |
| 1170.122 | -0.2 | 0.4526 | 0.0000 | 0.0000 | 2.41 |
| 1170.122 | 0    | 0.0000 | 1.0000 | 0.0000 | 2.17 |
| 1170.122 | 0.2  | 0.4468 | 0.0000 | 0.0000 | 2.45 |
| 1177.698 | -0.2 | 0.2637 | 0.0000 | 0.0000 | 2.29 |
| 1177.698 | 0    | 0.0000 | 1.0000 | 0.0000 | 2.17 |
| 1177.698 | 0.2  | 0.2637 | 0.0000 | 0.0000 | 2.29 |
| 1180.991 | -0.2 | 0.4174 | 0.0000 | 0.0000 | 2.21 |
| 1180.991 | 0    | 0.0000 | 1.0000 | 0.0000 | 2.17 |
| 1180.991 | 0.2  | 0.4181 | 0.0000 | 0.0000 | 2.33 |
| 1193.556 | -0.2 | 0.3193 | 0.0000 | 0.0000 | 2.34 |
| 1193.556 | 0    | 0.0000 | 1.0000 | 0.0000 | 2.17 |
| 1193.556 | 0.2  | 0.3194 | 0.0000 | 0.0000 | 2.35 |
| 1212.029 | -0.2 | 0.5143 | 0.0000 | 0.0000 | 2.39 |
| 1212.029 | 0    | 0.0000 | 1.0000 | 0.0000 | 2.17 |
| 1212.029 | 0.2  | 0.5447 | 0.0000 | 0.0000 | 2.50 |
| 1226.651 | -0.2 | 0.4555 | 0.0000 | 0.0000 | 2.40 |
| 1226.651 | 0    | 0.0000 | 1.0000 | 0.0000 | 2.17 |
| 1226.651 | 0.2  | 0.4555 | 0.0000 | 0.0000 | 2.40 |
| 1239.162 | -0.2 | 0.4274 | 0.0000 | 0.0000 | 2.43 |
| 1239.162 | 0    | 0.0000 | 1.0000 | 0.0000 | 2.17 |
| 1239.162 | 0.2  | 0.4962 | 0.0000 | 0.0000 | 2.48 |
| 1244.12  | -0.2 | 0.4741 | 0.0000 | 0.0000 | 2.41 |
| 1244.12  | 0    | 0.0000 | 1.0000 | 0.0000 | 2.17 |
| 1244.12  | 0.2  | 0.4744 | 0.0000 | 0.0000 | 2.41 |
| 1247.327 | -0.2 | 0.3085 | 0.0000 | 0.0000 | 2.31 |
| 1247.327 | 0    | 0.0000 | 1.0000 | 0.0000 | 2.17 |
| 1247.327 | 0.2  | 0.3085 | 0.0000 | 0.0000 | 2.31 |
| 1262.451 | -0.2 | 0.5224 | 0.0000 | 0.0000 | 2.46 |
| 1262.451 | 0    | 0.0000 | 1.0000 | 0.0000 | 2.17 |
| 1262.451 | 0.2  | 0.5225 | 0.0000 | 0.0000 | 2.46 |
| 1263.439 | -0.2 | 0.4537 | 0.0000 | 0.0000 | 2.54 |

|          |      |        |        |        |      |
|----------|------|--------|--------|--------|------|
| 1263.439 | 0    | 0.0000 | 1.0000 | 0.0000 | 2.17 |
| 1263.439 | 0.2  | 0.4176 | 0.0000 | 0.0000 | 2.18 |
| 1271.182 | -0.2 | 0.4996 | 0.0000 | 0.0000 | 2.32 |
| 1271.182 | 0    | 0.0000 | 1.0000 | 0.0000 | 2.17 |
| 1271.182 | 0.2  | 0.5367 | 0.0000 | 0.0000 | 2.38 |
| 1278.928 | -0.2 | 0.7513 | 0.0000 | 0.0000 | 2.51 |
| 1278.928 | 0    | 0.0000 | 1.0000 | 0.0000 | 2.17 |
| 1278.928 | 0.2  | 0.7513 | 0.0000 | 0.0000 | 2.51 |
| 1302.092 | -0.2 | 0.5100 | 0.0000 | 0.0000 | 2.23 |
| 1302.092 | 0    | 0.0000 | 1.0000 | 0.0000 | 2.17 |
| 1302.092 | 0.2  | 0.5101 | 0.0000 | 0.0000 | 2.23 |
| 1314.37  | -0.2 | 0.6825 | 0.0000 | 0.0000 | 2.44 |
| 1314.37  | 0    | 0.0000 | 1.0000 | 0.0000 | 2.17 |
| 1314.37  | 0.2  | 0.6288 | 0.0000 | 0.0000 | 2.41 |
| 1320.251 | -0.2 | 0.5608 | 0.0000 | 0.0000 | 2.35 |
| 1320.251 | 0    | 0.0000 | 1.0000 | 0.0000 | 2.17 |
| 1320.251 | 0.2  | 0.5610 | 0.0000 | 0.0000 | 2.35 |
| 1333.082 | -0.2 | 0.4519 | 0.0000 | 0.0000 | 2.46 |
| 1333.082 | 0    | 0.0000 | 1.0000 | 0.0000 | 2.17 |
| 1333.082 | 0.2  | 0.4643 | 0.0000 | 0.0000 | 2.09 |
| 1334.966 | -0.2 | 0.6542 | 0.0000 | 0.0000 | 2.46 |
| 1334.966 | 0    | 0.0000 | 1.0000 | 0.0000 | 2.17 |
| 1334.966 | 0.2  | 0.6554 | 0.0000 | 0.0000 | 2.46 |
| 1349.468 | -0.2 | 0.5778 | 0.0000 | 0.0000 | 2.21 |
| 1349.468 | 0    | 0.0000 | 1.0000 | 0.0000 | 2.17 |
| 1349.468 | 0.2  | 0.5777 | 0.0000 | 0.0000 | 2.21 |
| 1353.085 | -0.2 | 1.0016 | 0.0000 | 0.0000 | 2.53 |
| 1353.085 | 0    | 0.0000 | 1.0000 | 0.0000 | 2.17 |
| 1353.085 | 0.2  | 0.9917 | 0.0000 | 0.0000 | 2.26 |
| 1374.956 | -0.2 | 1.4151 | 0.0000 | 0.0000 | 2.42 |
| 1374.956 | 0    | 0.0000 | 1.0000 | 0.0000 | 2.17 |
| 1374.956 | 0.2  | 1.4152 | 0.0000 | 0.0000 | 2.42 |
| 1379.962 | -0.2 | 1.1179 | 0.0000 | 0.0000 | 2.38 |
| 1379.962 | 0    | 0.0000 | 1.0000 | 0.0000 | 2.17 |
| 1379.962 | 0.2  | 0.9876 | 0.0000 | 0.0000 | 2.50 |
| 1387.776 | -0.2 | 1.1499 | 0.0000 | 0.0000 | 2.50 |

|          |      |        |        |        |      |
|----------|------|--------|--------|--------|------|
| 1387.776 | 0    | 0.0000 | 1.0000 | 0.0000 | 2.17 |
| 1387.776 | 0.2  | 1.1501 | 0.0000 | 0.0000 | 2.50 |
| 1392.965 | -0.2 | 0.9783 | 0.0000 | 0.0000 | 2.54 |
| 1392.965 | 0    | 0.0000 | 1.0000 | 0.0000 | 2.17 |
| 1392.965 | 0.2  | 1.0016 | 0.0000 | 0.0000 | 2.05 |
| 1398.092 | -0.2 | 0.6244 | 0.0000 | 0.0000 | 2.40 |
| 1398.092 | 0    | 0.0000 | 1.0000 | 0.0000 | 2.17 |
| 1398.092 | 0.2  | 0.6242 | 0.0000 | 0.0000 | 2.40 |
| 1400.363 | -0.2 | 0.7322 | 0.0000 | 0.0000 | 2.50 |
| 1400.363 | 0    | 0.0000 | 1.0000 | 0.0000 | 2.17 |
| 1400.363 | 0.2  | 0.7389 | 0.0000 | 0.0000 | 2.38 |
| 1413.582 | -0.2 | 0.8917 | 0.0000 | 0.0000 | 2.50 |
| 1413.582 | 0    | 0.0000 | 1.0000 | 0.0000 | 2.17 |
| 1413.582 | 0.2  | 0.8917 | 0.0000 | 0.0000 | 2.50 |
| 1417.365 | -0.2 | 1.0035 | 0.0000 | 0.0000 | 2.48 |
| 1417.365 | 0    | 0.0000 | 1.0000 | 0.0000 | 2.17 |
| 1417.365 | 0.2  | 0.9591 | 0.0000 | 0.0000 | 2.27 |
| 1433.511 | -0.2 | 0.6049 | 0.0000 | 0.0000 | 2.38 |
| 1433.511 | 0    | 0.0000 | 1.0000 | 0.0000 | 2.17 |
| 1433.511 | 0.2  | 0.6200 | 0.0000 | 0.0000 | 2.21 |
| 1441.32  | -0.2 | 0.9623 | 0.0000 | 0.0000 | 2.55 |
| 1441.32  | 0    | 0.0000 | 1.0000 | 0.0000 | 2.17 |
| 1441.32  | 0.2  | 0.9624 | 0.0000 | 0.0000 | 2.55 |
| 1442.096 | -0.2 | 1.0422 | 0.0000 | 0.0000 | 2.27 |
| 1442.096 | 0    | 0.0000 | 1.0000 | 0.0000 | 2.17 |
| 1442.096 | 0.2  | 1.1192 | 0.0000 | 0.0000 | 2.47 |
| 1446.504 | -0.2 | 1.0434 | 0.0000 | 0.0000 | 2.59 |
| 1446.504 | 0    | 0.0000 | 1.0000 | 0.0000 | 2.17 |
| 1446.504 | 0.2  | 1.0436 | 0.0000 | 0.0000 | 2.59 |
| 1465.238 | -0.2 | 0.6114 | 0.0000 | 0.0000 | 2.28 |
| 1465.238 | 0    | 0.0000 | 1.0000 | 0.0000 | 2.17 |
| 1465.238 | 0.2  | 0.6117 | 0.0000 | 0.0000 | 2.28 |
| 1469.413 | -0.2 | 0.5596 | 0.0000 | 0.0000 | 2.34 |
| 1469.413 | 0    | 0.0000 | 1.0000 | 0.0000 | 2.17 |
| 1469.413 | 0.2  | 0.5406 | 0.0000 | 0.0000 | 2.26 |
| 1474.716 | -0.2 | 0.5754 | 0.0000 | 0.0000 | 2.28 |

|          |      |        |        |        |      |
|----------|------|--------|--------|--------|------|
| 1474.716 | 0    | 0.0000 | 1.0000 | 0.0000 | 2.17 |
| 1474.716 | 0.2  | 0.5753 | 0.0000 | 0.0000 | 2.28 |
| 1491.616 | -0.2 | 0.8496 | 0.0000 | 0.0000 | 2.46 |
| 1491.616 | 0    | 0.0000 | 1.0000 | 0.0000 | 2.17 |
| 1491.616 | 0.2  | 0.8497 | 0.0000 | 0.0000 | 2.46 |
| 1500.039 | -0.2 | 1.1287 | 0.0000 | 0.0000 | 2.49 |
| 1500.039 | 0    | 0.0000 | 1.0000 | 0.0000 | 2.17 |
| 1500.039 | 0.2  | 1.2470 | 0.0000 | 0.0000 | 2.71 |
| 1515.998 | -0.2 | 0.5833 | 0.0000 | 0.0000 | 2.22 |
| 1515.998 | 0    | 0.0000 | 1.0000 | 0.0000 | 2.17 |
| 1515.998 | 0.2  | 0.5834 | 0.0000 | 0.0000 | 2.22 |
| 1523.474 | -0.2 | 0.6713 | 0.0000 | 0.0000 | 2.38 |
| 1523.474 | 0    | 0.0000 | 1.0000 | 0.0000 | 2.17 |
| 1523.474 | 0.2  | 0.6713 | 0.0000 | 0.0000 | 2.38 |
| 1526.435 | -0.2 | 0.9327 | 0.0000 | 0.0000 | 2.48 |
| 1526.435 | 0    | 0.0000 | 1.0000 | 0.0000 | 2.17 |
| 1526.435 | 0.2  | 0.8254 | 0.0000 | 0.0000 | 2.32 |
| 1538.013 | -0.2 | 0.9461 | 0.0000 | 0.0000 | 2.52 |
| 1538.013 | 0    | 0.0000 | 1.0000 | 0.0000 | 2.17 |
| 1538.013 | 0.2  | 0.8464 | 0.0000 | 0.0000 | 2.59 |
| 1540.413 | -0.2 | 0.8248 | 0.0000 | 0.0000 | 2.41 |
| 1540.413 | 0    | 0.0000 | 1.0000 | 0.0000 | 2.17 |
| 1540.413 | 0.2  | 0.8243 | 0.0000 | 0.0000 | 2.41 |
| 1555.19  | -0.2 | 1.0828 | 0.0000 | 0.0000 | 2.30 |
| 1555.19  | 0    | 0.0000 | 1.0000 | 0.0000 | 2.17 |
| 1555.19  | 0.2  | 1.0500 | 0.0000 | 0.0000 | 2.52 |
| 1560.927 | -0.2 | 1.0783 | 0.0000 | 0.0000 | 2.38 |
| 1560.927 | 0    | 0.0000 | 1.0000 | 0.0000 | 2.17 |
| 1560.927 | 0.2  | 1.2138 | 0.0000 | 0.0000 | 2.39 |
| 1574.906 | -0.2 | 1.0987 | 0.0000 | 0.0000 | 2.31 |
| 1574.906 | 0    | 0.0000 | 1.0000 | 0.0000 | 2.17 |
| 1574.906 | 0.2  | 1.0982 | 0.0000 | 0.0000 | 2.31 |
| 1588.903 | -0.2 | 1.0531 | 0.0000 | 0.0000 | 2.70 |
| 1588.903 | 0    | 0.0000 | 1.0000 | 0.0000 | 2.17 |
| 1588.903 | 0.2  | 1.2496 | 0.0000 | 0.0000 | 2.30 |
| 1600.603 | -0.2 | 1.3452 | 0.0000 | 0.0000 | 2.44 |

|          |      |        |        |        |      |
|----------|------|--------|--------|--------|------|
| 1600.603 | 0    | 0.0000 | 1.0000 | 0.0000 | 2.17 |
| 1600.603 | 0.2  | 1.3451 | 0.0000 | 0.0000 | 2.45 |
| 1620.955 | -0.2 | 1.5007 | 0.0000 | 0.0000 | 2.45 |
| 1620.955 | 0    | 0.0000 | 1.0000 | 0.0000 | 2.17 |
| 1620.955 | 0.2  | 1.6148 | 0.0000 | 0.0000 | 2.66 |
| 1622.342 | -0.2 | 1.0684 | 0.0000 | 0.0000 | 2.33 |
| 1622.342 | 0    | 0.0000 | 1.0000 | 0.0000 | 2.17 |
| 1622.342 | 0.2  | 1.0681 | 0.0000 | 0.0000 | 2.33 |
| 1637.633 | -0.2 | 1.2627 | 0.0000 | 0.0000 | 2.18 |
| 1637.633 | 0    | 0.0000 | 1.0000 | 0.0000 | 2.17 |
| 1637.633 | 0.2  | 1.2633 | 0.0000 | 0.0000 | 2.18 |
| 1642.559 | -0.2 | 1.2775 | 0.0000 | 0.0000 | 2.70 |
| 1642.559 | 0    | 0.0000 | 1.0000 | 0.0000 | 2.17 |
| 1642.559 | 0.2  | 1.1385 | 0.0000 | 0.0000 | 1.98 |
| 1645.085 | -0.2 | 1.1578 | 0.0000 | 0.0000 | 2.33 |
| 1645.085 | 0    | 0.0000 | 1.0000 | 0.0000 | 2.17 |
| 1645.085 | 0.2  | 1.1578 | 0.0000 | 0.0000 | 2.33 |
| 1646.611 | -0.2 | 1.1627 | 0.0000 | 0.0000 | 2.44 |
| 1646.611 | 0    | 0.0000 | 1.0000 | 0.0000 | 2.17 |
| 1646.611 | 0.2  | 1.3743 | 0.0000 | 0.0000 | 2.76 |
| 1659.531 | -0.2 | 1.3431 | 0.0000 | 0.0000 | 2.66 |
| 1659.531 | 0    | 0.0000 | 1.0000 | 0.0000 | 2.17 |
| 1659.531 | 0.2  | 1.3813 | 0.0000 | 0.0000 | 1.72 |
| 3189.305 | -0.2 | 1.1950 | 0.0000 | 0.0000 | 2.14 |
| 3189.305 | 0    | 0.0000 | 1.0000 | 0.0000 | 2.17 |
| 3189.305 | 0.2  | 0.5440 | 0.0000 | 0.0000 | 2.13 |
| 3192.045 | -0.2 | 0.3384 | 0.0000 | 0.0000 | 1.66 |
| 3192.045 | 0    | 0.0000 | 1.0000 | 0.0000 | 2.17 |
| 3192.045 | 0.2  | 0.3383 | 0.0000 | 0.0000 | 1.65 |
| 3192.295 | -0.2 | 0.3834 | 0.0000 | 0.0000 | 1.58 |
| 3192.295 | 0    | 0.0000 | 1.0000 | 0.0000 | 2.17 |
| 3192.295 | 0.2  | 0.3771 | 0.0000 | 0.0000 | 1.84 |
| 3192.988 | -0.2 | 0.4901 | 0.0000 | 0.0000 | 1.90 |
| 3192.988 | 0    | 0.0000 | 1.0000 | 0.0000 | 2.17 |
| 3192.988 | 0.2  | 0.7453 | 0.0000 | 0.0000 | 1.99 |
| 3194.203 | -0.2 | 0.3465 | 0.0000 | 0.0000 | 1.66 |



|          |      |        |        |        |      |
|----------|------|--------|--------|--------|------|
| 3194.203 | 0    | 0.0000 | 1.0000 | 0.0000 | 2.17 |
| 3194.203 | 0.2  | 0.3463 | 0.0000 | 0.0000 | 1.67 |
| 3195.133 | -0.2 | 0.4437 | 0.0000 | 0.0000 | 1.94 |
| 3195.133 | 0    | 0.0000 | 1.0000 | 0.0000 | 2.17 |
| 3195.133 | 0.2  | 0.5849 | 0.0000 | 0.0000 | 1.73 |
| 3222.281 | -0.2 | 0.5412 | 0.0000 | 0.0000 | 1.86 |
| 3222.281 | 0    | 0.0000 | 1.0000 | 0.0000 | 2.17 |
| 3222.281 | 0.2  | 0.5413 | 0.0000 | 0.0000 | 1.86 |
| 3224.917 | -0.2 | 0.5144 | 0.0000 | 0.0000 | 1.86 |
| 3224.917 | 0    | 0.0000 | 1.0000 | 0.0000 | 2.17 |
| 3224.917 | 0.2  | 0.6398 | 0.0000 | 0.0000 | 1.94 |
| 3227.993 | -0.2 | 0.3467 | 0.0000 | 0.0000 | 1.66 |
| 3227.993 | 0    | 0.0000 | 1.0000 | 0.0000 | 2.17 |
| 3227.993 | 0.2  | 0.3468 | 0.0000 | 0.0000 | 1.66 |
| 3228.589 | -0.2 | 0.3877 | 0.0000 | 0.0000 | 1.71 |
| 3228.589 | 0    | 0.0000 | 1.0000 | 0.0000 | 2.17 |
| 3228.589 | 0.2  | 0.4031 | 0.0000 | 0.0000 | 1.72 |
| 3237.745 | -0.2 | 0.6230 | 0.0000 | 0.0000 | 1.93 |
| 3237.745 | 0    | 0.0000 | 1.0000 | 0.0000 | 2.17 |
| 3237.745 | 0.2  | 0.6212 | 0.0000 | 0.0000 | 1.93 |
| 3239.842 | -0.2 | 0.7898 | 0.0000 | 0.0000 | 2.02 |
| 3239.842 | 0    | 0.0000 | 1.0000 | 0.0000 | 2.17 |
| 3239.842 | 0.2  | 0.5512 | 0.0000 | 0.0000 | 1.92 |
| 3245.335 | -0.2 | 0.5656 | 0.0000 | 0.0000 | 1.87 |
| 3245.335 | 0    | 0.0000 | 1.0000 | 0.0000 | 2.17 |
| 3245.335 | 0.2  | 0.5656 | 0.0000 | 0.0000 | 1.87 |
| 3246.713 | -0.2 | 0.4630 | 0.0000 | 0.0000 | 1.90 |
| 3246.713 | 0    | 0.0000 | 1.0000 | 0.0000 | 2.17 |
| 3246.713 | 0.2  | 0.5773 | 0.0000 | 0.0000 | 1.76 |
| 3248.156 | -0.2 | 0.3564 | 0.0000 | 0.0000 | 1.66 |
| 3248.156 | 0    | 0.0000 | 1.0000 | 0.0000 | 2.17 |
| 3248.156 | 0.2  | 0.3564 | 0.0000 | 0.0000 | 1.66 |
| 3248.64  | -0.2 | 0.3751 | 0.0000 | 0.0000 | 1.83 |
| 3248.64  | 0    | 0.0000 | 1.0000 | 0.0000 | 2.17 |
| 3248.64  | 0.2  | 0.3750 | 0.0000 | 0.0000 | 1.54 |
| 3263.676 | -0.2 | 0.5273 | 0.0000 | 0.0000 | 1.82 |

|          |      |        |        |        |      |
|----------|------|--------|--------|--------|------|
| 3263.676 | 0    | 0.0000 | 1.0000 | 0.0000 | 2.17 |
| 3263.676 | 0.2  | 0.5259 | 0.0000 | 0.0000 | 1.82 |
| 3265.796 | -0.2 | 0.4528 | 0.0000 | 0.0000 | 1.95 |
| 3265.796 | 0    | 0.0000 | 1.0000 | 0.0000 | 2.17 |
| 3265.796 | 0.2  | 0.5605 | 0.0000 | 0.0000 | 1.64 |

**Table S7.** Photo-physical parameters ( $\Delta E_{Q_p}$ ,  $P_{Q_p}(\text{RT})$ ,  $E_{T_1-S_0}$ , and  $\langle T_1 | \hat{H}_{SO} | S_0 \rangle_{Q_p}^2$ )

calculated for geometries allowed by normal-mode vibrations with frequency in  $T_1$  at RT for chromophore **S4**.  $\omega_p$  is the wavenumber of the  $p$ th normal vibrational mode in the structure optimized at  $T_1$ .  $Q_p$  is the mass weighted normal coordinates at  $T_1$ . Calculation regarding geometries was stopped when  $\Delta E_{Q_p}$  becomes larger than 0.2 eV because these geometries with  $\Delta E_{Q_p} > 0.2$  eV are hardly allowed below RT.  $E_{T_1-S_0}$  does not largely change for  $Q_p$  with  $P_{Q_p}(\text{RT}) > 0.01$  which corresponds to geometries much allowed at RT.

| $\omega_p$<br>( $\text{cm}^{-1}$ ) | $Q_p$<br>(a.u.) | $\Delta E_{Q_p}$<br>(eV) | $P_{Q_p}(\text{RT})$ | $\langle T_1   \hat{H}_{SO}   S_0 \rangle_{Q_p}^2$<br>( $\text{cm}^{-2}$ ) | $E_{T_1-S_0}$<br>(eV) |
|------------------------------------|-----------------|--------------------------|----------------------|----------------------------------------------------------------------------|-----------------------|
| 168.35                             | -0.2            | 0.2104                   | 0.0003               | 0.0000                                                                     | 2.50                  |
| 168.35                             | 0               | 0.0000                   | 1.0000               | 0.0000                                                                     | 2.29                  |
| 168.35                             | 0.2             | 0.2104                   | 0.0003               | 0.0000                                                                     | 2.50                  |
| 169.4125                           | -0.2            | 0.3043                   | 0.0000               | 0.0002                                                                     | 2.58                  |
| 169.4125                           | 0               | 0.0000                   | 1.0000               | 0.0000                                                                     | 2.29                  |
| 169.4125                           | 0.2             | 0.3043                   | 0.0000               | 0.0002                                                                     | 2.58                  |
| 289.5391                           | -0.2            | 0.3899                   | 0.0000               | 0.0000                                                                     | 2.64                  |
| 289.5391                           | 0               | 0.0000                   | 1.0000               | 0.0000                                                                     | 2.29                  |
| 289.5391                           | 0.2             | 0.4160                   | 0.0000               | 0.0000                                                                     | 2.67                  |
| 359.661                            | -0.4            | 0.7721                   | 0.0000               | 0.0048                                                                     | 2.90                  |
| 359.661                            | -0.2            | 0.1914                   | 0.0006               | 0.0013                                                                     | 2.45                  |
| 359.661                            | 0               | 0.0000                   | 1.0000               | 0.0000                                                                     | 2.29                  |
| 359.661                            | 0.2             | 0.1914                   | 0.0006               | 0.0013                                                                     | 2.45                  |
| 359.661                            | 0.4             | 0.7721                   | 0.0000               | 0.0048                                                                     | 2.90                  |
| 397.8611                           | -0.2            | 0.2706                   | 0.0000               | 0.0001                                                                     | 2.52                  |
| 397.8611                           | 0               | 0.0000                   | 1.0000               | 0.0000                                                                     | 2.29                  |
| 397.8611                           | 0.2             | 0.2706                   | 0.0000               | 0.0001                                                                     | 2.52                  |

|          |      |        |        |        |      |
|----------|------|--------|--------|--------|------|
| 478.8733 | -0.2 | 0.3493 | 0.0000 | 0.0000 | 2.58 |
| 478.8733 | 0    | 0.0000 | 1.0000 | 0.0000 | 2.29 |
| 478.8733 | 0.2  | 0.3493 | 0.0000 | 0.0000 | 2.58 |
| 483.3368 | -0.2 | 0.4919 | 0.0000 | 0.0000 | 2.64 |
| 483.3368 | 0    | 0.0000 | 1.0000 | 0.0000 | 2.29 |
| 483.3368 | 0.2  | 0.4068 | 0.0000 | 0.0000 | 2.55 |
| 507.1765 | -0.4 | 0.2548 | 0.0000 | 0.0000 | 2.33 |
| 507.1765 | -0.2 | 0.0635 | 0.0845 | 0.0000 | 2.39 |
| 507.1765 | 0    | 0.0000 | 1.0000 | 0.0000 | 2.29 |
| 507.1765 | 0.2  | 0.0635 | 0.0845 | 0.0000 | 2.07 |
| 507.1765 | 0.4  | 0.2548 | 0.0000 | 0.0000 | 1.72 |
| 520.4343 | -0.2 | 0.2320 | 0.0001 | 0.0000 | 2.45 |
| 520.4343 | 0    | 0.0000 | 1.0000 | 0.0000 | 2.29 |
| 520.4343 | 0.2  | 0.2320 | 0.0001 | 0.0000 | 2.45 |
| 598.3671 | -0.4 | 0.6662 | 0.0000 | 0.1211 | 2.12 |
| 598.3671 | -0.2 | 0.1674 | 0.0015 | 0.0308 | 2.25 |
| 598.3671 | 0    | 0.0000 | 1.0000 | 0.0000 | 2.29 |
| 598.3671 | 0.2  | 0.1674 | 0.0015 | 0.0308 | 2.25 |
| 598.3671 | 0.4  | 0.6662 | 0.0000 | 0.1211 | 2.12 |
| 701.9404 | -0.2 | 0.4510 | 0.0000 | 0.0000 | 2.70 |
| 701.9404 | 0    | 0.0000 | 1.0000 | 0.0000 | 2.29 |
| 701.9404 | 0.2  | 0.3758 | 0.0000 | 0.0000 | 2.63 |
| 702.3578 | -0.2 | 0.5507 | 0.0000 | 0.0000 | 2.79 |
| 702.3578 | 0    | 0.0000 | 1.0000 | 0.0000 | 2.29 |
| 702.3578 | 0.2  | 0.5507 | 0.0000 | 0.0000 | 2.79 |
| 724.8859 | -0.2 | 0.2190 | 0.0002 | 0.0000 | 2.42 |
| 724.8859 | 0    | 0.0000 | 1.0000 | 0.0000 | 2.29 |
| 724.8859 | 0.2  | 0.2190 | 0.0002 | 0.0000 | 2.42 |
| 739.4618 | -0.2 | 0.2383 | 0.0001 | 0.0000 | 2.45 |
| 739.4618 | 0    | 0.0000 | 1.0000 | 0.0000 | 2.29 |
| 739.4618 | 0.2  | 0.2383 | 0.0001 | 0.0000 | 2.45 |
| 756.7988 | -0.4 | 0.4743 | 0.0000 | 0.0000 | 1.91 |
| 756.7988 | -0.2 | 0.1182 | 0.0101 | 0.0000 | 2.25 |
| 756.7988 | 0    | 0.0000 | 1.0000 | 0.0000 | 2.29 |
| 756.7988 | 0.2  | 0.1182 | 0.0101 | 0.0000 | 2.16 |
| 756.7988 | 0.4  | 0.4743 | 0.0000 | 0.0000 | 1.90 |

|          |      |        |        |        |      |
|----------|------|--------|--------|--------|------|
| 800.8335 | -0.2 | 0.4178 | 0.0000 | 0.0000 | 2.63 |
| 800.8335 | 0    | 0.0000 | 1.0000 | 0.0000 | 2.29 |
| 800.8335 | 0.2  | 0.4861 | 0.0000 | 0.0000 | 2.70 |
| 806.1955 | -0.2 | 0.6219 | 0.0000 | 0.0016 | 2.70 |
| 806.1955 | 0    | 0.0000 | 1.0000 | 0.0000 | 2.29 |
| 806.1955 | 0.2  | 0.6219 | 0.0000 | 0.0016 | 2.70 |
| 821.5424 | -0.2 | 0.4429 | 0.0000 | 0.0001 | 2.63 |
| 821.5424 | 0    | 0.0000 | 1.0000 | 0.0000 | 2.29 |
| 821.5424 | 0.2  | 0.4429 | 0.0000 | 0.0001 | 2.63 |
| 824.9834 | -0.2 | 0.3289 | 0.0000 | 0.0000 | 2.49 |
| 824.9834 | 0    | 0.0000 | 1.0000 | 0.0000 | 2.29 |
| 824.9834 | 0.2  | 0.3289 | 0.0000 | 0.0000 | 2.49 |
| 857.9654 | -0.4 | 0.7612 | 0.0000 | 0.0236 | 0.56 |
| 857.9654 | -0.2 | 0.1913 | 0.0006 | 0.0058 | 1.88 |
| 857.9654 | 0    | 0.0000 | 1.0000 | 0.0000 | 2.29 |
| 857.9654 | 0.2  | 0.1913 | 0.0006 | 0.0058 | 1.88 |
| 857.9654 | 0.4  | 0.7612 | 0.0000 | 0.0236 | 0.56 |
| 918.0738 | -0.2 | 0.4894 | 0.0000 | 0.0000 | 2.44 |
| 918.0738 | 0    | 0.0000 | 1.0000 | 0.0000 | 2.29 |
| 918.0738 | 0.2  | 0.4538 | 0.0000 | 0.0000 | 2.41 |
| 942.3764 | -0.2 | 0.7283 | 0.0000 | 0.0000 | 2.94 |
| 942.3764 | 0    | 0.0000 | 1.0000 | 0.0000 | 2.29 |
| 942.3764 | 0.2  | 0.7283 | 0.0000 | 0.0000 | 2.94 |
| 943.5364 | -0.2 | 0.7168 | 0.0000 | 0.0000 | 2.92 |
| 943.5364 | 0    | 0.0000 | 1.0000 | 0.0000 | 2.29 |
| 943.5364 | 0.2  | 0.7168 | 0.0000 | 0.0000 | 2.92 |
| 952.5406 | -0.2 | 0.2419 | 0.0001 | 0.0000 | 2.28 |
| 952.5406 | 0    | 0.0000 | 1.0000 | 0.0000 | 2.29 |
| 952.5406 | 0.2  | 0.2452 | 0.0001 | 0.0000 | 2.29 |
| 1060.205 | -0.4 | 0.7919 | 0.0000 | 0.0012 | 2.30 |
| 1060.205 | -0.2 | 0.1959 | 0.0005 | 0.0003 | 2.30 |
| 1060.205 | 0    | 0.0000 | 1.0000 | 0.0000 | 2.29 |
| 1060.205 | 0.2  | 0.1959 | 0.0005 | 0.0003 | 2.30 |
| 1060.205 | 0.4  | 0.7919 | 0.0000 | 0.0012 | 2.30 |
| 1064.15  | -0.2 | 0.4518 | 0.0000 | 0.0000 | 2.42 |
| 1064.15  | 0    | 0.0000 | 1.0000 | 0.0000 | 2.29 |

|          |      |        |        |        |      |
|----------|------|--------|--------|--------|------|
| 1064.15  | 0.2  | 0.4518 | 0.0000 | 0.0000 | 2.75 |
| 1136.71  | -0.2 | 0.3521 | 0.0000 | 0.0044 | 2.48 |
| 1136.71  | 0    | 0.0000 | 1.0000 | 0.0000 | 2.29 |
| 1136.71  | 0.2  | 0.3521 | 0.0000 | 0.0044 | 2.48 |
| 1192.132 | -0.4 | 0.6522 | 0.0000 | 0.0000 | 2.35 |
| 1192.132 | -0.2 | 0.1635 | 0.0017 | 0.0000 | 2.28 |
| 1192.132 | 0    | 0.0000 | 1.0000 | 0.0000 | 2.29 |
| 1192.132 | 0.2  | 0.1635 | 0.0017 | 0.0000 | 2.41 |
| 1192.132 | 0.4  | 0.6522 | 0.0000 | 0.0000 | 2.61 |
| 1209.731 | -0.2 | 0.3457 | 0.0000 | 0.0085 | 2.53 |
| 1209.731 | 0    | 0.0000 | 1.0000 | 0.0000 | 2.29 |
| 1209.731 | 0.2  | 0.3457 | 0.0000 | 0.0085 | 2.53 |
| 1216.186 | -0.2 | 0.6734 | 0.0000 | 0.0000 | 2.62 |
| 1216.186 | 0    | 0.0000 | 1.0000 | 0.0000 | 2.29 |
| 1216.186 | 0.2  | 0.7209 | 0.0000 | 0.0000 | 2.67 |
| 1295.12  | -0.2 | 0.5402 | 0.0000 | 0.0000 | 2.57 |
| 1295.12  | 0    | 0.0000 | 1.0000 | 0.0000 | 2.29 |
| 1295.12  | 0.2  | 0.5402 | 0.0000 | 0.0000 | 2.57 |
| 1373.518 | -0.2 | 0.6555 | 0.0000 | 0.0000 | 2.70 |
| 1373.518 | 0    | 0.0000 | 1.0000 | 0.0000 | 2.29 |
| 1373.518 | 0.2  | 0.9365 | 0.0000 | 0.0000 | 2.98 |
| 1409.915 | -0.2 | 1.0123 | 0.0000 | 0.0000 | 1.46 |
| 1409.915 | 0    | 0.0000 | 1.0000 | 0.0000 | 2.29 |
| 1409.915 | 0.2  | 1.0123 | 0.0000 | 0.0000 | 3.13 |
| 1425.944 | -0.2 | 0.3167 | 0.0000 | 0.0029 | 2.37 |
| 1425.944 | 0    | 0.0000 | 1.0000 | 0.0000 | 2.29 |
| 1425.944 | 0.2  | 0.3167 | 0.0000 | 0.0029 | 2.37 |
| 1443.001 | -0.2 | 0.3356 | 0.0000 | 0.0000 | 2.35 |
| 1443.001 | 0    | 0.0000 | 1.0000 | 0.0000 | 2.29 |
| 1443.001 | 0.2  | 0.3384 | 0.0000 | 0.0000 | 2.36 |
| 1470.613 | -0.2 | 0.9195 | 0.0000 | 0.0010 | 2.79 |
| 1470.613 | 0    | 0.0000 | 1.0000 | 0.0000 | 2.29 |
| 1470.613 | 0.2  | 0.9195 | 0.0000 | 0.0010 | 2.79 |
| 1492.87  | -0.2 | 0.8849 | 0.0000 | 0.0000 | 2.92 |
| 1492.87  | 0    | 0.0000 | 1.0000 | 0.0000 | 2.29 |
| 1492.87  | 0.2  | 0.8849 | 0.0000 | 0.0000 | 2.74 |

|          |      |        |        |        |      |
|----------|------|--------|--------|--------|------|
| 1494.425 | -0.2 | 1.2525 | 0.0000 | 0.0007 | 3.07 |
| 1494.425 | 0    | 0.0000 | 1.0000 | 0.0000 | 2.29 |
| 1494.425 | 0.2  | 1.2525 | 0.0000 | 0.0007 | 3.07 |
| 1554.02  | -0.2 | 0.3713 | 0.0000 | 0.0424 | 1.94 |
| 1554.02  | 0    | 0.0000 | 1.0000 | 0.0000 | 2.29 |
| 1554.02  | 0.2  | 0.3713 | 0.0000 | 0.0424 | 1.94 |
| 1663.608 | -0.2 | 0.3702 | 0.0000 | 0.0000 | 2.38 |
| 1663.608 | 0    | 0.0000 | 1.0000 | 0.0000 | 2.29 |
| 1663.608 | 0.2  | 0.3702 | 0.0000 | 0.0000 | 2.38 |
| 3183.618 | -0.2 | 0.1453 | 0.0035 | 0.0000 | 1.62 |
| 3183.618 | 0    | 0.0000 | 1.0000 | 0.0000 | 2.29 |
| 3183.618 | 0.2  | 0.1413 | 0.0041 | 0.0000 | 1.61 |
| 3186.633 | -0.2 | 0.0605 | 0.0950 | 0.0022 | 1.52 |
| 3186.633 | 0    | 0.0000 | 1.0000 | 0.0000 | 2.29 |
| 3186.633 | 0.2  | 0.0605 | 0.0950 | 0.0022 | 1.52 |
| 3186.914 | -0.2 | 0.1676 | 0.0015 | 0.0871 | 1.64 |
| 3186.914 | 0    | 0.0000 | 1.0000 | 0.0000 | 2.29 |
| 3186.914 | 0.2  | 0.1676 | 0.0015 | 0.0871 | 1.64 |
| 3193.241 | -0.2 | 0.0863 | 0.0348 | 0.0000 | 1.69 |
| 3193.241 | 0    | 0.0000 | 1.0000 | 0.0000 | 2.29 |
| 3193.241 | 0.2  | 0.0863 | 0.0348 | 0.0000 | 1.40 |
| 3197.959 | -0.2 | 0.1466 | 0.0033 | 0.0000 | 1.61 |
| 3197.959 | 0    | 0.0000 | 1.0000 | 0.0000 | 2.29 |
| 3197.959 | 0.2  | 0.1521 | 0.0027 | 0.0000 | 1.62 |
| 3200.079 | -0.2 | 0.1216 | 0.0088 | 0.1617 | 1.58 |
| 3200.079 | 0    | 0.0000 | 1.0000 | 0.0000 | 2.29 |
| 3200.079 | 0.2  | 0.1216 | 0.0088 | 0.1617 | 1.58 |
| 3213.049 | -0.2 | 0.2338 | 0.0001 | 0.0079 | 1.67 |
| 3213.049 | 0    | 0.0000 | 1.0000 | 0.0000 | 2.29 |
| 3213.049 | 0.2  | 0.2338 | 0.0001 | 0.0079 | 1.67 |
| 3215.206 | -0.2 | 0.2164 | 0.0002 | 0.0000 | 1.49 |
| 3215.206 | 0    | 0.0000 | 1.0000 | 0.0000 | 2.29 |
| 3215.206 | 0.2  | 0.2164 | 0.0002 | 0.0000 | 1.83 |

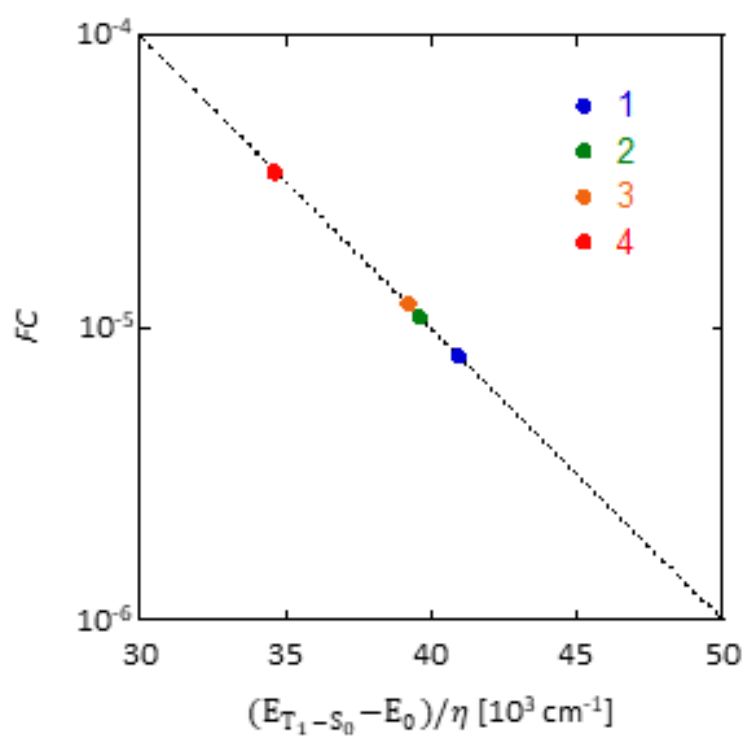

**Figure S25.** Relationship between  $FC$  and  $(E_{T_1-S_0} - E_0)/\eta$  to convert from  $E_{T_1-S_0}$  and  $\eta$  to  $FC$  for protonated chromophores.

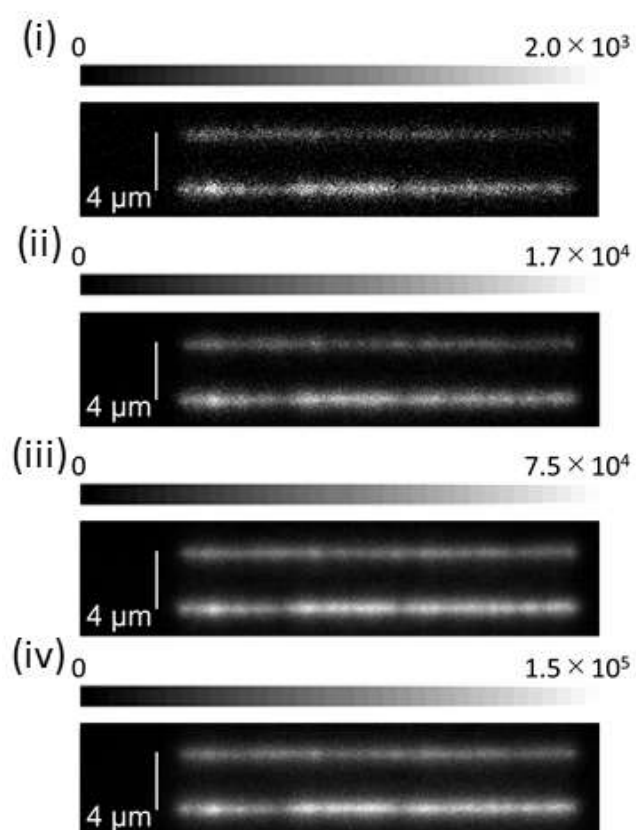

**Figure S26.** Steady state emission images of sample 3D under 445 nm-excitation with difference in irradiance. Excitation power at 445 nm: (i)  $2.6 \times 10^{-1}$  mW/cm<sup>2</sup>, (ii)  $3.5 \times 10^0$  mW/cm<sup>2</sup>, (iii)  $4.4 \times 10^1$  mW/cm<sup>2</sup> and (iv)  $1.6 \times 10^2$  mW/cm<sup>2</sup>.



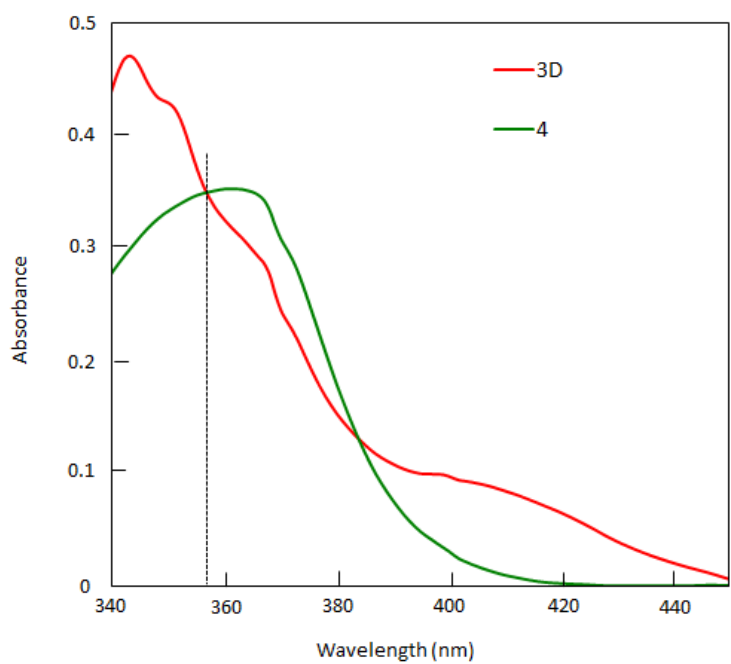

**Figure S27.** Absorption spectra of sample 3D and sample 4 used for demonstration in Figure 6f.

### **Supporting Movies (S1–S3)**

In Movies S1–S3, a camera (1200D, Canon, India) was used to record the videos. All movie backgrounds and camera conditions remained unchanged. The following provides detailed information.

**Movies S1.** Video of *p*RTP emission from **2** under room light. Excitation power density at 360 nm was 3.94 mW cm<sup>-2</sup>. Power density of the room light was 0.05 mW cm<sup>-2</sup> calculated by photons of 532 nm. Faint-yellow *p*RTP emission detected immediately after ceasing the excitation source and almost vanished after 3 s.

**Movies S2.** Video of *p*RTP emission from **4** under room light. Excitation power density at 360 nm was 3.94 mW cm<sup>-2</sup>. Power density of the room light was 0.05 mW cm<sup>-2</sup> calculated by photons of 532 nm. Faint-yellow *p*RTP emission detected immediately after ceasing the excitation source and almost vanished after 3 s.

**Movies S3.** Video of *p*RTP emission from **3D** under room light. Excitation power density at 360 nm was 3.94 mW cm<sup>-2</sup>. Power density of the room light was 0.05 mW cm<sup>-2</sup> calculated by photons of 532 nm. Bright-yellow *p*RTP emission detected immediately after ceasing the excitation source and it remained after 3 s.

## S7. Supporting Reference

(S1) Manzhos, S.; Segawa, H.; Yamashita, K. A Model for Recombination in Type II Dye–Sensitized Solar Cells: Catechol–Thiophene Dyes. *Chem. Phys. Lett.* **2011**, *504*, 230–235.

(S2) Shizu, K.; Noda, H.; Tanaka, H.; Taneda, M.; Uejima, M.; Sato, T.; Tanaka, K.; Kaji, H.; Adachi, C. Highly Efficient Blue Electroluminescence Using Delayed–Fluorescence Emitters with Large Overlap Density between Luminescent and Ground States. *J. Phys. Chem. C* **2015**, *119*, 26283–26289.

(S3) Schmidt, K.; Brovelli, S.; Coropceanu, V.; Baljonne, D.; Cornil, J.; Bazzini, C.; Caronna, T.; Tubino, R.; Meinardi, F.; Shuai, Z. *et al.* Intersystem Crossing Processes in Nonplanar Aromatic Heterocyclic Molecules, *J. Phys. Chem. A* **2007**, *111*, 10490–10499.

(S4) Burin, A. L.; Ratner, M. A. Spin Effects on the Luminescence Yield of Organic Light Emitting Diodes, *J. Chem. Phys.* **1998**, *109*, 6092.

(S5) El-Sayed, M. A. Spin–Orbit Coupling and the Radiationless Processes in Nitrogen Heterocyclics. *J. Chem. Phys.* **1963**, *38*, 2834–2838.

(S6). Gropper, H.; Dörr, F. Die Orientierung der optischen Übergangsmomente in Phenanthren und seinen Azaderivaten. *Ber. Bunsen-Ges. Phys. Chem.* **1963**, *67*, 46–54.

(S7). Lower, S. K.; El-Sayed, M. A. The Triplet State and Molecular Electronic Processes in Organic Molecules. *Chem. Revs.* **1966**, *66*, 199–241.

(S8). Mori, K.; Goumans, T. P. M.; Van Lenthe, E.; Wang, F. Predicting Phosphorescent Lifetimes and Zero-Field Splitting of Organometallic Complexes with Time-Dependent

Density Functional Theory Including Spin–Orbit Coupling. *Phys. Chem. Chem. Phys.*

**2014**, *16*, 14523–14530.

(S9) Hirata, S.; Bhattacharjee, I. Vibrational Radiationless Transition from Triplet States of Chromophores at Room Temperature. *J. Phys. Chem. A* **2021**, *125*, 885–894.

(S10) Hirata, S.; Vacha, M. White Afterglow Room - Temperature Emission from an Isolated Single Aromatic Unit under Ambient Condition. *Adv. Opt. Mater.* **2017**, *5*, 1600096.
